# Supplementary material
Source: Royal Society of Chemistry journal article supplement (doi:10.1039/d6gc01362g)
Supplement: d6gc01362g1.pdf [file d6gc01362g1.pdf]

## **Supplemental Information**

### **Enabling carbon loop with economical C1-based medium-chain fatty acids biomanufacturing**

***Zhang et al.***

## **Table of Contents**

|                                |    |
|--------------------------------|----|
| Supplementary Notes .....      | 3  |
| Supplementary Figures .....    | 14 |
| Supplementary Tables .....     | 22 |
| Supplementary References ..... | 71 |

## Supplementary Notes

### Supplementary Note 1. MCFAs production scale

In this analysis, the CO<sub>2</sub> inflow rate was used as the basis for determining the overall system scale, as it represents the primary carbon input governing the mass and energy balance of downstream processes. Given that other raw materials (e.g., methanol, glucose, and methane) can be readily supplied in proportion to CO<sub>2</sub> consumption, the CO<sub>2</sub> feed rate provides a robust and scalable reference for comparative analysis across different process configurations. This approach ensures consistency between feedstock supply and reactor throughput, facilitating reliable evaluation of process performance, techno-economic feasibility, and environmental sustainability.

The CO<sub>2</sub> inflow rate for this study was set at 13,000 kg·h<sup>-1</sup>, reflecting a representative intermediate scale among existing pilot and demonstration facilities (**Supplementary Table 40**). Reported CO<sub>2</sub> conversion capacities in current industrial and techno-economic studies range widely, from less than 20 kg·h<sup>-1</sup> in small pilot systems (e.g., Mitsubishi Heavy Industries, Japan) to approximately 40,000 kg·h<sup>-1</sup> in large-scale techno-economic and life cycle assessments. The selected value of 13,000 kg·h<sup>-1</sup> therefore corresponds to a practical semi-commercial operation scale, aligning with the emerging industrial deployment of CO<sub>2</sub>-to-methanol technologies. This CO<sub>2</sub> inlet flow rate corresponds to an MCFAs production of approximately 3,000 tons per year. For consistency, to maintain this annual production target across other research pathways, the carbon source inlet flow rates were set as follows: methanol (8,700 kg·h<sup>-1</sup>), glucose (4,000 kg·h<sup>-1</sup>), corncob residues (5,300 kg·h<sup>-1</sup>), and methane (6,200 kg·h<sup>-1</sup>) (**Supplementary Table 2**).

## Supplementary Note 2. Detailed upstream process design

This section outlines the detailed upstream process design used in this study, highlighting the configuration for producing medium-chain fatty acids (MCFAs) from various carbon sources via microbial fermentation. The upstream feedstock supply includes methanol derived from coal-to-methanol, glucose from sugar-based feedstocks, glucose from enzymatic hydrolysis of corncob residues, methanol synthesized from the electrochemical reduction of CO<sub>2</sub> (“liquid sunshine”), and methane biologically assimilated as a one-carbon substrate (**Supplementary Figs. 1–5**). “Liquid sunshine” technology integrates CO<sub>2</sub> capture and catalytic hydrogenation to produce liquid methanol using renewable energy<sup>1</sup>. This technology not only realizes the carbon-neutral utilization of CO<sub>2</sub> but also achieves the storage of renewable energy in the form of liquid chemical fuels.

For the fossil-derived methanol scenario (**Supplementary Fig. 1**), methanol serves as the sole carbon source for the growth of recombinant *Komagataella phaffii* (*Pichia pastoris*), with oxygen (O<sub>2</sub>) supplied via pressure swing adsorption (PSA), while the O<sub>2</sub> separation rate is 95%<sup>2</sup>. The proposed fermentation process achieves a carbon utilization rate of 86%<sup>3</sup>, and based on data from long-chain fatty acid production using methanol and glucose, the expected titer is 2.66 g·L<sup>-1</sup>, with a productivity of 0.13 g·(L·h)<sup>-1</sup> (**Supplementary Table 41**)<sup>4,5</sup>. The process occurs in 300 m<sup>3</sup> fermenters, each with a working capacity of 240 m<sup>3</sup>, leading to a total fermentation volume of 2,588 m<sup>3</sup>, as outlined in **Supplementary Table 2**<sup>6</sup>. The stoichiometric equation for this bioreactor, used in Aspen Plus simulations, is given by **Equation 1**:

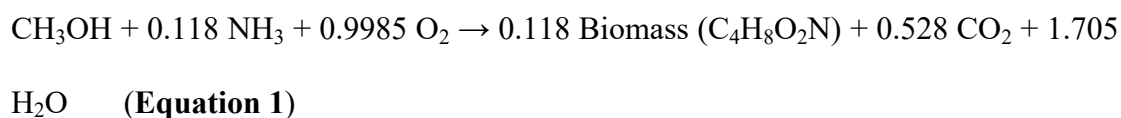

In the food-based scenario (**Supplementary Fig. 2**), glucose is used as the carbon source for recombinant *Escherichia coli* growth, with a carbon conversion efficiency of 90%<sup>7</sup>. The estimated titer for MCFAs is 3.8 g·L<sup>-1</sup> and a productivity of 0.16 g·(L·h)<sup>-1</sup><sup>8</sup>, resulting in an MCFAs content of 21.05%<sup>9</sup>. The fermentation process is carried out in 300 m<sup>3</sup> fermenters, yielding a total fermentation volume of 1,808 m<sup>3</sup> (**Supplementary Table 2**). The stoichiometric equations for bioreactors in the Aspen Plus simulations are derived from **Equation 2**.

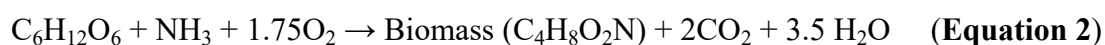

In the case of corncob-derived glucose (**Supplementary Fig. 3**), enzymatic hydrolysis is employed to convert corncob residues into glucose, with an estimated glucose conversion rate of 90%<sup>7</sup>. The fermentation of *Pseudomonas putida* yields an MCFAs titer of 0.45 g·L<sup>-1</sup>, with a productivity of 0.01 g·(L·h)<sup>-1</sup> and an MCFAs content of 17.5%<sup>10</sup>. The total fermentation volume for this process is 2,173 m<sup>3</sup> (**Supplementary Table 2**). The stoichiometric equations for this scenario are similar to those for glucose fermentation, as given in **Equation 2**.

As shown in **Supplementary Fig. 4**, the production of methanol from CO<sub>2</sub> and hydrogen (H<sub>2</sub>) attains a CO<sub>2</sub> single-pass conversion surpassing 95% at a pressure of 5.0 MPa, an H<sub>2</sub>: CO<sub>2</sub> ratio of 3:1, and a temperature of 315°C (**Equation 3**)<sup>11</sup>. H<sub>2</sub> essential for methanol production is generated through solar electrolysis of water. The maximum

efficiency attained in large-scale alkaline water electrolysis for H<sub>2</sub> generation is approximately 87%, with energy consumption per unit of H<sub>2</sub> produced remaining under 4.1 kW·(h·m<sup>3</sup>)<sup>-1</sup> <sup>12</sup>. Detailed process design of fermentation process is the same as Case A. According to the assumptions for MCFAs production outlined in **Supplementary Table 2**, the total fermentation volume was 2,525 m<sup>3</sup>. The stoichiometric equations for bioreactors in the Aspen Plus simulations are obtained from **Equation 1**.

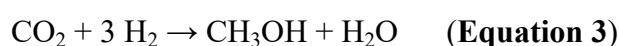

In the CH<sub>4</sub>-based scenario (**Supplementary Fig. 5**), *Methylotheobacterium buryatense* is employed for MCFA production, with CH<sub>4</sub> as the carbon source. The proposed fermentation process for this research encompasses *M. buryatense* biomass generation and MCFAs production, attaining a carbon utilization rate of 60% <sup>13</sup>. Although no published data exists for MCFA production from CH<sub>4</sub>, estimates were based on long-chain fatty acid production from methane and glucose. The estimated titer for MCFAs is 0.25 g·L<sup>-1</sup>, with a productivity of 0.005 g·(L·h)<sup>-1</sup>, and the MCFAs content is 14.24% (**Supplementary Table 2, Supplementary Table 42**)<sup>4,14</sup>. The total fermentation volume for this pathway is 2,666 m<sup>3</sup> (**Supplementary Table 2**). The stoichiometric equations for bioreactors in the Aspen Plus simulations are derived from **Equation 4**.

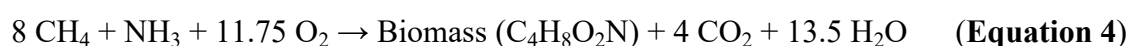

### **Supplementary Note 3. Detailed downstream process design**

After fermentation, biomass is separated from the liquid phase and transferred to the MCFAs purification subprocess, which includes biomass recovery, cell disruption,

solvent extraction, and distillation to isolate the target products (**Supplementary Fig. 6–10, Supplementary Tables 43–47**). Biomass recovery is achieved with 90% efficiency using a combination of chitosan flocculation and dissolved air flotation (DAF)<sup>15</sup>. The cleared broth is then condensed in an evaporator. Once the biomass is separated, the next step is cell disruption to release intracellular MCFA metabolites, a crucial process as MCFAs is typically stored within the microbial cells. Homogenization, a mechanical method for disrupting cells, is commonly employed, with techniques like high-pressure homogenization. This ensures effective cell rupture and maximum release of MCFA compounds<sup>16</sup>. Following cell disruption, MCFAs are recovered using liquid-liquid extraction, a method where organic solvents are used to selectively dissolve MCFAs while leaving water-soluble impurities behind. In this study, hexane was selected as the solvent due to its high efficiency in extracting non-polar fatty acids. The extraction process is typically carried out at a solvent-to-broth ratio of 1:1 to 1:3, with extraction at ambient temperature, followed by phase separation. The organic phase, which contains the MCFAs, is then isolated<sup>17</sup>. It is worth mentioning that the extractant can be recovered and reused through subsequent distillation steps with a recovery rate of more than 99%, so its investment as a raw material is negligible. After recovery, the MCFA mixture undergoes fractional distillation to separate individual fatty acids, such as caproic acid, caprylic acid, capric acid, lauric acid, and mixed MCFAs. The distillation process ensures the production of high-purity MCFAs, which is crucial for industrial applications. This step involves heating the organic extract to temperatures between 180–220°C under reduced pressure, enabling the separation of fatty acids based on their boiling points. Distillation is followed by further purification steps to achieve the desired product purity.

All wastewater flows to the anaerobic digestion units to optimize the energy efficiency of the feedstocks and to reclaim the cooling water. The methane produced from the anaerobic digestion process is completely combusted in an on-site combustor to create energy locally in the utilities subprocess. The liquid effluent from anaerobic digestion consists of carbonates, solid sludge, nitrogen, and water. The output generated from the anaerobic digestion process is abundant in nitrogen nutrients, rendering it a valuable by-product for fertilization<sup>15</sup>.

Utilities provide comprehensive integration of energy, water, and power, encompassing a cooling water system, chilled water system, process water manifold, and power systems. The entire power requirements of the system are ascertained in this area. The methane generated from the anaerobic digestion process is entirely combusted in an on-site combustor to produce electricity locally<sup>15</sup>.

#### **Supplementary Note 4. Breakdown of minimum selling prices**

As shown in the **Supplementary Fig. 13** and **Supplementary Tables 26–30**, the breakdown of MSP for caproic acid, capric acid, lauric acid, and mixed MCFAs demonstrates the competitive edge of CO<sub>2</sub> and CH<sub>4</sub>-based production methods. For all products, the MSP for CO<sub>2</sub> and CH<sub>4</sub>-based pathways is consistently lower than or near the market price (**Supplementary Table 25**), reflecting their cost-effectiveness due to lower raw material costs and higher process efficiency. In contrast, fossil-derived methanol and glucose feedstocks lead to higher production costs, with MSPs exceeding the market price by significant margins.

For caproic acid, the MSP of C1-based production pathways is notably lower than the market price, with deviations ranging from -1.42% to -5.76%. This underscores the strong economic potential of CO<sub>2</sub> and CH<sub>4</sub> as feedstocks. However, fossil-based methanol and glucose result in MSPs that exceed market prices by approximately 119.8% and 67.99%, respectively. In the case of capric acid, lauric acid, and mixed MCFAs, the economic outlook remains less favourable, primarily due to the lower added value of these products, which results in relatively lower revenue under identical production conditions. Nevertheless, C1-based products still show a clear economic advantage, with deviations from the market price significantly smaller than those observed for fossil-based alternatives.

These results highlight the critical role of feedstock selection in determining the economic sustainability of MCFAs production. CO<sub>2</sub> and CH<sub>4</sub> are not only more cost-effective but also contribute to sustainability goals, while fossil-based feedstocks present ongoing economic and environmental challenges. The findings further

demonstrate the potential of C1-based pathways to replace traditional fossil-based processes, offering substantial reductions in production costs and enhancing the competitiveness of bio-based chemicals. Furthermore, integrating these renewable feedstocks with advancing carbon capture and utilization technologies could further reduce costs, solidifying CO<sub>2</sub> and CH<sub>4</sub> as increasingly viable alternatives to conventional carbon sources.

## **Supplementary Note 5.** Net income profiles MCFAs

**Supplementary Fig. 14** and **Supplementary Tables 31–35** illustrates the net income profiles of MCFAs production pathways over the plant's lifespan for five different products: caproic acid, caprylic acid, capric acid, lauric acid, and mixed MCFAs. The net income profiles are depicted as cumulative values over time, highlighting the financial performance of each pathway under varying conditions. The analysis shows that the net income increases steadily over the plant's lifespan, with all production pathways initially experiencing a similar upward trend. However, the CO<sub>2</sub> and CH<sub>4</sub>-based pathways consistently outperform fossil-based feedstocks, achieving a higher net income earlier in the process. The fossil-derived methanol and glucose pathways lag due to higher raw material and operational costs, which are reflected in their slower climb towards profitability. The net income gap between C1-based production and fossil-based production grows over time, suggesting that C1 as a feedstock provides a more sustainable and economically favourable route for MCFAs production.

## Supplementary Note 6. Carbon tax influence

The trend of the MSP changes for caprylic acid in response to varying carbon tax rates can be found on **Supplementary Fig. 15**. The MSP decreases with increasing carbon tax, following a linear trend. The fitted curve represents the relationship between the carbon tax level, ranging from \$0 to approximately  $\$140 \cdot \text{ton}^{-1}$  of  $\text{CO}_2$ , and the MSP of caprylic acid. It is evident that as the carbon tax rate rises, the MSP for caprylic acid steadily declines. This trend suggests that carbon tax policies could incentivize more cost-effective production of target product by reducing the reliance on fossil-derived raw materials, thus lowering production costs. Specifically, at a carbon tax rate of  $\$140 \cdot \text{ton}^{-1}$ , the MSP approaches a minimum value, showing a significant reduction compared to the initial price when no carbon tax is applied. The decrease in MSP under the influence of higher carbon taxes is due to the decreased reliance on more expensive, carbon-intensive raw materials, such as fossil fuels, which are more sensitive to carbon pricing. By incentivizing the use of lower-carbon feedstocks, such as  $\text{CO}_2$  and  $\text{CH}_4$ , higher carbon taxes could make renewable-based production of caprylic acid more competitive. This trend is consistent with findings in previous studies that demonstrate how carbon pricing can stimulate the adoption of low-carbon technologies and contribute to the overall sustainability of biomanufacturing<sup>18,19</sup>.

## **Supplementary Note 7. Methane price influence**

**Supplementary Fig. 16** illustrates the trend of the MSP changes for caprylic acid (Case E2) in response to varying CH<sub>4</sub> prices. The fitted curve indicates a clear, positive correlation between the price of CH<sub>4</sub> and the MSP of caprylic acid, showing that as CH<sub>4</sub> prices increase, the MSP also rises. It is evident that small increases in CH<sub>4</sub> prices lead to relatively consistent increases in MSP. This emphasizes the importance of controlling CH<sub>4</sub> prices or seeking alternative, lower-cost CH<sub>4</sub> sources to maintain competitive production costs. In scenarios where CH<sub>4</sub> prices reach higher levels, as seen in some regions or different sources, the MSP may increase substantially, potentially reducing the market competitiveness of caprylic acid produced via methane-based pathways (**Supplementary Tables 38–39**). These findings further reinforce the importance of selecting cost-effective feedstocks for biomanufacturing, as fluctuations in raw material prices can significantly affect the economic performance of bio-based processes. The results also suggest that further research and development efforts are needed to stabilize CH<sub>4</sub> pricing or explore alternative CH<sub>4</sub> sources to mitigate the impact of rising costs on the overall production process.

## Supplementary Figures

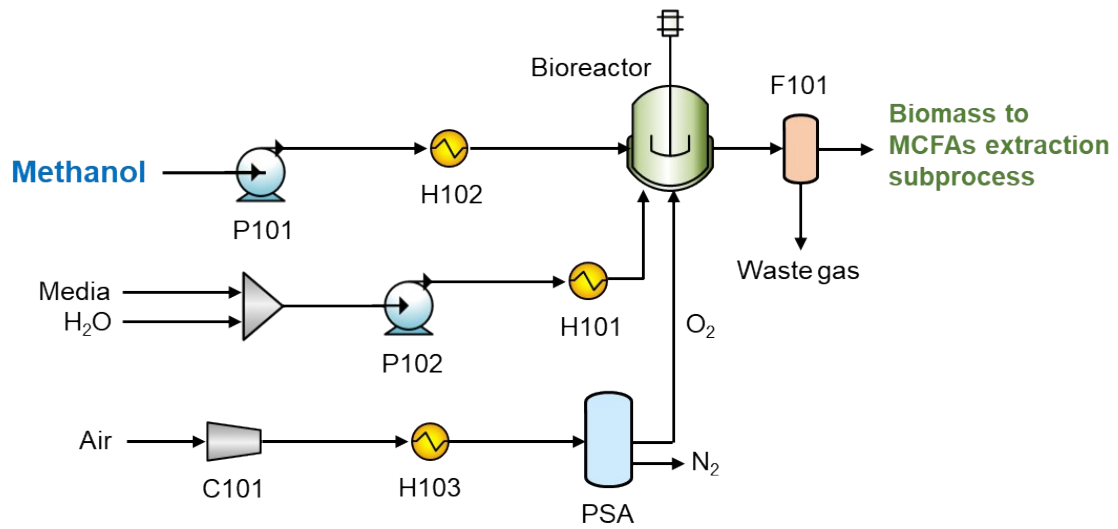

**Supplementary Fig. 1.** Upstream processing units to produce biomass production from fossil coal-based methanol.

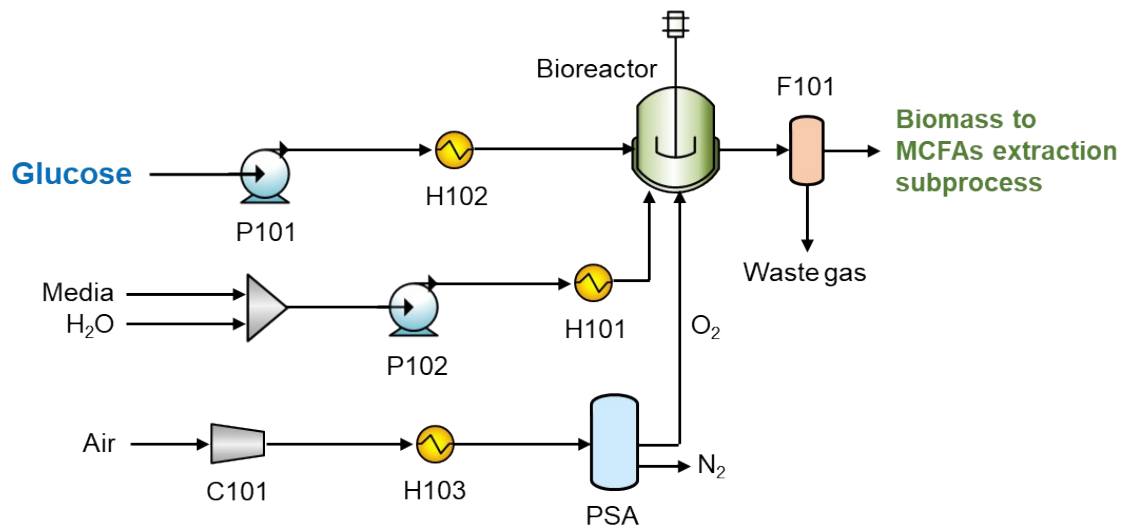

**Supplementary Fig. 2.** Upstream processing units to produce biomass production from glucose.

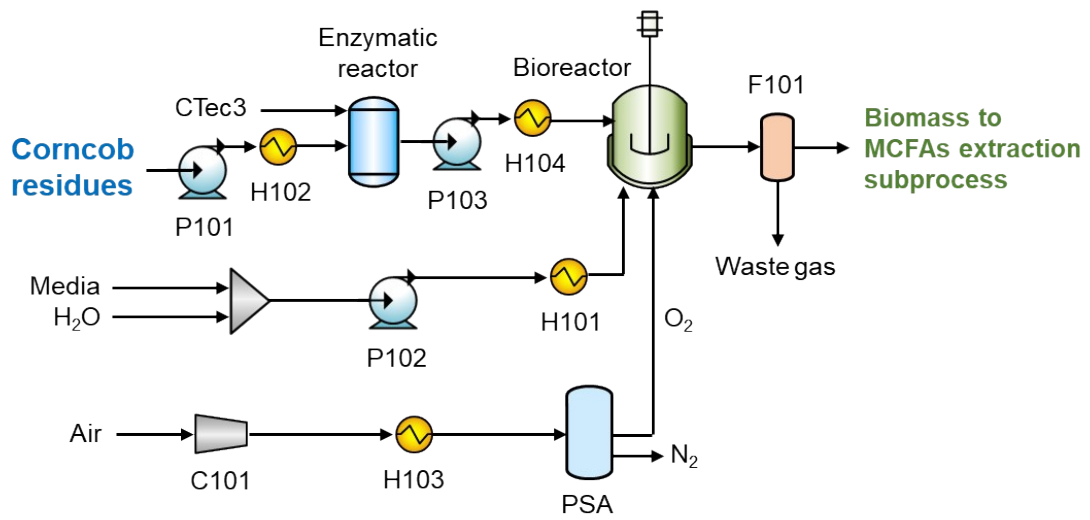

**Supplementary Fig. 3.** Upstream processing units to produce biomass production from corncob residues.

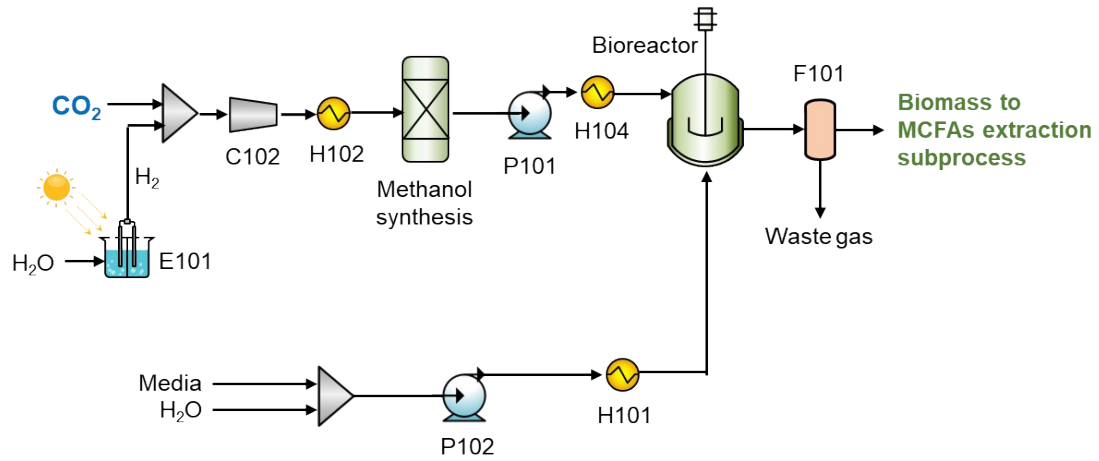

**Supplementary Fig. 4.** Upstream processing units to produce biomass production from carbon dioxide.

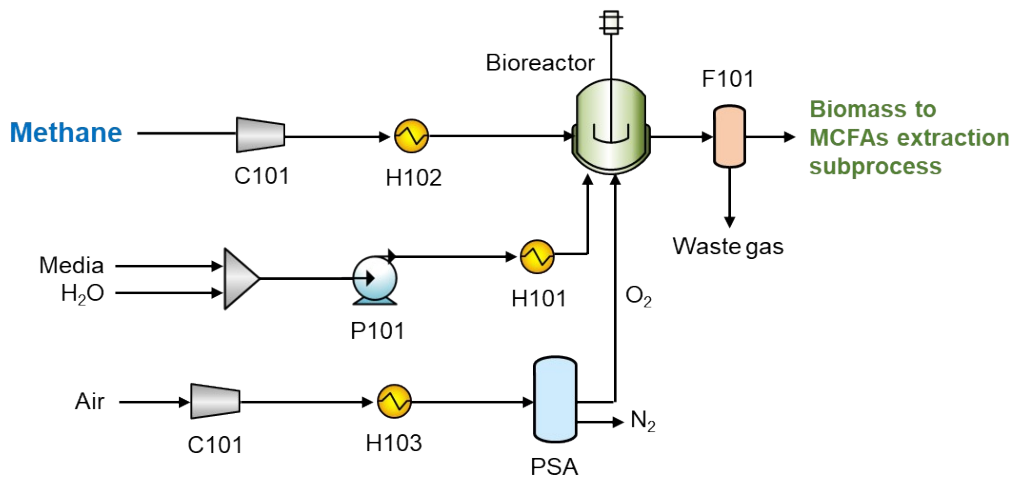

**Supplementary Fig. 5.** Upstream processing units to produce biomass production from methane.

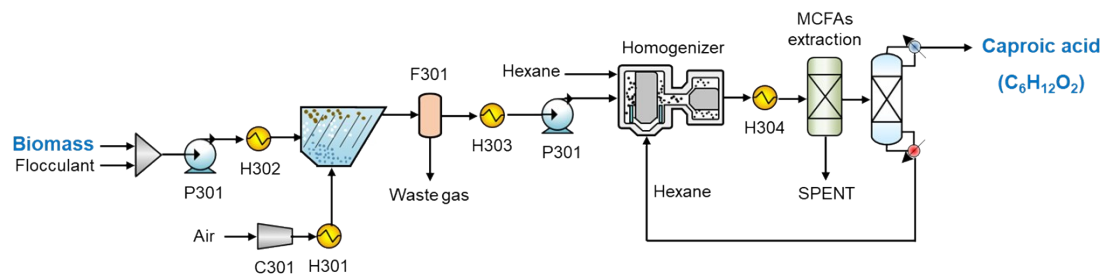

**Supplementary Fig. 6.** Downstream processing units to produce caproic acid.

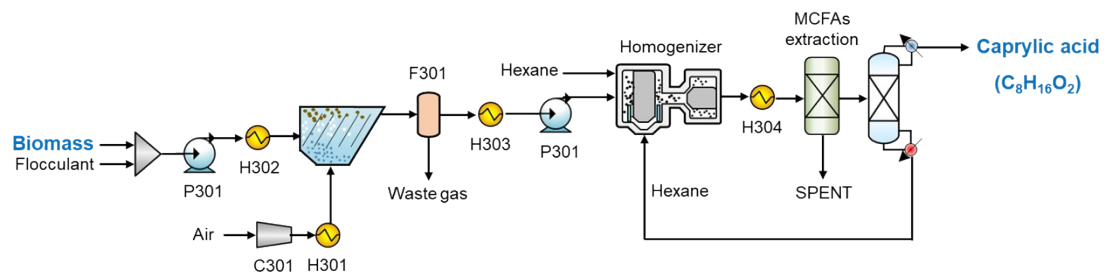

**Supplementary Fig. 7.** Upstream processing units to produce caprylic acid.



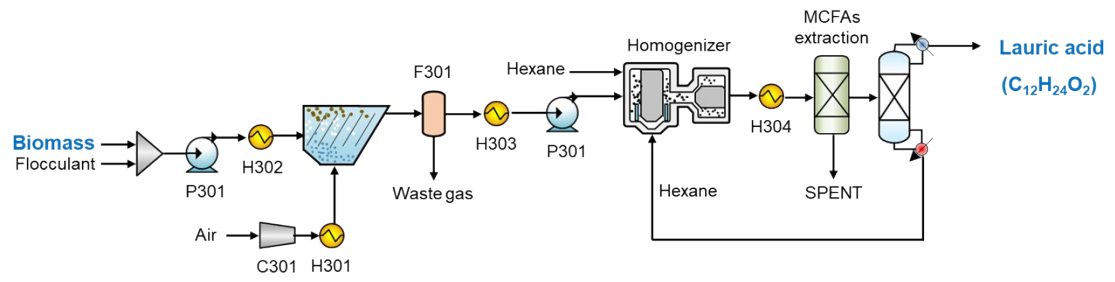

**Supplementary Fig. 9.** Upstream processing units to produce lauric acid.

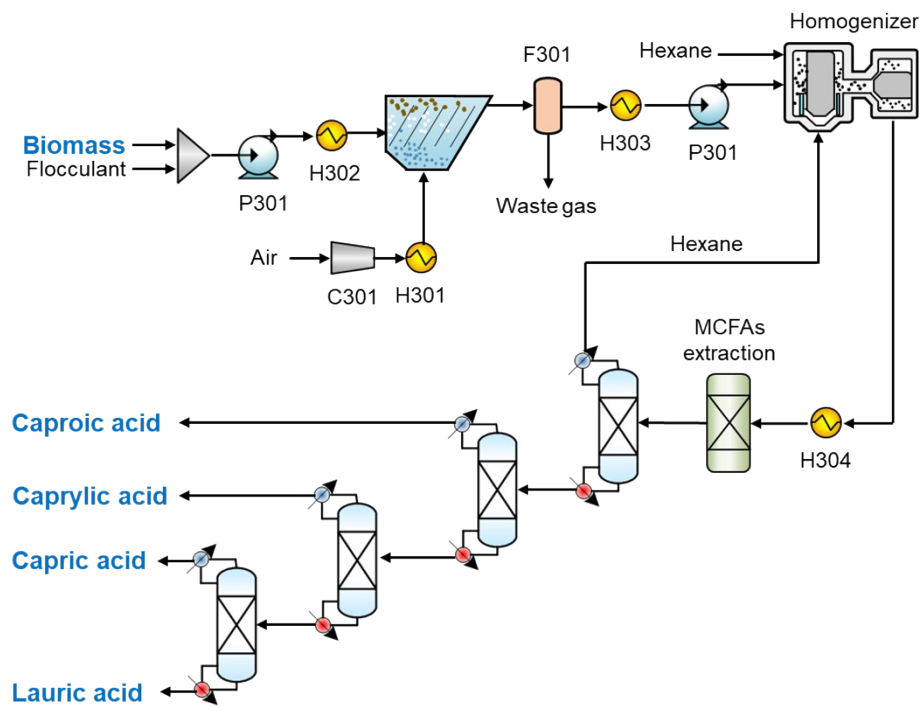

**Supplementary Fig. 10.** Upstream processing units to produce mixed medium-chain fatty acids.

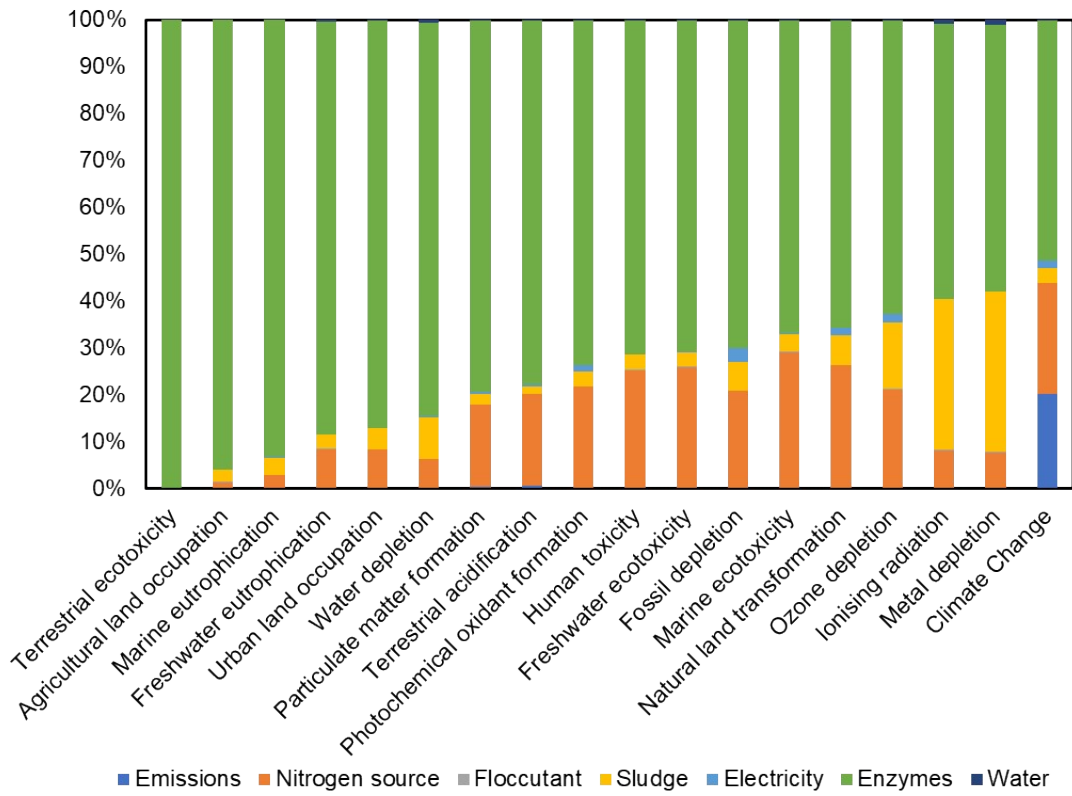

**Supplementary Fig. 11.** Breakdown of environmental impacts for MCFAs ( $C_6H_{12}O_2$ ) production from corncob residues.

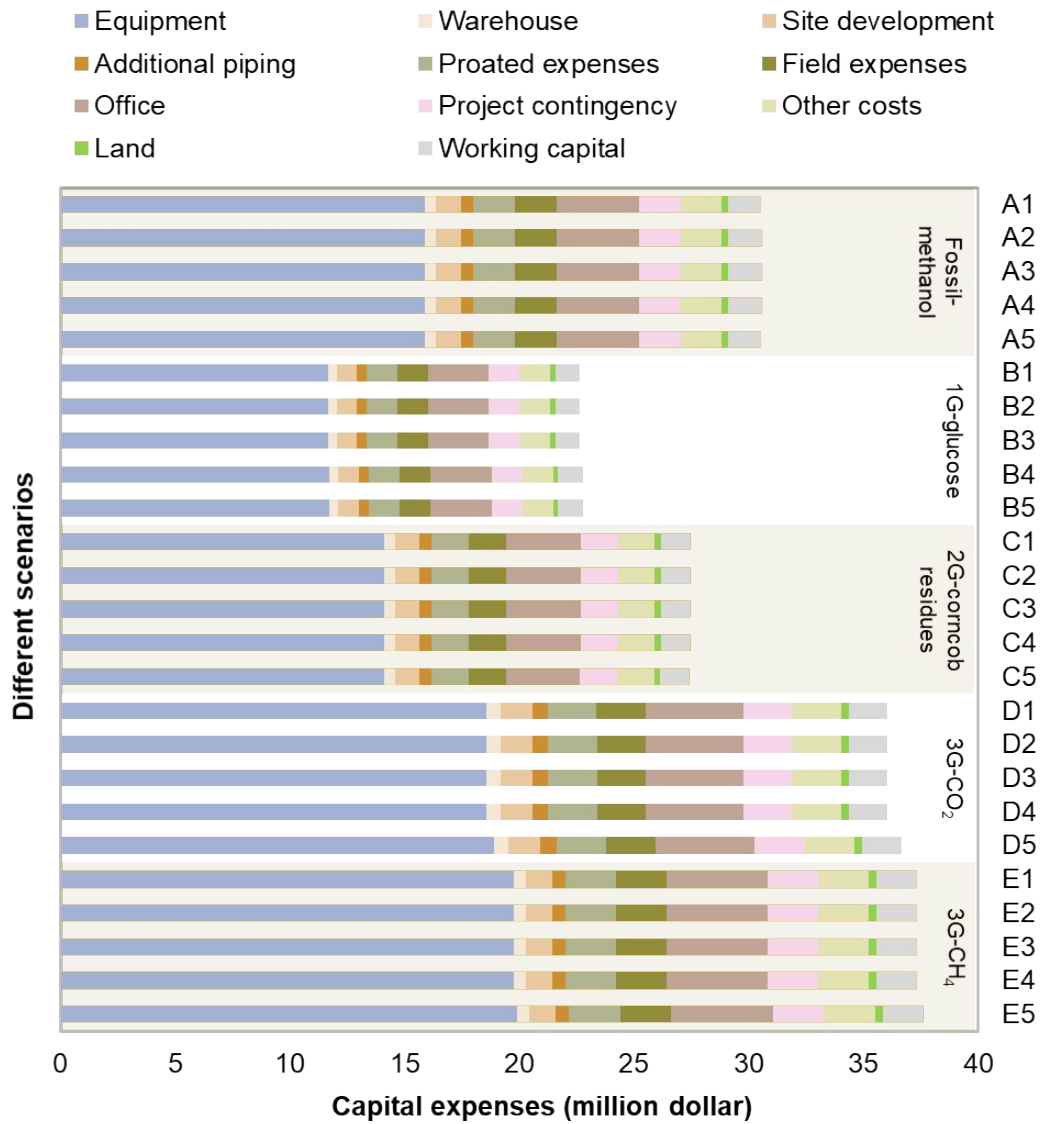

**Supplementary Fig. 12.** Breakdown of capital expenses across key categories for five feedstock scenarios.

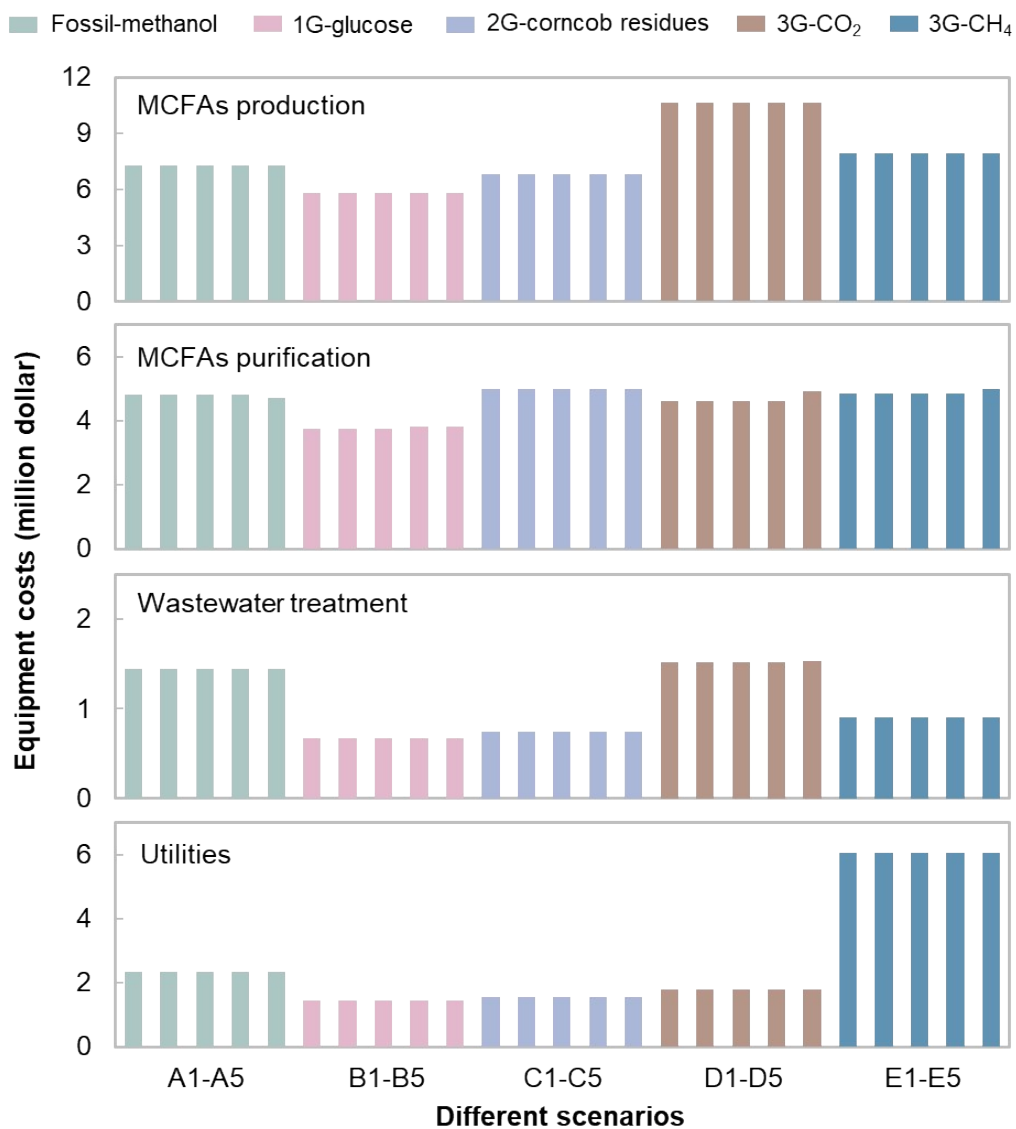

**Supplementary Fig. 13.** Detailed comparison of equipment and installation costs for MCFAs production, purification, wastewater treatment, and utilities.

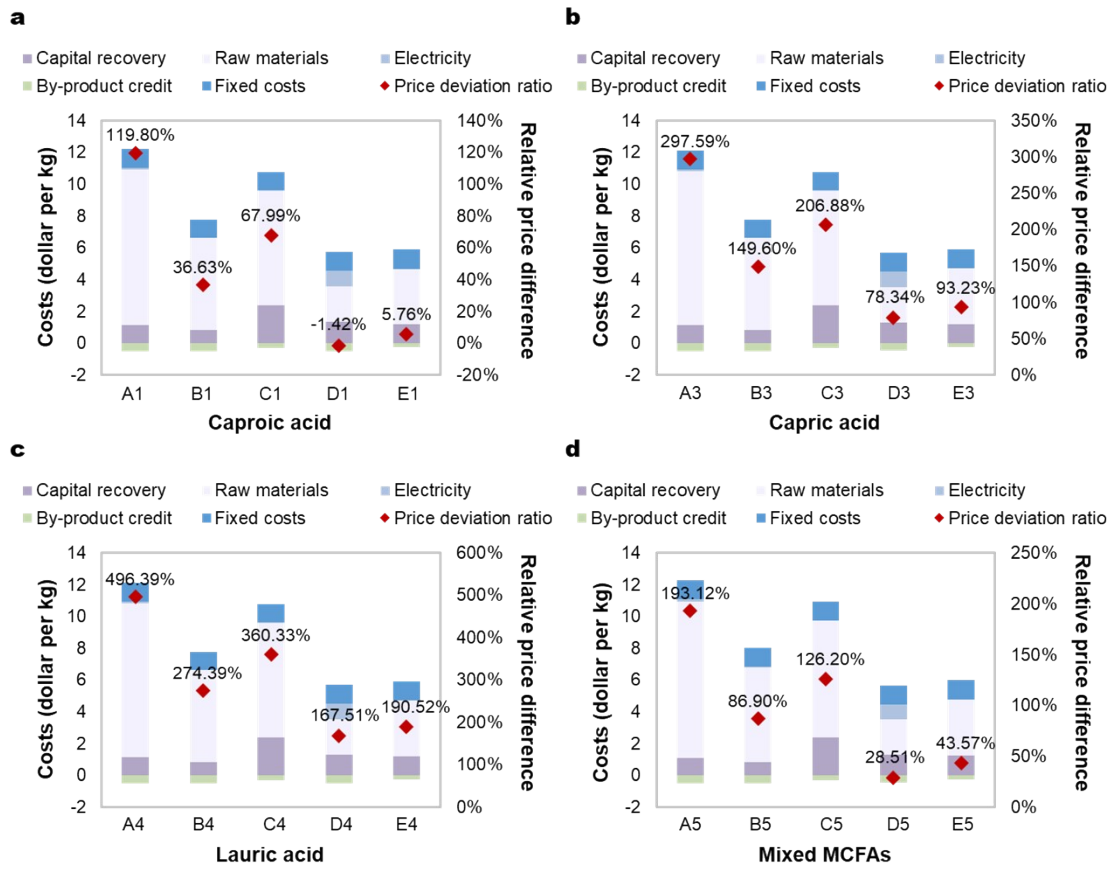

**Supplementary Fig. 14.** Breakdown of minimum selling prices (MSP) and deviation from market price for caproic acid (a), capric acid (b), lauric acid (c), mixed medium-chain fatty acids (d).

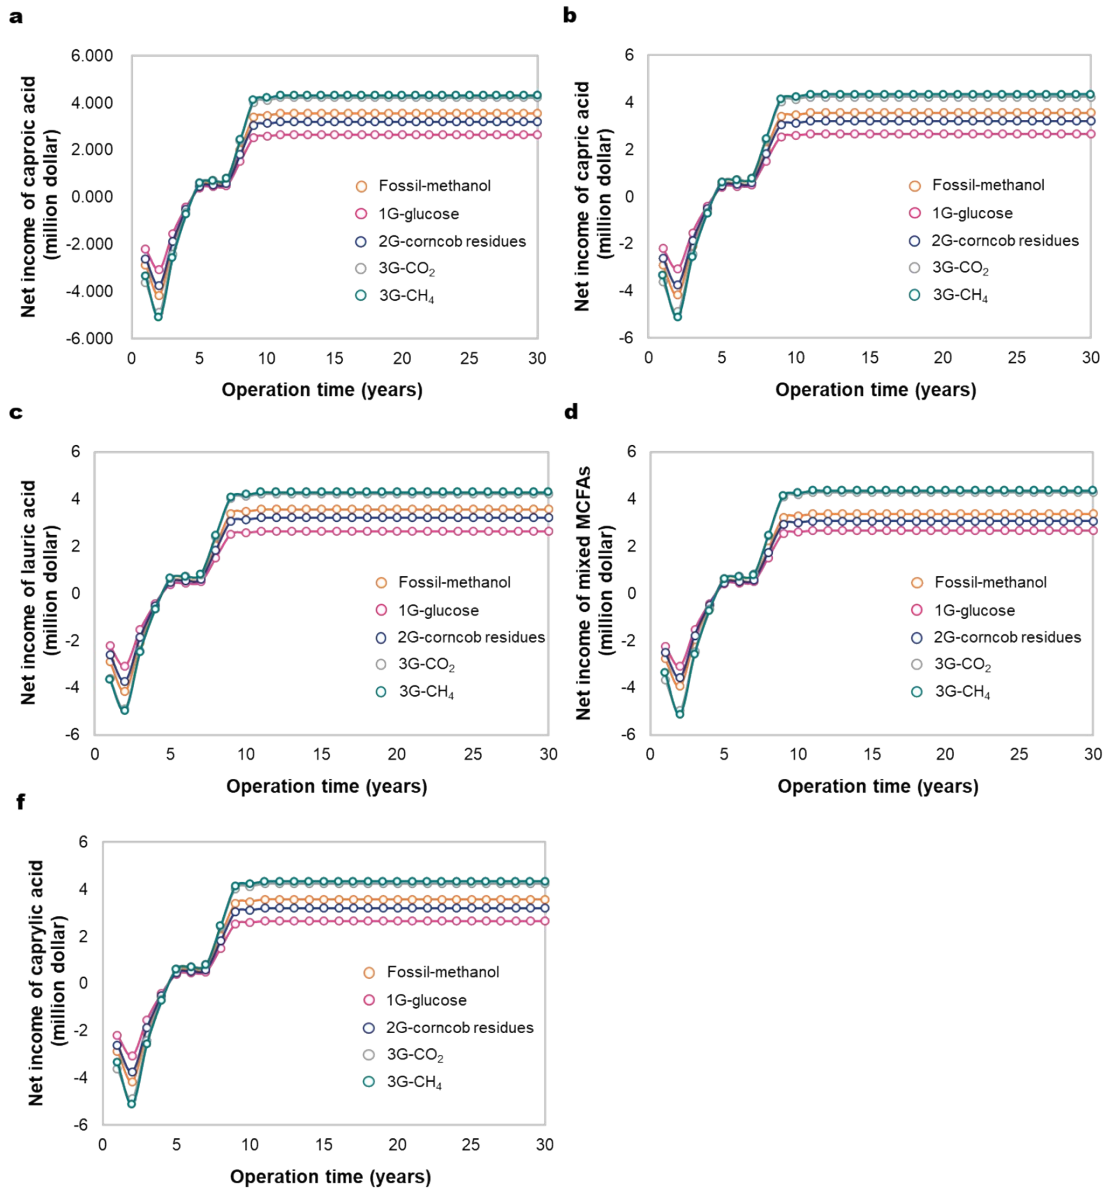

**Supplementary Fig. 15.** Net income profiles of medium-chain fatty acids (MCFAs) production pathways during the plant's lifespan. (a) caproic acid, (b) capric acid, (c) lauric acid, (d) mixed MCFAs, (f) caprylic acid.

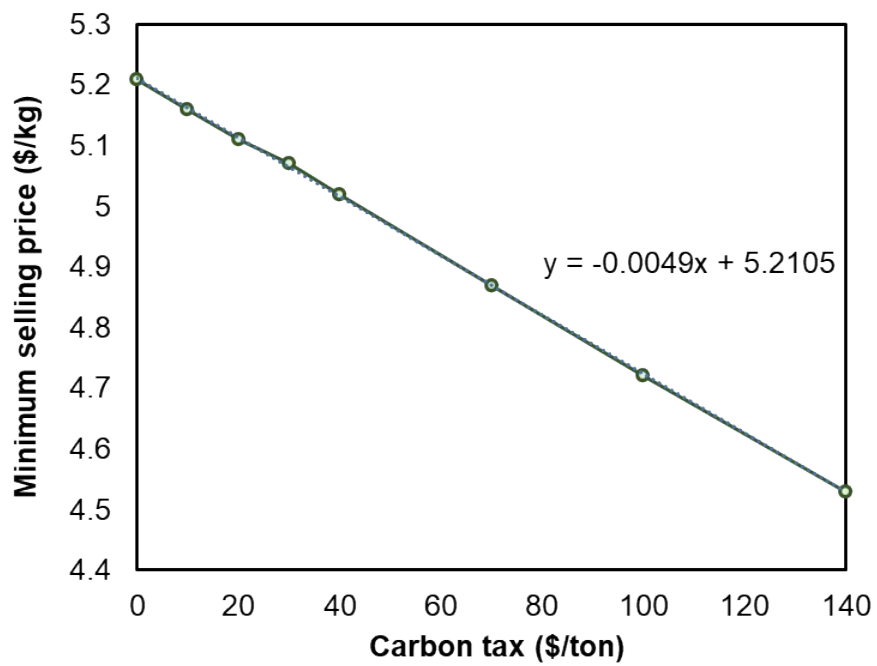

**Supplementary Fig. 16.** Trend of caprylic acid minimum selling price changes under the influence of carbon tax.

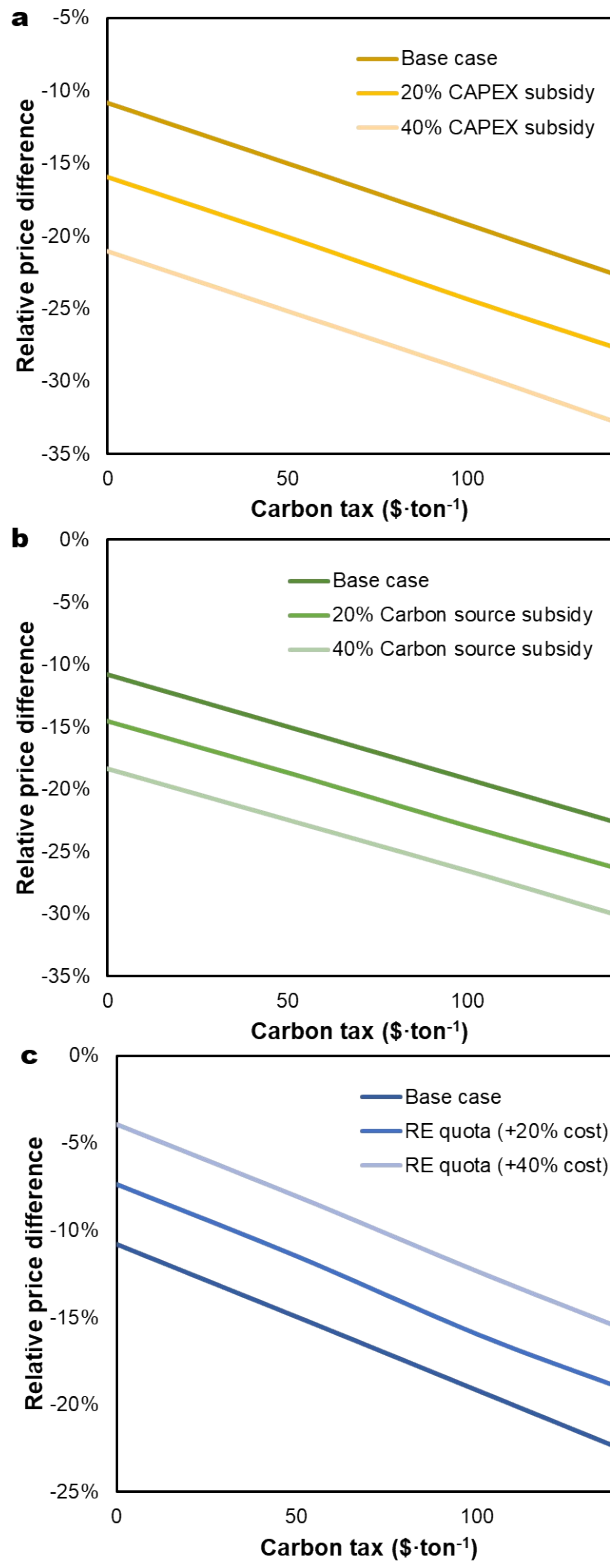

**Supplementary Fig. 17.** Sensitivity of MCFAs economic competitiveness to synergistic policy landscapes. a. Impact of capital expenses (CAPEX) subsidies combined with carbon taxes on the relative price difference. b. Synergistic effects of operating expenses (OPEX) subsidies and carbon taxes. c. Sensitivity of production costs to electricity price premiums driven by renewable energy (RE) quotas.

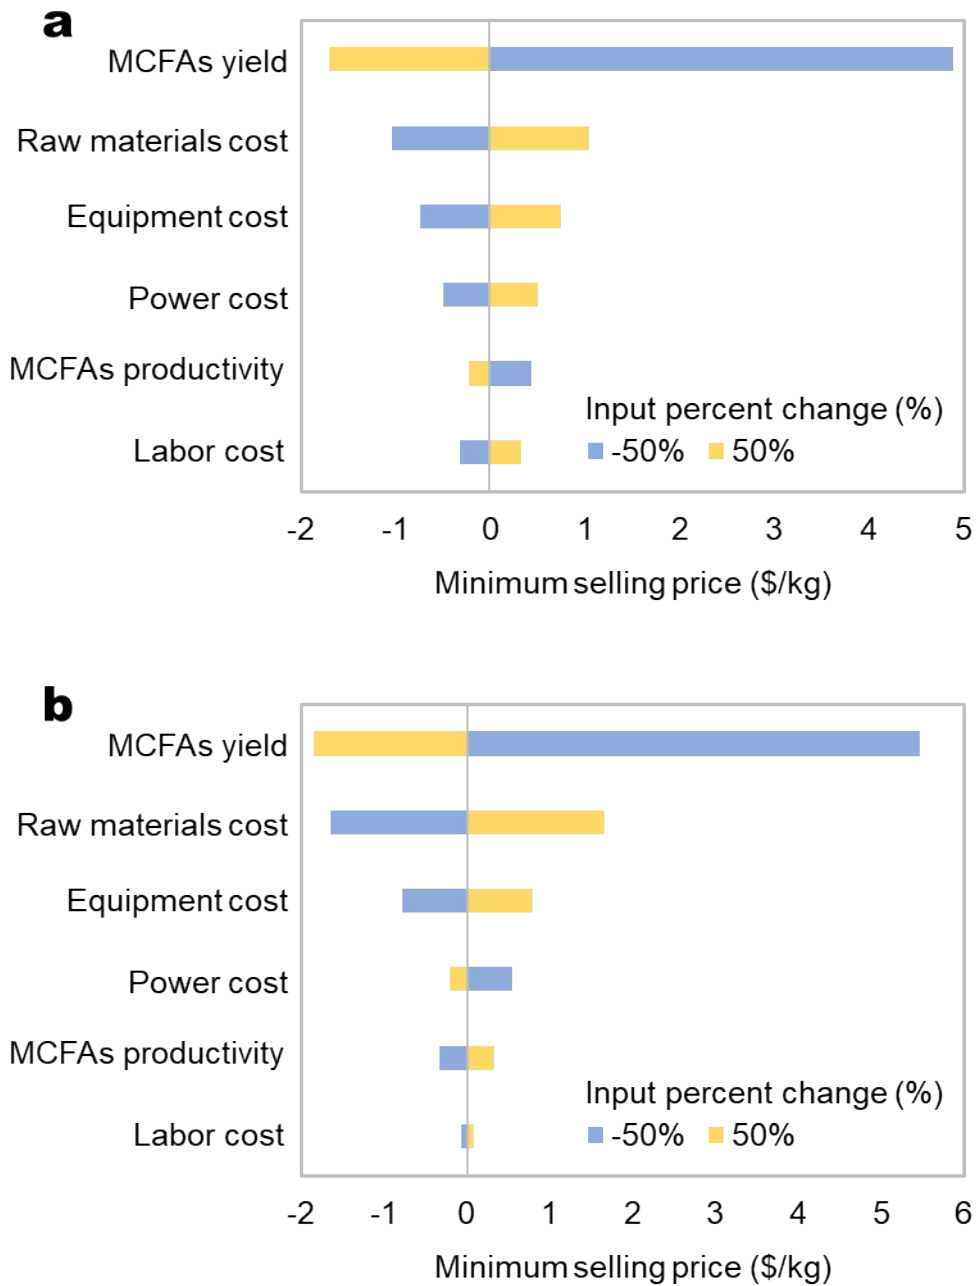

**Supplementary Fig. 18.** (a) Sensitivity analysis of MSP for the 3G-CO<sub>2</sub> pathway to variations in key process parameters. (b) Sensitivity analysis of MSP for the 3G-CH<sub>4</sub> pathway to variations in key process parameters.

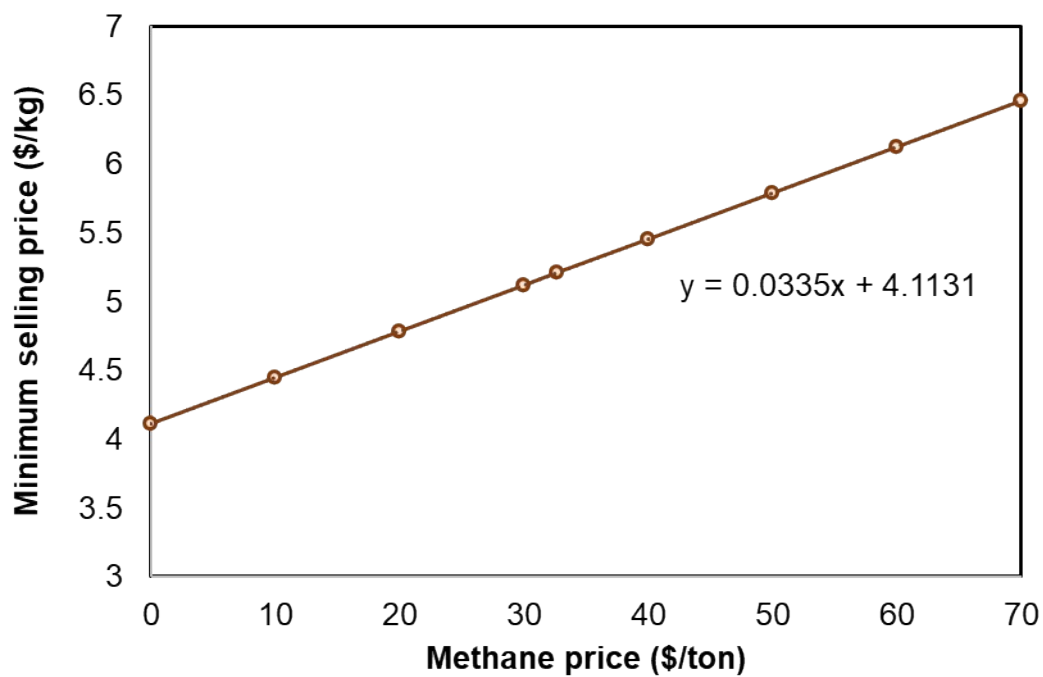

**Supplementary Fig. 19.** Trend of caprylic acid minimum selling price changes under the influence of methane price.

## Supplementary Tables

**Supplementary Table 1.** 25 unique production pathways for medium-chain fatty acids (MCFAs) biomanufacturing, integrating five categories of feedstock-to-biomass routes (Cases A–E) with five MCFAs composition (Cases 1–5).

| Case studies                                                      | Coal (Case A) | Glucose (Case B) | Corn cob residues (Case C) | CO <sub>2</sub> (Case D) | CH <sub>4</sub> (Case E) |
|-------------------------------------------------------------------|---------------|------------------|----------------------------|--------------------------|--------------------------|
| Caproic acid (Case 1)                                             | A1            | B1               | C1                         | D1                       | E1                       |
| Caprylic acid (Case 2)                                            | A2            | B2               | C2                         | D2                       | E2                       |
| Capric acid (Case 3)                                              | A3            | B3               | C3                         | D3                       | E3                       |
| Lauric acid (Case 4)                                              | A4            | B4               | C4                         | D4                       | E4                       |
| Caproic acid + caprylic acid + capric acid + lauric acid (Case 5) | A5            | B5               | C5                         | D5                       | E5                       |

**Supplementary Table 2.** Assumptions for the medium-chain fatty acids (MCFAs) production from unique production pathways.

| Parameter                                        | Case A: methanol                                                                    | Case B: glucose     | Case C: corncob residues              | Case D: CO <sub>2</sub>                 | Case E: CH <sub>4</sub>                   |
|--------------------------------------------------|-------------------------------------------------------------------------------------|---------------------|---------------------------------------|-----------------------------------------|-------------------------------------------|
| Carbon source inflow, kg/h                       | 8,700                                                                               | 4,000               | 5,300                                 | 13,000 <sup>20</sup>                    | 6,200                                     |
| Carbon-to-biomass rate, %                        | 86 <sup>3</sup>                                                                     | 90 <sup>7</sup>     | 90 <sup>7</sup>                       | 86 <sup>3</sup>                         | 60 <sup>13</sup>                          |
| MCFAs titer, g/L                                 | 2.66 <sup>4,5</sup>                                                                 | 3.8 <sup>8</sup>    | 0.45 <sup>21</sup>                    | 2.66 <sup>4,5</sup>                     | 0.25                                      |
| MCFAs productivity, g/(L·h)                      | 0.13 <sup>4,5</sup>                                                                 | 0.16 <sup>8</sup>   | 0.01 <sup>21</sup>                    | 0.13 <sup>4,5</sup>                     | 0.005                                     |
| MCFAs estimated productivity, g/(L·h)            | 1.0                                                                                 | 1.0                 | 1.0                                   | 1.0                                     | 1.0                                       |
| MCFAs content, %                                 | 15% <sup>4</sup>                                                                    | 21.05% <sup>9</sup> | 17.5% <sup>10</sup>                   | 15% <sup>4</sup>                        | 14.24% <sup>14</sup>                      |
| Culture condition                                | <i>P. pastoris</i> , 30 °C <sup>5</sup> <i>E. coli</i> , 37 °C <sup>8</sup>         |                     | <i>P. putida</i> , 30 °C <sup>5</sup> | <i>P. pastoris</i> , 30 °C <sup>5</sup> | <i>M. buryatense</i> , 30 °C <sup>8</sup> |
| MCFAs composition                                | Case 1: 100% Caproic acid (C <sub>6</sub> H <sub>12</sub> O <sub>2</sub> )          |                     |                                       |                                         |                                           |
|                                                  | Case 2: 100% Caprylic acid (C <sub>8</sub> H <sub>16</sub> O <sub>2</sub> )         |                     |                                       |                                         |                                           |
|                                                  | Case 3: 100% Capric acid (C <sub>10</sub> H <sub>20</sub> O <sub>2</sub> )          |                     |                                       |                                         |                                           |
|                                                  | Case 4: 100% Lauric acid (C <sub>12</sub> H <sub>24</sub> O <sub>2</sub> )          |                     |                                       |                                         |                                           |
|                                                  | Case 5: caproic acid: caprylic acid: capric acid: lauric acids = 25%: 25%: 25%: 25% |                     |                                       |                                         |                                           |
| Nominal volume of bioreactors volume             | Nominal volume = 240 m <sup>3</sup> , Maximum working volume = 300 m <sup>3</sup>   |                     |                                       |                                         |                                           |
| Total fermentation liquid volume, m <sup>3</sup> | 2,588                                                                               | 1,808               | 2,173                                 | 2,525                                   | 2,666                                     |
| Annual production capacity, tons                 | 3,000                                                                               | 3,000               | 3,000                                 | 3,000                                   | 3,000                                     |

**Supplementary Table 3.** Life cycle inventory data of MCFAs production from fossil-based methanol. FU: functional unit.

| <b>Input</b>              | <b>Case A1</b> | <b>Case A2</b> | <b>Case A3</b> | <b>Case A4</b> | <b>Case A5</b> | <b>Unit</b> |
|---------------------------|----------------|----------------|----------------|----------------|----------------|-------------|
| Methanol                  | 23.3894        | 23.1582        | 23.1559        | 23.1556        | 23.5567        | kg / FU     |
| Ammonia                   | 1.2594         | 1.2469         | 1.2468         | 1.2468         | 1.2684         | kg / FU     |
| Flocculant                | 0.0068         | 0.0067         | 0.0067         | 0.0067         | 0.0068         | kg / FU     |
| Water                     | 157.4223       | 155.8659       | 155.8509       | 155.8485       | 158.5480       | kg / FU     |
| Electricity               | 3.9322         | 3.8933         | 3.8929         | 3.8929         | 4.9907         | kwh / FU    |
| <b>Output</b>             | <b>Case A1</b> | <b>Case A2</b> | <b>Case A3</b> | <b>Case A4</b> | <b>Case A5</b> | <b>Unit</b> |
| Caproic acid              | 1.0000         |                |                |                | 0.1830         | kg / FU     |
| Caprylic acid             |                | 1.0000         |                |                | 0.2272         | kg / FU     |
| Capric acid               |                |                | 1.0000         |                | 0.2711         | kg / FU     |
| Lauric acid               |                |                |                | 1.0000         | 0.3187         | kg / FU     |
| Mixed                     | 1.0000         | 1.0000         | 1.0000         | 1.0000         | 1.0000         | FU          |
| Sludge                    | 173.5626       | 171.8467       | 171.8301       | 171.8275       | 174.1385       | kg / FU     |
| NH <sub>3</sub>           | 0.0008         | 0.0008         | 0.0008         | 0.0008         | 0.0001         | kg / FU     |
| CO <sub>2</sub> emissions | 18.5380        | 18.3547        | 18.3530        | 18.3527        | 18.5102        | kg / FU     |

**Supplementary Table 4.** Life cycle inventory data of MCFAs production from glucose. FU: functional unit.

| <b>Input</b>              | <b>Case B1</b> | <b>Case B2</b> | <b>Case B3</b> | <b>Case B4</b> | <b>Case B5</b> | <b>Unit</b> |
|---------------------------|----------------|----------------|----------------|----------------|----------------|-------------|
| Glucose                   | 10.4734        | 10.4746        | 10.4736        | 10.4734        | 10.6548        | kg / FU     |
| Ammonia                   | 0.8895         | 0.8896         | 0.8895         | 0.8895         | 0.9049         | kg / FU     |
| Flocculant                | 0.0048         | 0.0048         | 0.0048         | 0.0048         | 0.0049         | kg / FU     |
| Water                     | 111.1831       | 111.1960       | 111.1852       | 111.1835       | 113.1097       | kg / FU     |
| Electricity               | 1.0938         | 1.0939         | 1.0938         | 1.0938         | 1.1197         | kwh / FU    |
| <b>Output</b>             | <b>Case B1</b> | <b>Case B2</b> | <b>Case B3</b> | <b>Case B4</b> | <b>Case B5</b> | <b>Unit</b> |
| Caproic acid              | 1.0000         |                |                |                | 0.1830         | kg / FU     |
| Caprylic acid             |                | 1.0000         |                |                | 0.2272         | kg / FU     |
| Capric acid               |                |                | 1.0000         |                | 0.2711         | kg / FU     |
| Lauric acid               |                |                |                | 1.0000         | 0.3187         | kg / FU     |
| Mixed                     | 1.0000         | 1.0000         | 1.0000         | 1.0000         | 1.0000         | FU          |
| Sludge                    | 111.6710       | 111.6839       | 111.6730       | 111.6713       | 113.5557       | kg / FU     |
| NH <sub>3</sub>           | 0.0006         | 0.0006         | 0.0006         | 0.0006         | 0.0006         | kg / FU     |
| CO <sub>2</sub> emissions | 6.4539         | 6.4546         | 6.4540         | 6.4539         | 6.5597         | kg / FU     |

**Supplementary Table 5.** Life cycle inventory data of MCFAs production from corncob residues. FU: functional unit.

| <b>Input</b>              | <b>Case C1</b> | <b>Case C2</b> | <b>Case C3</b> | <b>Case C4</b> | <b>Case C5</b> | <b>Unit</b> |
|---------------------------|----------------|----------------|----------------|----------------|----------------|-------------|
| Corn cob residues         | 13.9644        | 13.9660        | 13.9647        | 13.9645        | 14.2064        | kg / FU     |
| CTec3                     | 1.3964         | 1.3966         | 1.3965         | 1.3964         | 1.4206         | kg / FU     |
| Ammonia                   | 1.0674         | 1.0675         | 1.0674         | 1.0674         | 1.0858         | kg / FU     |
| Flocculant                | 0.0058         | 0.0058         | 0.0058         | 0.0058         | 0.0059         | kg / FU     |
| Water                     | 133.4193       | 133.4347       | 133.4217       | 133.4197       | 135.7312       | kg / FU     |
| Electricity               | 0.6718         | 0.6719         | 0.6719         | 0.6718         | 0.6835         | kwh / FU    |
| <b>Output</b>             | <b>Case C1</b> | <b>Case C2</b> | <b>Case C3</b> | <b>Case C4</b> | <b>Case C5</b> | <b>Unit</b> |
| Caproic acid              | 1.0000         |                |                |                | 0.1830         | kg / FU     |
| Caprylic acid             |                | 1.0000         |                |                | 0.2272         | kg / FU     |
| Capric acid               |                |                | 1.0000         |                | 0.2711         | kg / FU     |
| Lauric acid               |                |                |                | 1.0000         | 0.3187         | kg / FU     |
| Mixed                     | 1.0000         | 1.0000         | 1.0000         | 1.0000         | 1.0000         | FU          |
| Sludge                    | 134.0557       | 134.0712       | 134.0582       | 134.0562       | 136.3787       | kg / FU     |
| NH <sub>3</sub>           | 0.0006         | 0.0006         | 0.0006         | 0.0006         | 0.0006         | kg / FU     |
| CO <sub>2</sub> emissions | 7.7799         | 7.7808         | 7.7801         | 7.7799         | 7.9147         | kg / FU     |

**Supplementary Table 6.** Life cycle inventory data of MCFAs production from carbon dioxide. FU: functional unit.

| <b>Input</b>              | <b>Case D1</b> | <b>Case D2</b> | <b>Case D3</b> | <b>Case D4</b> | <b>Case D5</b> | <b>Unit</b> |
|---------------------------|----------------|----------------|----------------|----------------|----------------|-------------|
| CO <sub>2</sub>           | 33.8177        | 33.4834        | 33.4802        | 33.4797        | 32.9549        | kg / FU     |
| Ammonia                   | 1.2596         | 1.2472         | 1.2471         | 1.2470         | 1.2275         | kg / FU     |
| Flocculant                | 0.0068         | 0.0067         | 0.0067         | 0.0067         | 0.0066         | kg / FU     |
| Water                     | 157.4543       | 155.8978       | 155.8827       | 155.8803       | 153.4369       | kg / FU     |
| Electricity               | 291.7230       | 288.8391       | 288.8111       | 288.8067       | 280.3042       | kwh / FU    |
| <b>Output</b>             | <b>Case D1</b> | <b>Case D2</b> | <b>Case D3</b> | <b>Case D4</b> | <b>Case D5</b> | <b>Unit</b> |
| Caproic acid              | 1.0000         |                |                |                | 0.1830         | kg / FU     |
| Caprylic acid             |                | 1.0000         |                |                | 0.2272         | kg / FU     |
| Capric acid               |                |                | 1.0000         |                | 0.2711         | kg / FU     |
| Lauric acid               |                |                |                | 1.0000         | 0.3187         | kg / FU     |
| Mixed                     | 1.0000         | 1.0000         | 1.0000         | 1.0000         | 1.0000         | FU          |
| Sludge                    | 191.3408       | 189.4493       | 189.4309       | 189.4281       | 186.2011       | kg / FU     |
| NH <sub>3</sub>           | 0.0007         | 0.0006         | 0.0006         | 0.0006         | 0.0000         | kg / FU     |
| CO <sub>2</sub> emissions | 20.0458        | 19.8476        | 19.8457        | 19.8454        | 19.9221        | kg / FU     |

**Supplementary Table 7.** Life cycle inventory data of MCFAs production from carbon dioxide. FU: functional unit.

| <b>Input</b>              | <b>Case E1</b> | <b>Case E2</b> | <b>Case E3</b> | <b>Case E4</b> | <b>Case E5</b> | <b>Unit</b> |
|---------------------------|----------------|----------------|----------------|----------------|----------------|-------------|
| CH <sub>4</sub>           | 19.4103        | 16.4862        | 16.4846        | 16.5256        | 16.7699        | kg / FU     |
| Ammonia                   | 1.5429         | 1.3105         | 1.3103         | 1.3136         | 1.3330         | kg / FU     |
| Flocculant                | 0.0083         | 0.0071         | 0.0071         | 0.0071         | 0.0072         | kg / FU     |
| Water                     | 192.8623       | 163.8086       | 163.7928       | 164.1998       | 166.6274       | kg / FU     |
| Electricity               | 0.0000         | 0.0000         | 0.0000         | 0.0000         | 0.0000         | kwh / FU    |
| <b>Output</b>             | <b>Case E1</b> | <b>Case E2</b> | <b>Case E3</b> | <b>Case E4</b> | <b>Case E5</b> | <b>Unit</b> |
| Caproic acid              | 1.0000         |                |                |                | 0.1830         | kg / FU     |
| Caprylic acid             |                | 1.0000         |                |                | 0.2272         | kg / FU     |
| Capric acid               |                |                | 1.0000         |                | 0.2711         | kg / FU     |
| Lauric acid               |                |                |                | 1.0000         | 0.3187         | kg / FU     |
| Mixed                     | 1.0000         | 1.0000         | 1.0000         | 1.0000         | 1.0000         | FU          |
| Sludge                    | 208.0401       | 176.7000       | 176.6829       | 177.1219       | 179.7406       | kg / FU     |
| NH <sub>3</sub>           | 0.0002         | 0.0002         | 0.0002         | 0.0002         | 0.0002         | kg / FU     |
| CO <sub>2</sub> emissions | 39.3399        | 33.4135        | 33.4103        | 33.4933        | 33.9885        | kg / FU     |

**Supplementary Table 8.** Life cycle assessment results of MCFAs production from fossil-based methanol.

| <b>Impact category</b>          | <b>Unit</b>            | <b>Case A1</b> | <b>Case A2</b> | <b>Case A3</b> | <b>Case A4</b> | <b>Case A5</b> |
|---------------------------------|------------------------|----------------|----------------|----------------|----------------|----------------|
| Agricultural land occupation    | m <sup>2</sup> *a      | 1.537          | 1.521          | 1.521          | 1.521          | 1.546          |
| Climate Change                  | kg CO <sub>2</sub> eq  | 130.589        | 129.298        | 129.285        | 129.284        | 132.189        |
| Fossil depletion                | kg oil eq              | 35.047         | 34.700         | 34.697         | 34.696         | 35.581         |
| Freshwater ecotoxicity          | kg 1,4-DB eq           | 2.101          | 2.080          | 2.080          | 2.080          | 2.119          |
| Freshwater eutrophication       | kg P eq                | 0.073          | 0.072          | 0.072          | 0.072          | 0.073          |
| Human toxicity                  | kg 1,4-DB eq           | 2.264          | 2.241          | 2.241          | 2.241          | 2.282          |
| Ionising radiation              | kg U <sub>235</sub> eq | 1.434          | 1.420          | 1.420          | 1.419          | 1.443          |
| Marine ecotoxicity              | kg 1,4-DB eq           | 1.362          | 1.349          | 1.348          | 1.348          | 1.373          |
| Marine eutrophication           | kg N eq                | 0.034          | 0.034          | 0.034          | 0.034          | 0.034          |
| Metal depletion                 | kg Fe eq               | 0.007          | 0.007          | 0.007          | 0.007          | 0.007          |
| Natural land transformation     | m <sup>2</sup>         | 0.006          | 0.006          | 0.006          | 0.006          | 0.006          |
| Ozone depletion                 | kg CFC-11 eq           | 0.000          | 0.000          | 0.000          | 0.000          | 0.000          |
| Particulate matter formation    | kg PM <sub>10</sub> eq | 0.162          | 0.161          | 0.161          | 0.161          | 0.164          |
| Photochemical oxidant formation | kg NMVOC               | 0.354          | 0.351          | 0.351          | 0.351          | 0.359          |
| Terrestrial acidification       | kg SO <sub>2</sub> eq  | 0.548          | 0.543          | 0.543          | 0.543          | 0.552          |
| Terrestrial ecotoxicity         | kg 1,4-DB eq           | 0.007          | 0.007          | 0.007          | 0.007          | 0.007          |
| Urban land occupation           | m <sup>2</sup> *a      | 1.500          | 1.486          | 1.485          | 1.485          | 1.511          |
| Water depletion                 | m <sup>3</sup>         | 54.544         | 54.004         | 53.998         | 53.998         | 55.024         |

**Supplementary Table 9.** Life cycle assessment results of MCFAs production from glucose.

| <b>Impact category</b>          | <b>Unit</b>            | <b>Case B1</b> | <b>Case B2</b> | <b>Case B3</b> | <b>Case B4</b> | <b>Case B5</b> |
|---------------------------------|------------------------|----------------|----------------|----------------|----------------|----------------|
| Agricultural land occupation    | m <sup>2</sup> *a      | 8.470          | 8.471          | 8.470          | 8.470          | 8.617          |
| Climate Change                  | kg CO <sub>2</sub> eq  | 28.875         | 28.878         | 28.875         | 28.875         | 29.374         |
| Fossil depletion                | kg oil eq              | 4.772          | 4.773          | 4.772          | 4.772          | 4.856          |
| Freshwater ecotoxicity          | kg 1,4-DB eq           | 1.067          | 1.067          | 1.067          | 1.067          | 1.085          |
| Freshwater eutrophication       | kg P eq                | 0.006          | 0.006          | 0.006          | 0.006          | 0.007          |
| Human toxicity                  | kg 1,4-DB eq           | 0.619          | 0.619          | 0.619          | 0.619          | 0.630          |
| Ionising radiation              | kg U <sub>235</sub> eq | 1.565          | 1.565          | 1.565          | 1.565          | 1.592          |
| Marine ecotoxicity              | kg 1,4-DB eq           | 0.448          | 0.448          | 0.448          | 0.448          | 0.455          |
| Marine eutrophication           | kg N eq                | 0.055          | 0.055          | 0.055          | 0.055          | 0.056          |
| Metal depletion                 | kg Fe eq               | 0.008          | 0.008          | 0.008          | 0.008          | 0.008          |
| Natural land transformation     | m <sup>2</sup>         | 0.003          | 0.003          | 0.003          | 0.003          | 0.003          |
| Ozone depletion                 | kg CFC-11 eq           | 0.000          | 0.000          | 0.000          | 0.000          | 0.000          |
| Particulate matter formation    | kg PM <sub>10</sub> eq | 0.044          | 0.044          | 0.044          | 0.044          | 0.045          |
| Photochemical oxidant formation | kg NMVOC               | 0.059          | 0.059          | 0.059          | 0.059          | 0.060          |
| Terrestrial acidification       | kg SO <sub>2</sub> eq  | 0.153          | 0.153          | 0.153          | 0.153          | 0.155          |
| Terrestrial ecotoxicity         | kg 1,4-DB eq           | 0.160          | 0.160          | 0.160          | 0.160          | 0.163          |
| Urban land occupation           | m <sup>2</sup> *a      | 0.242          | 0.242          | 0.242          | 0.242          | 0.246          |
| Water depletion                 | m <sup>3</sup>         | 64.252         | 64.259         | 64.253         | 64.252         | 65.363         |

**Supplementary Table 10.** Life cycle assessment results of MCFAs production from corncob residues.

| <b>Impact category</b>          | <b>Unit</b>            | <b>Case C1</b> | <b>Case C2</b> | <b>Case C3</b> | <b>Case C4</b> | <b>Case C5</b> |
|---------------------------------|------------------------|----------------|----------------|----------------|----------------|----------------|
| Agricultural land occupation    | m <sup>2</sup> *a      | 11.277         | 11.278         | 11.277         | 11.277         | 11.472         |
| Climate Change                  | kg CO <sub>2</sub> eq  | 38.726         | 38.731         | 38.728         | 38.726         | 39.396         |
| Fossil depletion                | kg oil eq              | 6.138          | 6.139          | 6.139          | 6.138          | 6.244          |
| Freshwater ecotoxicity          | kg 1,4-DB eq           | 0.959          | 0.959          | 0.959          | 0.959          | 0.975          |
| Freshwater eutrophication       | kg P eq                | 0.010          | 0.010          | 0.010          | 0.010          | 0.010          |
| Human toxicity                  | kg 1,4-DB eq           | 0.934          | 0.934          | 0.934          | 0.934          | 0.950          |
| Ionising radiation              | kg U <sub>235</sub> eq | 1.243          | 1.243          | 1.243          | 1.243          | 1.264          |
| Marine ecotoxicity              | kg 1,4-DB eq           | 0.383          | 0.383          | 0.383          | 0.383          | 0.389          |
| Marine eutrophication           | kg N eq                | 0.088          | 0.088          | 0.088          | 0.088          | 0.090          |
| Metal depletion                 | kg Fe eq               | 0.006          | 0.006          | 0.006          | 0.006          | 0.006          |
| Natural land transformation     | m <sup>2</sup>         | 0.005          | 0.005          | 0.005          | 0.005          | 0.005          |
| Ozone depletion                 | kg CFC-11 eq           | 0.000          | 0.000          | 0.000          | 0.000          | 0.000          |
| Particulate matter formation    | kg PM <sub>10</sub> eq | 0.067          | 0.067          | 0.067          | 0.067          | 0.068          |
| Photochemical oxidant formation | kg NMVOC               | 0.096          | 0.096          | 0.096          | 0.096          | 0.098          |
| Terrestrial acidification       | kg SO <sub>2</sub> eq  | 0.192          | 0.192          | 0.192          | 0.192          | 0.196          |
| Terrestrial ecotoxicity         | kg 1,4-DB eq           | 2.420          | 2.421          | 2.421          | 2.420          | 2.462          |
| Urban land occupation           | m <sup>2</sup> *a      | 0.337          | 0.337          | 0.337          | 0.337          | 0.343          |
| Water depletion                 | m <sup>3</sup>         | 86.705         | 86.717         | 86.711         | 86.705         | 88.207         |

**Supplementary Table 11.** Life cycle assessment results of MCFAs production from carbon dioxide.

| <b>Impact category</b>          | <b>Unit</b>            | <b>Case D1</b> | <b>Case D2</b> | <b>Case D3</b> | <b>Case D4</b> | <b>Case D5</b> |
|---------------------------------|------------------------|----------------|----------------|----------------|----------------|----------------|
| Agricultural land occupation    | m <sup>2</sup> *a      | 0.782          | 0.774          | 0.774          | 0.774          | 0.742          |
| Climate Change                  | kg CO <sub>2</sub> eq  | 24.209         | 23.970         | 22.155         | 23.966         | 23.632         |
| Fossil depletion                | kg oil eq              | 2.720          | 2.693          | 2.693          | 2.693          | 2.567          |
| Freshwater ecotoxicity          | kg 1,4-DB eq           | 0.668          | 0.662          | 0.662          | 0.662          | 0.609          |
| Freshwater eutrophication       | kg P eq                | 0.003          | 0.003          | 0.003          | 0.003          | 0.003          |
| Human toxicity                  | kg 1,4-DB eq           | 0.575          | 0.569          | 0.569          | 0.569          | 0.528          |
| Ionising radiation              | kg U <sub>235</sub> eq | 0.867          | 0.858          | 0.858          | 0.858          | 0.823          |
| Marine ecotoxicity              | kg 1,4-DB eq           | 0.303          | 0.300          | 0.300          | 0.300          | 0.276          |
| Marine eutrophication           | kg N eq                | 0.009          | 0.009          | 0.009          | 0.009          | 0.008          |
| Metal depletion                 | kg Fe eq               | 0.005          | 0.005          | 0.005          | 0.005          | 0.004          |
| Natural land transformation     | m <sup>2</sup>         | 0.002          | 0.002          | 0.002          | 0.002          | 0.002          |
| Ozone depletion                 | kg CFC-11 eq           | 0.000          | 0.000          | 0.000          | 0.000          | 0.000          |
| Particulate matter formation    | kg PM <sub>10</sub> eq | 0.023          | 0.022          | 0.022          | 0.022          | 0.021          |
| Photochemical oxidant formation | kg NMVOC               | 0.039          | 0.039          | 0.039          | 0.039          | 0.037          |
| Terrestrial acidification       | kg SO <sub>2</sub> eq  | 0.063          | 0.062          | 0.062          | 0.062          | 0.058          |
| Terrestrial ecotoxicity         | kg 1,4-DB eq           | 0.007          | 0.007          | 0.007          | 0.007          | 0.006          |
| Urban land occupation           | m <sup>2</sup> *a      | 1.088          | 1.078          | 1.077          | 1.077          | 0.929          |
| Water depletion                 | m <sup>3</sup>         | 57.371         | 56.804         | 56.799         | 56.797         | 50.909         |

**Supplementary Table 12.** Life cycle assessment results of mixed MCFAs production.

| <b>Impact category</b>          | <b>Unit</b>            | <b>Case E1</b> | <b>Case E2</b> | <b>Case E3</b> | <b>Case E4</b> | <b>Case E5</b> |
|---------------------------------|------------------------|----------------|----------------|----------------|----------------|----------------|
| Agricultural land occupation    | m <sup>2</sup> *a      | 271.558        | 230.649        | 230.627        | 231.200        | 234.618        |
| Climate Change                  | kg CO <sub>2</sub> eq  | 89.622         | 76.121         | 76.114         | 76.303         | 77.431         |
| Fossil depletion                | kg oil eq              | 10.752         | 9.132          | 9.131          | 9.154          | 9.289          |
| Freshwater ecotoxicity          | kg 1,4-DB eq           | 1.132          | 0.962          | 0.962          | 0.964          | 0.978          |
| Freshwater eutrophication       | kg P eq                | 0.019          | 0.016          | 0.016          | 0.016          | 0.016          |
| Human toxicity                  | kg 1,4-DB eq           | 1.490          | 1.266          | 1.266          | 1.269          | 1.288          |
| Ionising radiation              | kg U <sub>235</sub> eq | 2.923          | 2.483          | 2.483          | 2.489          | 2.526          |
| Marine ecotoxicity              | kg 1,4-DB eq           | 0.556          | 0.473          | 0.473          | 0.474          | 0.481          |
| Marine eutrophication           | kg N eq                | 0.035          | 0.030          | 0.030          | 0.030          | 0.030          |
| Metal depletion                 | kg Fe eq               | 0.015          | 0.013          | 0.013          | 0.013          | 0.013          |
| Natural land transformation     | m <sup>2</sup>         | 0.004          | 0.003          | 0.003          | 0.003          | 0.003          |
| Ozone depletion                 | kg CFC-11 eq           | 0.000          | 0.000          | 0.000          | 0.000          | 0.000          |
| Particulate matter formation    | kg PM <sub>10</sub> eq | 0.118          | 0.101          | 0.101          | 0.101          | 0.102          |
| Photochemical oxidant formation | kg NMVOC               | 0.244          | 0.207          | 0.207          | 0.208          | 0.211          |
| Terrestrial acidification       | kg SO <sub>2</sub> eq  | 0.224          | 0.191          | 0.191          | 0.191          | 0.194          |
| Terrestrial ecotoxicity         | kg 1,4-DB eq           | 0.069          | 0.058          | 0.058          | 0.059          | 0.059          |
| Urban land occupation           | m <sup>2</sup> *a      | 2.142          | 1.819          | 1.819          | 1.823          | 1.850          |
| Water depletion                 | m <sup>3</sup>         | 186.856        | 158.708        | 158.692        | 159.086        | 161.438        |

**Supplementary Table 13.** Raw material and utility costs and credit used in the base case.

| <b>Raw material and utility</b> | <b>Price (2025\$)</b> | <b>Reference</b> |
|---------------------------------|-----------------------|------------------|
| Methanol                        | \$370.00/ton          | a                |
| Glucose                         | \$471.93/ton          | b                |
| Corn cob residues               | \$314.22/ton          | c                |
| CO <sub>2</sub> from wastes     | \$20.2/ton            | 17               |
| Methane                         | \$139.7/ton           | d                |
| CTec3                           | \$2434.18/ton         | e                |
| Ammonia                         | \$566.40/ton          | 22               |
| Flocculant                      | \$12612.83/ton        | 22               |
| Makeup Water                    | \$0.55/ton            | 22               |
| Electricity                     | \$0.03/kWh            | 22               |
| Sludge disposal cost            | \$20.75/ton           | 22               |
| <b>Credit</b>                   | <b>Price (2025\$)</b> | <b>Reference</b> |
| Biofertilizer credit            | \$365.86/ton          | 23               |
| Carbon tax credit               | \$104.77/ton          | 24               |
| Caproic acid                    | \$5334.90/ton         | 25               |
| Caprylic acid                   | \$5840.62/ton         | 26               |
| Capric acid                     | \$2920.31/ton         | 26               |
| Lauric acid                     | \$1946.87/ton         | 26               |

a. <https://www.methanex.com/our-products/about-methanol/pricing/>

b. <https://dir.tridge.com/prices/glucose-syrup>

c. <https://nxhuiheng.en.made-in-china.com/product/ljFQYUuKCzhV/China-Abrasive-Crushed-Corn-COB-Corn-cob-with-Factory-Price.html>

d. <https://markets.businessinsider.com/commodities/natural-gas-price?>

e. <https://www.zauba.com/import-cellic-hs-code.html?>

**Supplementary Table 14.** Climate impacts of different electricity categories.

| <b>Electricity categories</b> | <b>Climate impacts</b> | <b>Unit</b>                     | <b>References</b> |
|-------------------------------|------------------------|---------------------------------|-------------------|
| Wind                          | 0.01                   | kg CO <sub>2</sub> -eq per kW h | 27                |
| Iceland                       | 0.028                  | kg CO <sub>2</sub> -eq per kW h | 28                |
| France                        | 0.044                  | kg CO <sub>2</sub> -eq per kW h | 28                |
| Global average 2050           | 0.081                  | kg CO <sub>2</sub> -eq per kW h | 27                |
| PV                            | 0.087                  | kg CO <sub>2</sub> -eq per kW h | Ecoinvent v3.6    |
| Switzerland                   | 0.166                  | kg CO <sub>2</sub> -eq per kW h | 27                |
| Canada                        | 0.175                  | kg CO <sub>2</sub> -eq per kW h | 28                |
| United Kingdom                | 0.211                  | kg CO <sub>2</sub> -eq per kW h | 28                |
| Global average 2030           | 0.277                  | kg CO <sub>2</sub> -eq per kW h | 27                |
| Germany                       | 0.344                  | kg CO <sub>2</sub> -eq per kW h | 28                |
| United states                 | 0.384                  | kg CO <sub>2</sub> -eq per kW h | 28                |
| South korea                   | 0.414                  | kg CO <sub>2</sub> -eq per kW h | 28                |
| Japan                         | 0.482                  | kg CO <sub>2</sub> -eq per kW h | 28                |
| Australia                     | 0.552                  | kg CO <sub>2</sub> -eq per kW h | 28                |
| China                         | 0.56                   | kg CO <sub>2</sub> -eq per kW h | 28                |
| Poland                        | 0.615                  | kg CO <sub>2</sub> -eq per kW h | 28                |
| India                         | 0.708                  | kg CO <sub>2</sub> -eq per kW h | 28                |
| Kazakhstan                    | 0.802                  | kg CO <sub>2</sub> -eq per kW h | 28                |

**Supplementary Table 15.** n<sup>th</sup>-plant assumptions required by techno-economic analysis.

| <b>Assumption</b>                     | <b>Parameters <sup>6</sup></b>   |
|---------------------------------------|----------------------------------|
| Cost year for analysis                | 2025                             |
| Equity for plant                      | 50%                              |
| Loan interest and terms               | 5% annually / 10 years           |
| General plant depreciation period     | 7 years                          |
| Bioreactors depreciation period       | 10 years                         |
| Construction period                   | 2.5 years                        |
| Start-up time                         | 0.5 years                        |
| Revenues during startup               | 50%                              |
| Variable costs during startup         | 75%                              |
| Fixed costs during startup            | 100%                             |
| Internal rate of return               | 10%                              |
| Income tax rate                       | 21%                              |
| Annual operating time                 | 330 day/year (7920 hours/year)   |
| Design years                          | 30 years                         |
| Inside battery limit (ISBL)           | A100, A200, A300                 |
| Warehouse                             | 4% of ISBL                       |
| Site development                      | 9% of ISBL                       |
| Additional piping                     | 4.5% of ISBL                     |
| Indirect costs                        | percentage of total direct costs |
| Prorateable expenses                  | 10%                              |
| Field expenses                        | 10%                              |
| Home office and construction fee      | 20%                              |
| Project contingency                   | 10%                              |
| Other costs (Start-Up, Permits, etc.) | 10%                              |
| Fixed operating costs                 | percentage of total direct costs |
| Employees                             | 13 positions                     |
| Labor burden                          | 60% of total salaries            |
| Maintenance                           | 2% of ISBL                       |

Insurance and taxes

0.5% of fixed capital investment

---

**Supplementary Table 16.** Capital expenses for the annual production of 3,000-ton MCFAs from fossil-based methanol. FCI: fixed capital investment, TDC: total direct cost, TIC: total indirect cost, WWT: wastewater treatment.

| Items                   | Classification Items      | Case A1 (MMS)      |              | Case A2 (MMS) |              | Case A3 (MMS) |              | Case A4 (MMS) |              | Case A5 (MMS) |              |       |
|-------------------------|---------------------------|--------------------|--------------|---------------|--------------|---------------|--------------|---------------|--------------|---------------|--------------|-------|
|                         |                           | Costs              | Total        | Costs         | Total        | Costs         | Total        | Costs         | Total        | Costs         | Total        |       |
|                         | Feedstock supply          | 0                  |              | 0             |              | 0             |              | 0             |              | 0             |              |       |
|                         | Equipment & installation  | MCFAs production   | 7.27         |               | 7.27         |               | 7.27         |               | 7.27         |               | 7.27         |       |
|                         |                           | MCFAs purification | 4.84         |               | 4.84         |               | 4.84         |               | 4.84         |               | 4.83         |       |
| TDC                     |                           | WWT                | 1.45         | 18.02         | 1.45         | 18.02         | 1.45         | 18.02         | 1.45         | 18.02         | 1.45         | 18.01 |
|                         |                           | Utilities          | 2.35         |               | 2.35         |               | 2.35         |               | 2.35         |               | 2.35         |       |
|                         | Warehouse                 | 0.48               |              | 0.48          |              | 0.48          |              | 0.48          |              | 0.48          |              |       |
| FCI                     | Site development          | 1.09               |              | 1.09          |              | 1.09          |              | 1.09          |              | 1.09          |              |       |
|                         | Additional piping         | 0.54               |              | 0.54          |              | 0.54          |              | 0.54          |              | 0.54          |              |       |
|                         | Prorated expenses         | 1.80               |              | 1.80          |              | 1.80          |              | 1.80          |              | 1.80          |              |       |
|                         | Field expenses            | 1.80               |              | 1.80          |              | 1.80          |              | 1.80          |              | 1.80          |              |       |
| TIC                     | Office & construction fee | 3.60               | 10.81        | 3.60          | 10.81        | 3.60          | 10.81        | 3.60          | 10.81        | 3.60          | 10.81        |       |
|                         | Project contingency       | 1.80               |              | 1.80          |              | 1.80          |              | 1.80          |              | 1.80          |              |       |
|                         | Other costs               | 1.80               |              | 1.80          |              | 1.80          |              | 1.80          |              | 1.80          |              |       |
| Land                    |                           | 0.29               | 0.29         | 0.29          | 0.29         | 0.29          | 0.29         | 0.29          | 0.29         | 0.29          | 0.29         |       |
| Working capital         |                           | 1.44               | 1.44         | 1.44          | 1.44         | 1.44          | 1.44         | 1.44          | 1.44         | 1.44          | 1.44         |       |
| <b>Capital expenses</b> |                           |                    | <b>30.56</b> |               | <b>30.56</b> |               | <b>30.56</b> |               | <b>30.56</b> |               | <b>30.55</b> |       |

**Supplementary Table 17.** Capital expenses for the annual production of 3,000-ton MCFAs from glucose. FCI: fixed capital investment, TDC: total direct cost, TIC: total indirect cost, WWT: wastewater treatment.

| Items                   | Classification Items      | Case B1 (MM\$)     |              | Case B2 (MM\$) |              | Case B3 (MM\$) |              | Case B4 (MM\$) |              | Case B5 (MM\$) |              |       |
|-------------------------|---------------------------|--------------------|--------------|----------------|--------------|----------------|--------------|----------------|--------------|----------------|--------------|-------|
|                         |                           | Costs              | Total        | Costs          | Total        | Costs          | Total        | Costs          | Total        | Costs          | Total        |       |
|                         | Feedstock supply          | 0                  |              | 0              |              | 0              |              | 0              |              | 0              |              |       |
|                         | Equipment & installation  | MCFAs production   | 5.79         | 5.79           | 5.79         | 5.79           | 5.79         | 5.79           | 5.79         | 5.79           | 5.79         |       |
|                         |                           | MCFAs purification | 3.75         |                | 3.75         |                | 3.75         |                | 3.82         |                | 3.82         |       |
| TDC                     |                           | WWT                | 0.67         | 13.34          | 0.67         | 13.34          | 0.67         | 13.34          | 0.67         | 13.43          | 0.67         | 13.43 |
|                         |                           | Utilities          | 1.46         |                | 1.46         |                | 1.46         |                | 1.46         |                | 1.46         |       |
|                         | Warehouse                 | 0.38               |              | 0.38           |              | 0.38           |              | 0.38           |              | 0.38           |              |       |
| FCI                     | Site development          | 0.86               |              | 0.86           |              | 0.86           |              | 0.87           |              | 0.87           |              |       |
|                         | Additional piping         | 0.43               |              | 0.43           |              | 0.43           |              | 0.43           |              | 0.43           |              |       |
|                         | Prorated expenses         | 1.33               |              | 1.33           |              | 1.33           |              | 1.34           |              | 1.34           |              |       |
|                         | Field expenses            | 1.33               |              | 1.33           |              | 1.33           |              | 1.34           |              | 1.34           |              |       |
| TIC                     | Office & construction fee | 2.67               | 8.01         | 2.67           | 8.01         | 2.67           | 8.01         | 2.69           | 8.06         | 2.69           | 8.06         |       |
|                         | Project contingency       | 1.33               |              | 1.33           |              | 1.33           |              | 1.34           |              | 1.34           |              |       |
|                         | Other costs               | 1.33               |              | 1.33           |              | 1.33           |              | 1.34           |              | 1.34           |              |       |
| Land                    |                           | 0.21               | 0.21         | 0.21           | 0.21         | 0.21           | 0.21         | 0.21           | 0.21         | 0.21           | 0.21         |       |
| Working capital         |                           | 1.07               | 1.07         | 1.07           | 1.07         | 1.07           | 1.07         | 1.07           | 1.07         | 1.07           | 1.07         |       |
| <b>Capital expenses</b> |                           |                    | <b>22.63</b> |                | <b>22.63</b> |                | <b>22.63</b> |                | <b>22.77</b> |                | <b>22.77</b> |       |

**Supplementary Table 18.** Capital expenses for the annual production of 3,000-ton MCFAs from corncob residues. FCI: fixed capital investment, TDC: total direct cost, TIC: total indirect cost, WWT: wastewater treatment.

| Items                   | Classification Items |                           | Case C1 (MM\$) |              | Case C2 (MM\$) |              | Case C3 (MM\$) |              | Case C4 (MM\$) |              | Case C5 (MM\$) |              |
|-------------------------|----------------------|---------------------------|----------------|--------------|----------------|--------------|----------------|--------------|----------------|--------------|----------------|--------------|
|                         |                      |                           | Costs          | Total        |
|                         |                      | Feedstock supply          | 0.12           |              | 0.12           |              | 0.12           |              | 0.12           |              | 0.12           |              |
|                         | TDC                  | Equipment & installation  | 6.69           |              | 6.69           |              | 6.69           |              | 6.69           |              | 6.69           |              |
|                         |                      | MCFAs production          | 5.01           |              | 5.01           |              | 5.01           |              | 5.01           |              | 4.99           |              |
|                         |                      | MCFAs purification        | 0.75           |              | 0.75           |              | 0.75           |              | 0.75           |              | 0.75           |              |
|                         |                      | WWT                       | 1.56           | 16.20        | 1.56           | 16.20        | 1.56           | 16.20        | 1.56           | 16.20        | 1.56           | 16.18        |
|                         |                      | Utilities                 | 0.47           |              | 0.47           |              | 0.47           |              | 0.47           |              | 0.47           |              |
|                         | Warehouse            | 1.06                      |                | 1.06         |                | 1.06         |                | 1.06         |                | 1.06         |                |              |
| FCI                     |                      | Site development          | 0.53           |              | 0.53           |              | 0.53           |              | 0.53           |              | 0.53           |              |
|                         |                      | Additional piping         | 1.62           |              | 1.62           |              | 1.62           |              | 1.62           |              | 1.62           |              |
|                         |                      | Prorated expenses         | 1.62           |              | 1.62           |              | 1.62           |              | 1.62           |              | 1.62           |              |
|                         |                      | Field expenses            | 1.62           |              | 1.62           |              | 1.62           |              | 1.62           |              | 1.62           |              |
|                         | TIC                  | Office & construction fee | 3.24           | 9.72         | 3.24           | 9.72         | 3.24           | 9.72         | 3.24           | 9.72         | 3.24           | 9.71         |
|                         |                      | Project contingency       | 1.62           |              | 1.62           |              | 1.62           |              | 1.62           |              | 1.62           |              |
|                         |                      | Other costs               | 1.62           |              | 1.62           |              | 1.62           |              | 1.62           |              | 1.62           |              |
| Land                    |                      |                           | 0.26           | 0.26         | 0.26           | 0.26         | 0.26           | 0.26         | 0.26           | 0.26         | 0.26           | 0.26         |
| Working capital         |                      |                           | 1.30           | 1.30         | 1.30           | 1.30         | 1.30           | 1.30         | 1.30           | 1.30         | 1.29           | 1.29         |
| <b>Capital expenses</b> |                      |                           |                | <b>27.47</b> |                | <b>27.47</b> |                | <b>27.47</b> |                | <b>27.47</b> |                | <b>27.44</b> |

**Supplementary Table 19.** Capital expenses for the annual production of 3,000-ton MCFAs from carbon dioxide. FCI: fixed capital investment, TDC: total direct cost, TIC: total indirect cost, WWT: wastewater treatment.

| Items                   | Classification Items |                           | Case D1 (MM\$) |              | Case D2 (MM\$) |              | Case D3 (MM\$) |              | Case D4 (MM\$) |              | Case D5 (MM\$) |              |
|-------------------------|----------------------|---------------------------|----------------|--------------|----------------|--------------|----------------|--------------|----------------|--------------|----------------|--------------|
|                         |                      |                           | Costs          | Total        |
|                         |                      | Feedstock supply          | 2.52           |              | 2.52           |              | 2.52           |              | 2.52           |              | 2.52           |              |
|                         | TDC                  | Equipment & installation  | 8.13           |              | 8.13           |              | 8.13           |              | 8.13           |              | 8.13           |              |
|                         |                      | MCFAs production          | 4.63           |              | 4.63           |              | 4.63           |              | 4.63           |              | 4.93           |              |
|                         |                      | MCFAs purification        | 1.52           |              | 1.52           |              | 1.52           |              | 1.52           |              | 1.53           |              |
|                         |                      | WWT                       | 1.79           | 21.26        | 1.79           | 21.26        | 1.79           | 21.26        | 1.79           | 21.26        | 1.79           | 21.62        |
|                         |                      | Utilities                 | 0.61           |              | 0.61           |              | 0.61           |              | 0.61           |              | 0.62           |              |
|                         | FCI                  | Warehouse                 | 1.37           |              | 1.37           |              | 1.37           |              | 1.37           |              | 1.40           |              |
|                         |                      | Site development          | 0.69           |              | 0.69           |              | 0.69           |              | 0.69           |              | 0.70           |              |
|                         |                      | Additional piping         | 2.13           |              | 2.13           |              | 2.13           |              | 2.13           |              | 2.16           |              |
|                         | TIC                  | Prorated expenses         | 2.13           |              | 2.13           |              | 2.13           |              | 2.13           |              | 2.16           |              |
|                         |                      | Field expenses            | 2.13           |              | 2.13           |              | 2.13           |              | 2.13           |              | 2.16           |              |
|                         |                      | Office & construction fee | 4.25           | 12.75        | 4.25           | 12.75        | 4.25           | 12.75        | 4.25           | 12.75        | 4.32           | 12.97        |
|                         |                      | Project contingency       | 2.13           |              | 2.13           |              | 2.13           |              | 2.13           |              | 2.16           |              |
|                         |                      | Other costs               | 2.13           |              | 2.13           |              | 2.13           |              | 2.13           |              | 2.16           |              |
| Land                    |                      |                           | 0.34           | 0.34         | 0.34           | 0.34         | 0.34           | 0.34         | 0.34           | 0.34         | 0.35           | 0.35         |
| Working capital         |                      |                           | 1.70           | 1.70         | 1.70           | 1.70         | 1.70           | 1.70         | 1.70           | 1.70         | 1.73           | 1.73         |
| <b>Capital expenses</b> |                      |                           | <b>36.05</b>   | <b>36.05</b> | <b>36.05</b>   | <b>36.05</b> | <b>36.05</b>   | <b>36.05</b> | <b>36.05</b>   | <b>36.05</b> | <b>36.67</b>   | <b>36.67</b> |

**Supplementary Table 20.** Capital expenses for the annual production of 3,000-ton MCFAs from methane. FCI: fixed capital investment, TDC: total direct cost, TIC: total indirect cost, WWT: wastewater treatment.

| Items                   | Classification Items      | Case E1 (MMS)      |              | Case E2 (MMS) |              | Case E3 (MMS) |              | Case E4 (MMS) |              | Case E5 (MMS) |              |
|-------------------------|---------------------------|--------------------|--------------|---------------|--------------|---------------|--------------|---------------|--------------|---------------|--------------|
|                         |                           | Costs              | Total        | Costs         | Total        | Costs         | Total        | Costs         | Total        | Costs         | Total        |
|                         | Feedstock supply          | 0                  |              | 0             |              | 0             |              | 0             |              | 0             |              |
|                         | Equipment & installation  | MCFAs production   | 7.95         | 7.95          | 7.95         | 7.95          | 7.95         | 7.95          | 7.95         | 7.95          | 7.95         |
|                         |                           | MCFAs purification | 4.85         |               | 4.85         |               | 4.85         |               | 4.85         |               | 4.99         |
|                         |                           | WWT                | 0.90         |               | 0.90         |               | 0.90         |               | 0.90         |               | 0.90         |
| TDC                     |                           | Utilities          | 6.08         | 22.02         | 6.08         | 22.02         | 6.08         | 22.02         | 6.08         | 22.02         | 6.08         |
|                         | Warehouse                 | 0.51               |              | 0.51          |              | 0.51          |              | 0.51          |              | 0.52          |              |
| FCI                     | Site development          | 1.15               |              | 1.15          |              | 1.15          |              | 1.15          |              | 1.16          |              |
|                         | Additional piping         | 0.58               |              | 0.58          |              | 0.58          |              | 0.58          |              | 0.58          |              |
|                         | Prorated expenses         | 2.20               |              | 2.20          |              | 2.20          |              | 2.20          |              | 2.20          |              |
|                         | Field expenses            | 2.20               |              | 2.20          |              | 2.20          |              | 2.20          |              | 2.20          |              |
| TIC                     | Office & construction fee | 4.40               | 13.21        | 4.40          | 13.21        | 4.40          | 13.21        | 4.40          | 13.21        | 4.40          | 13.31        |
|                         | Project contingency       | 2.20               |              | 2.20          |              | 2.20          |              | 2.20          |              | 2.20          |              |
|                         | Other costs               | 2.20               |              | 2.20          |              | 2.20          |              | 2.20          |              | 2.20          |              |
| Land                    |                           | 0.35               | 0.35         | 0.35          | 0.35         | 0.35          | 0.35         | 0.35          | 0.35         | 0.35          | 0.35         |
| Working capital         |                           | 1.76               | 1.76         | 1.76          | 1.76         | 1.76          | 1.76         | 1.76          | 1.76         | 1.77          | 1.77         |
| <b>Capital expenses</b> |                           |                    | <b>37.34</b> |               | <b>37.34</b> |               | <b>37.34</b> |               | <b>37.34</b> |               | <b>37.62</b> |

**Supplementary Table 21.** Operating expenses for the annual production of 3,000-ton MCFAs from fossil-based methanol.

| Items                      | Case A1           | Case A2           | Case A3           | Case A4           | Case A5           |
|----------------------------|-------------------|-------------------|-------------------|-------------------|-------------------|
|                            | MMS\$/year (2025) |
| Methanol                   | 25.49             | 25.49             | 25.49             | 25.49             | 25.49             |
| Water                      | 0.28              | 0.28              | 0.28              | 0.28              | 0.28              |
| Ammonia                    | 2.32              | 2.32              | 2.32              | 2.32              | 2.32              |
| Flocculant                 | 0.28              | 0.28              | 0.28              | 0.28              | 0.28              |
| Electricity                | 0.37              | 0.37              | 0.37              | 0.37              | 0.46              |
| Sludge disposal cost       | 0.44              | 0.44              | 0.44              | 0.44              | 0.39              |
| Sludge nitrogen credit     | 1.53              | 1.53              | 1.53              | 1.53              | 1.53              |
| Total salaries             | 1.21              | 1.21              | 1.21              | 1.21              | 1.21              |
| Labor burden               | 0.73              | 0.73              | 0.73              | 0.73              | 0.73              |
| Maintenance                | 0.24              | 0.24              | 0.24              | 0.24              | 0.24              |
| Property insurance and tax | 0.14              | 0.14              | 0.14              | 0.14              | 0.14              |
| <b>Operating expenses</b>  | <b>29.97</b>      | <b>29.97</b>      | <b>29.97</b>      | <b>29.97</b>      | <b>30.01</b>      |

**Supplementary Table 22.** Operating expenses for the annual production of 3,000-ton MCFAs from glucose.

| Items                      | Case B1           | Case B2           | Case B3           | Case B4           | Case B5           |
|----------------------------|-------------------|-------------------|-------------------|-------------------|-------------------|
|                            | MMS\$/year (2025) |
| Glucose                    | 15.44             | 15.44             | 15.44             | 15.44             | 15.44             |
| Water                      | 0.20              | 0.20              | 0.20              | 0.20              | 0.20              |
| Ammonia                    | 1.68              | 1.68              | 1.68              | 1.68              | 1.68              |
| Flocculant                 | 0.20              | 0.20              | 0.20              | 0.20              | 0.20              |
| Electricity                | 0.11              | 0.11              | 0.11              | 0.11              | 0.11              |
| Sludge disposal cost       | 0.04              | 0.04              | 0.04              | 0.26              | 0.26              |
| Sludge nitrogen credit     | 1.52              | 1.52              | 1.52              | 1.52              | 1.52              |
| Total salaries             | 1.21              | 1.21              | 1.21              | 1.21              | 1.21              |
| Labor burden               | 0.73              | 0.73              | 0.73              | 0.73              | 0.73              |
| Maintenance                | 0.19              | 0.19              | 0.19              | 0.17              | 0.19              |
| Property insurance and tax | 0.11              | 0.11              | 0.11              | 0.09              | 0.11              |
| <b>Operating expenses</b>  | <b>18.38</b>      | <b>18.38</b>      | <b>18.38</b>      | <b>18.58</b>      | <b>18.61</b>      |

**Supplementary Table 23.** Operating expenses for the annual production of 3,000-ton MCFAs from corncob residues.

| Items                      | Case C1           | Case C2           | Case C3           | Case C4           | Case C5           |
|----------------------------|-------------------|-------------------|-------------------|-------------------|-------------------|
|                            | MMS\$/year (2025) |
| Corncob residues           | 14.32             | 14.32             | 14.32             | 14.32             | 14.32             |
| CTec3 enzyme               | 4.51              | 4.51              | 4.51              | 4.51              | 4.51              |
| Water                      | 0.24              | 0.24              | 0.24              | 0.24              | 0.24              |
| Ammonia                    | 2.00              | 2.00              | 2.00              | 2.00              | 2.00              |
| Flocculant                 | 0.24              | 0.24              | 0.24              | 0.24              | 0.24              |
| Electricity                | 0.06              | 0.06              | 0.06              | 0.06              | 0.06              |
| Sludge disposal cost       | 0.37              | 0.37              | 0.37              | 0.37              | 0.40              |
| Sludge nitrogen credit     | 0.96              | 0.96              | 0.96              | 0.96              | 0.96              |
| Total salaries             | 1.21              | 1.21              | 1.21              | 1.21              | 1.21              |
| Labor burden               | 0.73              | 0.73              | 0.73              | 0.73              | 0.73              |
| Maintenance                | 0.24              | 0.24              | 0.24              | 0.24              | 0.22              |
| Property insurance and tax | 0.13              | 0.13              | 0.13              | 0.13              | 0.12              |
| <b>Operating expenses</b>  | <b>23.09</b>      | <b>23.09</b>      | <b>23.09</b>      | <b>23.09</b>      | <b>23.10</b>      |

**Supplementary Table 24.** Operating expenses for the annual production of 3,000-ton MCFAs from carbon dioxide.

| <b>Items</b>               | <b>Case D1</b>           | <b>Case D2</b>           | <b>Case D3</b>           | <b>Case D4</b>           | <b>Case D5</b>           |
|----------------------------|--------------------------|--------------------------|--------------------------|--------------------------|--------------------------|
|                            | <b>MMS\$/year (2025)</b> |
| Carbon dioxide             | 3.37                     | 3.37                     | 3.37                     | 3.37                     | 3.37                     |
| Water                      | 0.38                     | 0.38                     | 0.38                     | 0.38                     | 0.38                     |
| Ammonia                    | 2.39                     | 2.39                     | 2.39                     | 2.39                     | 2.39                     |
| Flocculant                 | 0.29                     | 0.29                     | 0.29                     | 0.29                     | 0.29                     |
| Electricity                | 3.03                     | 3.03                     | 3.03                     | 3.03                     | 3.03                     |
| Sludge disposal cost       | 0.40                     | 0.40                     | 0.40                     | 0.40                     | 0.40                     |
| Sludge nitrogen credit     | 1.51                     | 1.51                     | 1.51                     | 1.51                     | 1.51                     |
| Total salaries             | 1.21                     | 1.21                     | 1.21                     | 1.21                     | 1.21                     |
| Labor burden               | 0.73                     | 0.73                     | 0.73                     | 0.73                     | 0.73                     |
| Maintenance                | 0.31                     | 0.31                     | 0.31                     | 0.31                     | 0.31                     |
| Property insurance and tax | 0.17                     | 0.17                     | 0.17                     | 0.17                     | 0.17                     |
| <b>Operating expenses</b>  | <b>10.77</b>             | <b>10.77</b>             | <b>10.77</b>             | <b>10.77</b>             | <b>10.78</b>             |

**Supplementary Table 25.** Operating expenses for the annual production of 3,000-ton MCFAs from methane.

| Items                      | Case E1           | Case E2           | Case E3           | Case E4           | Case E5           |
|----------------------------|-------------------|-------------------|-------------------|-------------------|-------------------|
|                            | MMS\$/year (2025) |
| Methane                    | 6.86              | 6.86              | 6.86              | 6.86              | 6.86              |
| Water                      | 0.30              | 0.30              | 0.30              | 0.30              | 0.30              |
| Ammonia                    | 2.44              | 2.44              | 2.44              | 2.44              | 2.44              |
| Flocculant                 | 0.29              | 0.29              | 0.29              | 0.29              | 0.29              |
| Electricity                | 0.00              | 0.00              | 0.00              | 0.00              | 0.00              |
| Sludge disposal cost       | 0.46              | 0.46              | 0.46              | 0.46              | 0.48              |
| Sludge nitrogen credit     | 0.74              | 0.74              | 0.74              | 0.74              | 0.74              |
| Total salaries             | 1.21              | 1.21              | 1.21              | 1.21              | 1.21              |
| Labor burden               | 0.73              | 0.73              | 0.73              | 0.73              | 0.73              |
| Maintenance                | 0.26              | 0.26              | 0.26              | 0.26              | 0.26              |
| Property insurance and tax | 0.18              | 0.18              | 0.18              | 0.18              | 0.18              |
| <b>Operating expenses</b>  | <b>11.98</b>      | <b>11.98</b>      | <b>11.98</b>      | <b>11.98</b>      | <b>12.01</b>      |

**Supplementary Table 26.** Cost breakdown for the annual production of 3,000-ton MCFAs from fossil-based methanol.

| <b>Case studies</b> | <b>Capital recovery charge</b> | <b>Raw materials</b> | <b>Process electricity</b> | <b>Coproduct credit</b> | <b>Fixed costs</b> | <b>Area totals</b> |
|---------------------|--------------------------------|----------------------|----------------------------|-------------------------|--------------------|--------------------|
| A1                  | 1.143                          | 9.779                | 0.125                      | -0.520                  | 1.199              | 11.726             |
| A2                  | 1.134                          | 9.683                | 0.124                      | -0.515                  | 1.187              | 11.612             |
| A3                  | 1.134                          | 9.682                | 0.124                      | -0.515                  | 1.187              | 11.611             |
| A4                  | 1.134                          | 9.682                | 0.124                      | -0.515                  | 1.187              | 11.611             |
| A5                  | 1.084                          | 9.833                | 0.159                      | -0.524                  | 1.204              | 11.756             |

**Supplementary Table 27.** Cost breakdown for the annual production of 3,000-ton MCFAs from glucose.

| <b>Case studies</b> | <b>Capital recovery charge</b> | <b>Raw materials</b> | <b>Process electricity</b> | <b>Coproduct credit</b> | <b>Fixed costs</b> | <b>Area totals</b> |
|---------------------|--------------------------------|----------------------|----------------------------|-------------------------|--------------------|--------------------|
| B1                  | 0.812                          | 5.806                | 0.035                      | -0.503                  | 1.139              | 7.289              |
| B2                  | 0.813                          | 5.807                | 0.035                      | -0.503                  | 1.139              | 7.290              |
| B3                  | 0.812                          | 5.807                | 0.035                      | -0.503                  | 1.139              | 7.289              |
| B4                  | 0.812                          | 5.806                | 0.035                      | -0.503                  | 1.139              | 7.289              |
| B5                  | 0.830                          | 5.983                | 0.036                      | -0.512                  | 1.159              | 7.496              |

**Supplementary Table 28.** Cost breakdown for the annual production of 3,000-ton MCFAs from corncob residues.

| <b>Case studies</b> | <b>Capital recovery charge</b> | <b>Raw materials</b> | <b>Process electricity</b> | <b>Coproduct credit</b> | <b>Fixed costs</b> | <b>Area totals</b> |
|---------------------|--------------------------------|----------------------|----------------------------|-------------------------|--------------------|--------------------|
| C1                  | 2.376                          | 7.214                | 0.021                      | -0.320                  | 1.168              | 10.461             |
| C2                  | 2.377                          | 7.215                | 0.021                      | -0.320                  | 1.169              | 10.462             |
| C3                  | 2.376                          | 7.215                | 0.021                      | -0.320                  | 1.168              | 10.461             |
| C4                  | 2.376                          | 7.214                | 0.021                      | -0.320                  | 1.168              | 10.461             |
| C5                  | 2.369                          | 7.349                | 0.022                      | -0.325                  | 1.183              | 10.597             |

**Supplementary Table 29.** Cost breakdown for the annual production of 3,000-ton MCFAs from carbon dioxide.

| <b>Case studies</b> | <b>Capital recovery charge</b> | <b>Raw materials</b> | <b>Process electricity</b> | <b>Coproduct credit</b> | <b>Fixed costs</b> | <b>Area totals</b> |
|---------------------|--------------------------------|----------------------|----------------------------|-------------------------|--------------------|--------------------|
| D1                  | 1.324                          | 2.244                | 0.996                      | -0.494                  | 1.190              | 5.259              |
| D2                  | 1.312                          | 2.221                | 0.986                      | -0.489                  | 1.178              | 5.208              |
| D3                  | 1.312                          | 2.221                | 0.986                      | -0.489                  | 1.178              | 5.208              |
| D4                  | 1.312                          | 2.221                | 0.986                      | -0.489                  | 1.178              | 5.208              |
| D5                  | 1.316                          | 2.187                | 0.971                      | -0.482                  | 1.162              | 5.154              |

**Supplementary Table 30.** Cost breakdown for the annual production of 3,000-ton MCFAs from methane.

| <b>Case studies</b> | <b>Capital recovery charge</b> | <b>Raw materials</b> | <b>Process electricity</b> | <b>Coproduct credit</b> | <b>Fixed costs</b> | <b>Area totals</b> |
|---------------------|--------------------------------|----------------------|----------------------------|-------------------------|--------------------|--------------------|
| E1                  | 1.213                          | 3.475                | 0.000                      | -0.247                  | 1.201              | 5.642              |
| E2                  | 1.214                          | 3.475                | 0.000                      | -0.247                  | 1.201              | 5.643              |
| E3                  | 1.214                          | 3.475                | 0.000                      | -0.247                  | 1.201              | 5.643              |
| E4                  | 1.216                          | 3.484                | 0.000                      | -0.248                  | 1.204              | 5.656              |
| E5                  | 1.244                          | 3.542                | 0.000                      | -0.252                  | 1.224              | 5.758              |

**Supplementary Table 31.** Net income profiles of caproic acid production pathways during the plant's lifespan.

| <b>Year</b> | <b>Case A1</b> | <b>Case B1</b> | <b>Case C1</b> | <b>Case D1</b> | <b>Case E1</b> |
|-------------|----------------|----------------|----------------|----------------|----------------|
| 1           | -2.883         | -2.199         | -2.606         | -3.606         | -3.351         |
| 2           | -4.159         | -3.071         | -3.736         | -4.881         | -5.104         |
| 3           | -2.081         | -1.532         | -1.868         | -2.430         | -2.564         |
| 4           | -0.576         | -0.418         | -0.516         | -0.655         | -0.726         |
| 5           | 0.516          | 0.391          | 0.466          | 0.634          | 0.610          |
| 6           | 0.589          | 0.445          | 0.532          | 0.720          | 0.698          |
| 7           | 0.659          | 0.497          | 0.595          | 0.802          | 0.784          |
| 8           | 2.024          | 1.508          | 1.822          | 2.413          | 2.453          |
| 9           | 3.391          | 2.520          | 3.050          | 4.025          | 4.123          |
| 10          | 3.475          | 2.583          | 3.126          | 4.125          | 4.226          |
| 11          | 3.564          | 2.649          | 3.206          | 4.230          | 4.335          |
| 12          | 3.564          | 2.649          | 3.206          | 4.230          | 4.335          |
| 13          | 3.564          | 2.649          | 3.206          | 4.230          | 4.335          |
| 14          | 3.564          | 2.649          | 3.206          | 4.230          | 4.335          |
| 15          | 3.564          | 2.649          | 3.206          | 4.230          | 4.335          |
| 16          | 3.564          | 2.649          | 3.206          | 4.230          | 4.335          |
| 17          | 3.564          | 2.649          | 3.206          | 4.230          | 4.335          |
| 18          | 3.564          | 2.649          | 3.206          | 4.230          | 4.335          |
| 19          | 3.564          | 2.649          | 3.206          | 4.230          | 4.335          |
| 20          | 3.564          | 2.649          | 3.206          | 4.230          | 4.335          |
| 21          | 3.564          | 2.649          | 3.206          | 4.230          | 4.335          |
| 22          | 3.564          | 2.649          | 3.206          | 4.230          | 4.335          |
| 23          | 3.564          | 2.649          | 3.206          | 4.230          | 4.335          |
| 24          | 3.564          | 2.649          | 3.206          | 4.230          | 4.335          |
| 25          | 3.564          | 2.649          | 3.206          | 4.230          | 4.335          |
| 26          | 3.564          | 2.649          | 3.206          | 4.230          | 4.335          |
| 27          | 3.564          | 2.649          | 3.206          | 4.230          | 4.335          |
| 28          | 3.564          | 2.649          | 3.206          | 4.230          | 4.335          |
| 29          | 3.564          | 2.649          | 3.206          | 4.230          | 4.335          |
| 30          | 3.564          | 2.649          | 3.206          | 4.230          | 4.335          |

**Supplementary Table 32.** Net income profiles of caprylic acid production pathways during the plant's lifespan.

| <b>Year</b> | <b>Case A2</b> | <b>Case B2</b> | <b>Case C2</b> | <b>Case D2</b> | <b>Case E2</b> |
|-------------|----------------|----------------|----------------|----------------|----------------|
| 1           | -2.883         | -2.199         | -2.606         | -3.607         | -3.350         |
| 2           | -4.159         | -3.071         | -3.737         | -4.884         | -5.103         |
| 3           | -2.081         | -1.532         | -1.868         | -2.432         | -2.563         |
| 4           | -0.576         | -0.417         | -0.516         | -0.657         | -0.725         |
| 5           | 0.517          | 0.392          | 0.466          | 0.632          | 0.611          |
| 6           | 0.589          | 0.446          | 0.531          | 0.718          | 0.699          |
| 7           | 0.659          | 0.498          | 0.595          | 0.800          | 0.785          |
| 8           | 2.025          | 1.509          | 1.822          | 2.411          | 2.454          |
| 9           | 3.391          | 2.521          | 3.050          | 4.023          | 4.124          |
| 10          | 3.476          | 2.583          | 3.126          | 4.123          | 4.227          |
| 11          | 3.565          | 2.649          | 3.206          | 4.228          | 4.336          |
| 12          | 3.565          | 2.649          | 3.206          | 4.228          | 4.336          |
| 13          | 3.565          | 2.649          | 3.206          | 4.228          | 4.336          |
| 14          | 3.565          | 2.649          | 3.206          | 4.228          | 4.336          |
| 15          | 3.565          | 2.649          | 3.206          | 4.228          | 4.336          |
| 16          | 3.565          | 2.649          | 3.206          | 4.228          | 4.336          |
| 17          | 3.565          | 2.649          | 3.206          | 4.228          | 4.336          |
| 18          | 3.565          | 2.649          | 3.206          | 4.228          | 4.336          |
| 19          | 3.565          | 2.649          | 3.206          | 4.228          | 4.336          |
| 20          | 3.565          | 2.649          | 3.206          | 4.228          | 4.336          |
| 21          | 3.565          | 2.649          | 3.206          | 4.228          | 4.336          |
| 22          | 3.565          | 2.649          | 3.206          | 4.228          | 4.336          |
| 23          | 3.565          | 2.649          | 3.206          | 4.228          | 4.336          |
| 24          | 3.565          | 2.649          | 3.206          | 4.228          | 4.336          |
| 25          | 3.565          | 2.649          | 3.206          | 4.228          | 4.336          |
| 26          | 3.565          | 2.649          | 3.206          | 4.228          | 4.336          |
| 27          | 3.565          | 2.649          | 3.206          | 4.228          | 4.336          |
| 28          | 3.565          | 2.649          | 3.206          | 4.228          | 4.336          |
| 29          | 3.565          | 2.649          | 3.206          | 4.228          | 4.336          |
| 30          | 3.565          | 2.649          | 3.206          | 4.228          | 4.336          |

**Supplementary Table 33.** Net income profiles of capric acid production pathways during the plant's lifespan.

| <b>Year</b> | <b>Case A3</b> | <b>Case B3</b> | <b>Case C3</b> | <b>Case D3</b> | <b>Case E3</b> |
|-------------|----------------|----------------|----------------|----------------|----------------|
| 1           | -2.883         | -2.200         | -2.606         | -3.606         | -3.349         |
| 2           | -4.159         | -3.072         | -3.737         | -4.882         | -5.101         |
| 3           | -2.081         | -1.533         | -1.869         | -2.430         | -2.562         |
| 4           | -0.576         | -0.418         | -0.516         | -0.656         | -0.723         |
| 5           | 0.517          | 0.391          | 0.466          | 0.633          | 0.612          |
| 6           | 0.589          | 0.445          | 0.531          | 0.719          | 0.701          |
| 7           | 0.660          | 0.497          | 0.594          | 0.802          | 0.787          |
| 8           | 2.025          | 1.508          | 1.821          | 2.413          | 2.455          |
| 9           | 3.392          | 2.520          | 3.050          | 4.025          | 4.125          |
| 10          | 3.476          | 2.582          | 3.126          | 4.124          | 4.229          |
| 11          | 3.565          | 2.648          | 3.206          | 4.229          | 4.337          |
| 12          | 3.565          | 2.648          | 3.206          | 4.229          | 4.337          |
| 13          | 3.565          | 2.648          | 3.206          | 4.229          | 4.337          |
| 14          | 3.565          | 2.648          | 3.206          | 4.229          | 4.337          |
| 15          | 3.565          | 2.648          | 3.206          | 4.229          | 4.337          |
| 16          | 3.565          | 2.648          | 3.206          | 4.229          | 4.337          |
| 17          | 3.565          | 2.648          | 3.206          | 4.229          | 4.337          |
| 18          | 3.565          | 2.648          | 3.206          | 4.229          | 4.337          |
| 19          | 3.565          | 2.648          | 3.206          | 4.229          | 4.337          |
| 20          | 3.565          | 2.648          | 3.206          | 4.229          | 4.337          |
| 21          | 3.565          | 2.648          | 3.206          | 4.229          | 4.337          |
| 22          | 3.565          | 2.648          | 3.206          | 4.229          | 4.337          |
| 23          | 3.565          | 2.648          | 3.206          | 4.229          | 4.337          |
| 24          | 3.565          | 2.648          | 3.206          | 4.229          | 4.337          |
| 25          | 3.565          | 2.648          | 3.206          | 4.229          | 4.337          |
| 26          | 3.565          | 2.648          | 3.206          | 4.229          | 4.337          |
| 27          | 3.565          | 2.648          | 3.206          | 4.229          | 4.337          |
| 28          | 3.565          | 2.648          | 3.206          | 4.229          | 4.337          |
| 29          | 3.565          | 2.648          | 3.206          | 4.229          | 4.337          |
| 30          | 3.565          | 2.648          | 3.206          | 4.229          | 4.337          |

**Supplementary Table 34.** Net income profiles of lauric acid production pathways during the plant's lifespan.

| <b>Year</b> | <b>Case A4</b> | <b>Case B4</b> | <b>Case C4</b> | <b>Case D4</b> | <b>Case E4</b> |
|-------------|----------------|----------------|----------------|----------------|----------------|
| 1           | -2.883         | -2.200         | -2.606         | -3.606         | -3.655         |
| 2           | -4.158         | -3.071         | -3.737         | -4.882         | -4.969         |
| 3           | -2.080         | -1.532         | -1.869         | -2.430         | -2.476         |
| 4           | -0.575         | -0.418         | -0.516         | -0.655         | -0.670         |
| 5           | 0.517          | 0.391          | 0.466          | 0.634          | 0.641          |
| 6           | 0.590          | 0.445          | 0.531          | 0.719          | 0.728          |
| 7           | 0.660          | 0.497          | 0.594          | 0.802          | 0.812          |
| 8           | 2.026          | 1.508          | 1.822          | 2.413          | 2.450          |
| 9           | 3.392          | 2.520          | 3.050          | 4.025          | 4.090          |
| 10          | 3.477          | 2.583          | 3.126          | 4.125          | 4.191          |
| 11          | 3.566          | 2.648          | 3.206          | 4.230          | 4.298          |
| 12          | 3.566          | 2.648          | 3.206          | 4.230          | 4.298          |
| 13          | 3.566          | 2.648          | 3.206          | 4.230          | 4.298          |
| 14          | 3.566          | 2.648          | 3.206          | 4.230          | 4.298          |
| 15          | 3.566          | 2.648          | 3.206          | 4.230          | 4.298          |
| 16          | 3.566          | 2.648          | 3.206          | 4.230          | 4.298          |
| 17          | 3.566          | 2.648          | 3.206          | 4.230          | 4.298          |
| 18          | 3.566          | 2.648          | 3.206          | 4.230          | 4.298          |
| 19          | 3.566          | 2.648          | 3.206          | 4.230          | 4.298          |
| 20          | 3.566          | 2.648          | 3.206          | 4.230          | 4.298          |
| 21          | 3.566          | 2.648          | 3.206          | 4.230          | 4.298          |
| 22          | 3.566          | 2.648          | 3.206          | 4.230          | 4.298          |
| 23          | 3.566          | 2.648          | 3.206          | 4.230          | 4.298          |
| 24          | 3.566          | 2.648          | 3.206          | 4.230          | 4.298          |
| 25          | 3.566          | 2.648          | 3.206          | 4.230          | 4.298          |
| 26          | 3.566          | 2.648          | 3.206          | 4.230          | 4.298          |
| 27          | 3.566          | 2.648          | 3.206          | 4.230          | 4.298          |
| 28          | 3.566          | 2.648          | 3.206          | 4.230          | 4.298          |
| 29          | 3.566          | 2.648          | 3.206          | 4.230          | 4.298          |
| 30          | 3.566          | 2.648          | 3.206          | 4.230          | 4.298          |

**Supplementary Table 35.** Net income profiles of mixed MCFAs production pathways during the plant’s lifespan.

| <b>Year</b> | <b>Case A5</b> | <b>Case B5</b> | <b>Case C5</b> | <b>Case D5</b> | <b>Case E5</b> |
|-------------|----------------|----------------|----------------|----------------|----------------|
| 1           | -2.764         | -2.236         | -2.515         | -3.655         | -3.373         |
| 2           | -3.926         | -3.088         | -3.566         | -4.969         | -5.140         |
| 3           | -1.962         | -1.539         | -1.781         | -2.476         | -2.581         |
| 4           | -0.541         | -0.418         | -0.489         | -0.670         | -0.729         |
| 5           | 0.492          | 0.397          | 0.449          | 0.641          | 0.616          |
| 6           | 0.560          | 0.451          | 0.512          | 0.728          | 0.705          |
| 7           | 0.627          | 0.503          | 0.572          | 0.812          | 0.792          |
| 8           | 1.917          | 1.521          | 1.745          | 2.450          | 2.473          |
| 9           | 3.208          | 2.539          | 2.918          | 4.090          | 4.155          |
| 10          | 3.288          | 2.602          | 2.991          | 4.191          | 4.259          |
| 11          | 3.372          | 2.668          | 3.067          | 4.298          | 4.369          |
| 12          | 3.372          | 2.668          | 3.067          | 4.298          | 4.369          |
| 13          | 3.372          | 2.668          | 3.067          | 4.298          | 4.369          |
| 14          | 3.372          | 2.668          | 3.067          | 4.298          | 4.369          |
| 15          | 3.372          | 2.668          | 3.067          | 4.298          | 4.369          |
| 16          | 3.372          | 2.668          | 3.067          | 4.298          | 4.369          |
| 17          | 3.372          | 2.668          | 3.067          | 4.298          | 4.369          |
| 18          | 3.372          | 2.668          | 3.067          | 4.298          | 4.369          |
| 19          | 3.372          | 2.668          | 3.067          | 4.298          | 4.369          |
| 20          | 3.372          | 2.668          | 3.067          | 4.298          | 4.369          |
| 21          | 3.372          | 2.668          | 3.067          | 4.298          | 4.369          |
| 22          | 3.372          | 2.668          | 3.067          | 4.298          | 4.369          |
| 23          | 3.372          | 2.668          | 3.067          | 4.298          | 4.369          |
| 24          | 3.372          | 2.668          | 3.067          | 4.298          | 4.369          |
| 25          | 3.372          | 2.668          | 3.067          | 4.298          | 4.369          |
| 26          | 3.372          | 2.668          | 3.067          | 4.298          | 4.369          |
| 27          | 3.372          | 2.668          | 3.067          | 4.298          | 4.369          |
| 28          | 3.372          | 2.668          | 3.067          | 4.298          | 4.369          |
| 29          | 3.372          | 2.668          | 3.067          | 4.298          | 4.369          |
| 30          | 3.372          | 2.668          | 3.067          | 4.298          | 4.369          |

**Supplementary Table 36.** Carbon tax analysis within-policy sequence summary<sup>29</sup>.

| <b>Country</b> | <b>Year introduced</b> | <b>Initial rate (\$/tCO<sub>2</sub>)</b> | <b>2023 rate (\$/tCO<sub>2</sub>)</b> | <b>Escalation mechanism</b>                                               |
|----------------|------------------------|------------------------------------------|---------------------------------------|---------------------------------------------------------------------------|
| Canada         | 2019                   | 15                                       | 48                                    | Annual increase of 10–15, scheduled to reach ~125 by 2030                 |
| France         | 2014                   | 10                                       | 49                                    | Planned to rise to 100 by 2030, frozen after 2018 “Yellow Vests” protests |
| Switzerland    | 2008                   | 12                                       | 132                                   | Automatic increase if emission targets are missed                         |
| Colombia       | 2017                   | 5                                        | ~4–8                                  | Essentially frozen, only inflation adjustment                             |
| Japan          | 2012                   | 1.2                                      | 2.8                                   | Frozen since 2016                                                         |
| Singapore      | 2019                   | 3.7                                      | 3.7                                   | Will rise to 18 in 2024, 33 in 2026                                       |
| Argentina      | 2018                   | 6.2                                      | ~3                                    | Declined in real terms due to inflation & devaluation                     |
| Chile          | 2017                   | 5                                        | 5                                     | No escalation plan                                                        |
| Mexico         | 2014                   | 1–3                                      | ~3                                    | No escalation plan                                                        |
| South Africa   | 2019                   | 8                                        | 8                                     | Planned gradual increase                                                  |
| Uruguay        | 2023                   | ~140                                     | ~140                                  | Replaced existing fuel excise; essentially re-labeled                     |

|          |      |    |      |                                                 |
|----------|------|----|------|-------------------------------------------------|
| Finland  | 1990 | 7  | ~80  | Multiple reforms with gradual increases         |
| Sweden   | 1991 | 30 | ~130 | Incrementally raised; among the world's highest |
| Norway   | 1991 | 30 | ~90  | Sector-differentiated increases                 |
| Denmark  | 1992 | 14 | ~27  | Planned further rise post-2025                  |
| Iceland  | 2010 | 15 | ~33  | Aligned with EU ETS                             |
| Ireland  | 2010 | 20 | ~41  | Gradual increases, target ~100 by 2030          |
| Latvia   | 2004 | 1  | ~6   | Persistently low level                          |
| Slovenia | 1996 | 5  | ~20  | Largely stable                                  |

---

**Supplementary Table 37.** The trend of caprylic acid minimum selling price (MSP) changes, influenced by the price of carbon dioxide, varies across different industrial sources.

| <b>Industrial sectors<sup>30</sup></b> | <b>CO<sub>2</sub> price (\$/ton)<sup>30</sup></b> | <b>MSP (\$/kg)</b> | <b>Relative deviation from market price</b> |
|----------------------------------------|---------------------------------------------------|--------------------|---------------------------------------------|
|                                        | 5.6                                               | 4.300              | -26.37%                                     |
| Liquid-gas fuels                       | 6.4                                               | 4.328              | -25.91%                                     |
|                                        | 16.1                                              | 4.652              | -20.34%                                     |
|                                        | 31.8                                              | 5.178              | -11.34%                                     |
| Refinery hydrogen                      | 57.3                                              | 6.033              | 3.29%                                       |
|                                        | 59.9                                              | 6.120              | 4.78%                                       |
| Cement                                 | 60.8                                              | 6.150              | 5.30%                                       |
|                                        | 62.7                                              | 6.214              | 6.39%                                       |
| Iron / steel                           | 65.4                                              | 6.304              | 7.93%                                       |
|                                        | 65.9                                              | 6.321              | 8.22%                                       |
| Pulp / paper                           | 48.3                                              | 5.731              | -1.87%                                      |

**Supplementary Table 38.** Reference prices of natural gas or methane by country benchmark market.

| <b>Country</b> | <b>\$/MMBtu</b> | <b>\$/m<sup>3</sup><sup>a</sup></b> | <b>\$/ton<sup>b</sup></b> | <b>References</b> |
|----------------|-----------------|-------------------------------------|---------------------------|-------------------|
| United States  | 2.91            | 0.099                               | 137.934                   | 31                |
| Europe         | 12.21           | 0.415                               | 578.754                   | 32                |
| British        | 11              | 0.374                               | 521.400                   | 33                |
| Japan          | 11.61           | 0.395                               | 550.314                   | 34                |
| China          | 11.64           | 0.396                               | 551.736                   | 35                |
| India          | 6.89            | 0.234                               | 326.586                   | 36                |
| Australia      | 8               | 0.272                               | 379.200                   | 37                |

a. 1 m<sup>3</sup> = 0.035 MMBtu

b. 1 ton = 47.4 MMBtu

**Supplementary Table 39.** Reference prices of methane by different sources.

| <b>Carbon sources</b> | <b>\$/MMBtu</b> | <b>\$/m<sup>3</sup> <sup>a</sup></b> | <b>\$/ton <sup>b</sup></b> | <b>References</b> |
|-----------------------|-----------------|--------------------------------------|----------------------------|-------------------|
| China shale gas       | 8.618           | 0.293                                | 408.476                    | 38                |
| US shale gas          | 6.471           | 0.220                                | 306.706                    | 38                |
| China coalbed methane | 6.059           | 0.206                                | 287.188                    | 38                |
| China coalbed methane | 4.618           | 0.157                                | 218.876                    | 39                |
| Biodigester           | 9.300           | 0.316                                | 983.000                    | 40                |
| Wastewater            | 14.600          | 0.496                                | 692.040                    | 40                |
| Landfill gas          | 2.400           | 0.082                                | 113.760                    | 40                |

a. 1 m<sup>3</sup> = 0.035 MMBtu

b. 1 ton = 47.4 MMBtu

**Supplementary Table 40.** Scale of CO<sub>2</sub> conversion in pilot plants and techno-economic analysis.

| <b>Item</b>                                  | <b>CO<sub>2</sub> inflow</b> | <b>Reference</b> |
|----------------------------------------------|------------------------------|------------------|
| Mitsubishi Heavy Industries, Yokohama, Japan | 12.5 kg/h                    | 41               |
| Global Thermostat, Huntsville, Alabama, USA  | 167 kg/h                     | 41               |
| Carbon Clean Solutions, Tuticorin, India     | 417 kg/h                     | 41               |
| CRI's George Olah methanol plant, Iceland    | 500 kg/h                     | 42               |
| Green methanol plant, China                  | 2,000 kg/h                   | 43               |
| TEA for methanol production                  | 10,000 kg/h                  | 20               |
| TEA and LCA for methanol production          | 39,000 kg/h                  | 44               |

**Supplementary Table 41.** Major mass balance data for the annual production of 3,000-ton C<sub>6</sub>H<sub>12</sub>O<sub>2</sub> from fossil-based methanol (Case A1).

|                                               | Unit  | AIR     | BIO      | MED      | O2-IN    | AIR-IN   | BIO      | BIOMASS  | C6       | DCW      | LIPID    | SPENT    |
|-----------------------------------------------|-------|---------|----------|----------|----------|----------|----------|----------|----------|----------|----------|----------|
| O <sub>2</sub>                                | kg/hr | 7889.7  | 34.54758 | 0        | 7495.215 | 3187.93  | 0.034548 | 0        | 0        | 0        | 0        | 0        |
| CO <sub>2</sub>                               | kg/hr | 0       | 5425.993 | 0        | 0        | 0        | 5.425993 | 0        | 0        | 0        | 0        | 0        |
| CH <sub>4</sub>                               | kg/hr | 0       | 0        | 0        | 0        | 0        | 0        | 0        | 0        | 0        | 0        | 0        |
| N <sub>2</sub>                                | kg/hr | 29680.3 | 1484.015 | 0        | 1484.015 | 11992.69 | 1.484015 | 0        | 0.00E+00 | 0        | 0        | 0        |
| H <sub>2</sub> O                              | kg/hr | 0       | 65984.62 | 58812.27 | 0        | 0        | 65984.62 | 3299.231 | 4.56E-13 | 0.059586 | 0.05899  | 0.000596 |
| Biomass                                       | kg/hr | 0       | 2813.58  | 0        | 0        | 0        | 2813.58  | 2532.222 | 0        | 2532.222 | 0        | 0        |
| Chitosan                                      | kg/hr | 0       | 0        | 0        | 0        | 0        | 0        | 0.1265   | 1.25E-01 | 1.26E-01 | 1.25E-01 | 1.26E-03 |
| NH <sub>3</sub>                               | kg/hr | 0       | 5.747219 | 475      | 0        | 0        | 5.747219 | 0.287361 | 1.46E-24 | 3.60E-07 | 3.57E-07 | 3.60E-09 |
| Glucose                                       | kg/hr | 0       | 0        | 0        | 0        | 0        | 0        | 0        | 0        | 0        | 0        | 0        |
| Spent                                         | kg/hr | 0       | 0        | 0        | 0        | 0        | 0        | 0        | 21.52706 | 0        | 21.52706 | 2131.179 |
| MEOH                                          | kg/hr | 0       | 1218     | 0        | 0        | 0        | 1218     | 60.9     | 1.87E-11 | 0.000171 | 0.000169 | 1.71E-06 |
| 1-HEX                                         | kg/hr | 0       | 0        | 0        | 0        | 0        | 0        | 0        | 7.524    | 0        | 752.4    | 7.6      |
| C <sub>6</sub> H <sub>12</sub> O <sub>2</sub> | kg/hr | 0       | 0        | 0        | 0        | 0        | 0        | 0        | 371.9632 | 0        | 375.7204 | 3.795156 |

**Supplementary Table 42.** Major mass balance data for the annual production of 3,000-ton C<sub>8</sub>H<sub>16</sub>O<sub>2</sub> from fossil-based methanol (Case A2).

|                  | Unit  | AIR     | BIO      | MED      | MEOH | O2-IN    | AIR      | BIO      | BIOMASS  | C8       | DCW      | LIPID    | SPENT    |
|------------------|-------|---------|----------|----------|------|----------|----------|----------|----------|----------|----------|----------|----------|
| O <sub>2</sub>   | kg/hr | 7889.7  | 34.54758 | 0        | 0    | 7495.215 | 3187.93  | 0.034548 | 0        | 0        | 0        | 0        | 0        |
| CO <sub>2</sub>  | kg/hr | 0       | 5425.993 | 0        | 0    | 0        | 0        | 5.425993 | 0        | 0        | 0        | 0        | 0        |
| N <sub>2</sub>   | kg/hr | 29680.3 | 1484.015 | 0        | 0    | 1484.015 | 11992.69 | 1.484015 | 0        | 0        | 0        | 0        | 0        |
| H <sub>2</sub> O | kg/hr | 0       | 65984.62 | 58812.27 | 0    | 0        | 0        | 65984.62 | 3299.231 | 4.15E-41 | 0.059586 | 0.05899  | 0.000596 |
| Biomass          | kg/hr | 0       | 2813.58  | 0        | 0    | 0        | 0        | 2813.58  | 2532.222 | 0        | 2532.222 | 0        | 0        |
| Chitosan         | kg/hr | 0       | 0        | 0        | 0    | 0        | 0        | 0        | 0.1265   | 0.125235 | 0.1265   | 0.125235 | 0.001265 |
| NH <sub>3</sub>  | kg/hr | 0       | 5.747219 | 475      | 0    | 0        | 0        | 5.747219 | 0.287361 | 1.21E-44 | 3.60E-07 | 3.57E-07 | 3.60E-09 |
| Glucose          | kg/hr | 0       | 0        | 0        | 0    | 0        | 0        | 0        | 0        | 0        | 0        | 0        | 0        |
| Spent            | kg/hr | 0       | 0        | 0        | 0    | 0        | 0        | 0        | 0        | 21.52706 | 0        | 21.52706 | 2131.179 |
| MEOH             | kg/hr | 0       | 1218     | 0        | 8700 | 0        | 0        | 1218     | 60.9     | 2.09E-22 | 0.000171 | 0.000169 | 1.71E-06 |
| 1-HEX            | kg/hr | 0       | 0        | 0        | 0    | 0        | 0        | 0        | 0        | 7.502346 | 0        | 752.4    | 7.6      |
| C8               | kg/hr | 0       | 0        | 0        | 0    | 0        | 0        | 0        | 0        | 375.6773 | 0        | 375.7204 | 3.795156 |

**Supplementary Table 43.** Major mass balance data for the annual production of 3,000-ton C<sub>10</sub>H<sub>20</sub>O<sub>2</sub> from fossil-based methanol (Case A3).

|                  | Unit  | AIR     | BIO      | MEOH | NH3 | O2-IN    | AIR      | BIO      | BIOMASS  | C10-OUT  | LIPID    | SPENT    |
|------------------|-------|---------|----------|------|-----|----------|----------|----------|----------|----------|----------|----------|
| O <sub>2</sub>   | kg/hr | 7889.7  | 34.54758 | 0    | 0   | 7495.215 | 3187.93  | 0.034548 | 0        | 0        | 0        | 0        |
| CO <sub>2</sub>  | kg/hr | 0       | 5425.993 | 0    | 0   | 0        | 0        | 5.425993 | 0        | 0        | 0        | 0        |
| N <sub>2</sub>   | kg/hr | 29680.3 | 1484.015 | 0    | 0   | 1484.015 | 11992.69 | 1.484015 | 0        | 0        | 0        | 0        |
| H <sub>2</sub> O | kg/hr | 0       | 65984.62 | 0    | 0   | 0        | 0        | 65984.62 | 3299.231 | 1.13E-42 | 0.05899  | 0.000596 |
| Biomass          | kg/hr | 0       | 2813.58  | 0    | 0   | 0        | 0        | 2813.58  | 2532.222 | 0        | 0        | 0        |
| Chitosan         | kg/hr | 0       | 0        | 0    | 0   | 0        | 0        | 0        | 0.1265   | 0.125235 | 0.125235 | 0.001265 |
| NH <sub>3</sub>  | kg/hr | 0       | 5.747219 | 0    | 475 | 0        | 0        | 5.747219 | 0.287361 | 1.07E-44 | 3.57E-07 | 3.60E-09 |
| Glucose          | kg/hr | 0       | 0        | 0    | 0   | 0        | 0        | 0        | 0        | 0        | 0        | 0        |
| Spent            | kg/hr | 0       | 0        | 0    | 0   | 0        | 0        | 0        | 0        | 21.52706 | 21.52706 | 2131.179 |
| MEOH             | kg/hr | 0       | 1218     | 8700 | 0   | 0        | 0        | 1218     | 60.9     | 9.57E-23 | 0.000169 | 1.71E-06 |
| 1-HEX            | kg/hr | 0       | 0        | 0    | 0   | 0        | 0        | 0        | 0        | 7.466062 | 752.4    | 7.6      |
| C10              | kg/hr | 0       | 0        | 0    | 0   | 0        | 0        | 0        | 0        | 375.7135 | 375.7204 | 3.795156 |

**Supplementary Table 44.** Major mass balance data for the annual production of 3,000-ton C<sub>12</sub>H<sub>24</sub>O<sub>2</sub> from fossil-based methanol (Case A4).

|                  | Unit  | AIR     | BIO      | MED      | MEOH | NH3 | O2-IN    | AIR      | BIO      | BIOMASS  | C8-OUT   | LIPID    | SPENT    |
|------------------|-------|---------|----------|----------|------|-----|----------|----------|----------|----------|----------|----------|----------|
| O <sub>2</sub>   | kg/hr | 7889.7  | 34.54758 | 0        | 0    | 0   | 7495.215 | 3187.93  | 0.034548 | 0        | 0        | 0        | 0        |
| CO <sub>2</sub>  | kg/hr | 0       | 5425.993 | 0        | 0    | 0   | 0        | 0        | 5.425993 | 0        | 0        | 0        | 0        |
| N <sub>2</sub>   | kg/hr | 29680.3 | 1484.015 | 0        | 0    | 0   | 1484.015 | 11992.69 | 1.484015 | 0        | 0        | 0        | 0        |
| H <sub>2</sub> O | kg/hr | 0       | 65984.62 | 58812.27 | 0    | 0   | 0        | 0        | 65984.62 | 3299.231 | 6.91E-44 | 0.05899  | 0.000596 |
| Biomass          | kg/hr | 0       | 2813.58  | 0        | 0    | 0   | 0        | 0        | 2813.58  | 2532.222 | 0        | 0        | 0        |
| Chitosan         | kg/hr | 0       | 0        | 0        | 0    | 0   | 0        | 0        | 0        | 0.1265   | 0.125235 | 0.125235 | 0.001265 |
| NH <sub>3</sub>  | kg/hr | 0       | 5.747219 | 475      | 0    | 475 | 0        | 0        | 5.747219 | 0.287361 | 9.68E-45 | 3.57E-07 | 3.60E-09 |
| Glucose          | kg/hr | 0       | 0        | 0        | 0    | 0   | 0        | 0        | 0        | 0        | 0        | 0        | 0        |
| Spent            | kg/hr | 0       | 0        | 0        | 0    | 0   | 0        | 0        | 0        | 0        | 21.52706 | 21.52706 | 2131.179 |
| MEOH             | kg/hr | 0       | 1218     | 0        | 8700 | 0   | 0        | 0        | 1218     | 60.9     | 5.44E-23 | 0.000169 | 1.71E-06 |
| 1-HEX            | kg/hr | 0       | 0        | 0        | 0    | 0   | 0        | 0        | 0        | 0        | 7.460405 | 752.4    | 7.6      |
| C12              | kg/hr | 0       | 0        | 0        | 0    | 0   | 0        | 0        | 0        | 0        | 375.7192 | 375.7204 | 3.795156 |

**Supplementary Table 45.** Major mass balance data for the annual production of 3,000-ton mixed MCFAs from fossil-based methanol (Case A5).

|                  | Unit  | BIO      | MED      | MEOH | AIR    | BIOMASS  | C6-OUT   | C8-OUT   | C10H20O2 | C12H24O2 | DCW      | LIPID    | SPENT    |
|------------------|-------|----------|----------|------|--------|----------|----------|----------|----------|----------|----------|----------|----------|
| O <sub>2</sub>   | kg/hr | 2.627583 | 0        | 0    | 1940.4 | 0        | 0        | 0        | 0        | 0        | 0        | 0        | 0        |
| CO <sub>2</sub>  | kg/hr | 5425.993 | 0        | 0    | 0      | 0        | 0        | 0        | 0        | 0        | 0        | 0        | 0        |
| N <sub>2</sub>   | kg/hr | 1477.695 | 0        | 0    | 7299.6 | 0        | 0        | 0        | 0        | 0        | 0        | 0        | 0        |
| H <sub>2</sub> O | kg/hr | 65739.57 | 58567.22 | 0    | 0      | 3286.978 | 0        | 0        | 0        | 0        | 0.036278 | 0.035915 | 0.000363 |
| Biomass          | kg/hr | 2813.58  | 0        | 0    | 0      | 2532.222 | 0        | 0        | 0        | 0        | 2532.222 | 0        | 0        |
| Chitosan         | kg/hr | 0        | 0        | 0    | 0      | 0.077    | 3.24E-07 | 0        | 0        | 0.07623  | 0.077    | 0.07623  | 0.00077  |
| NH <sub>3</sub>  | kg/hr | 0.747219 | 470      | 0    | 0      | 0.037361 | 0        | 0        | 0        | 0        | 2.86E-08 | 2.83E-08 | 2.86E-10 |
| Glucose          | kg/hr | 0        | 0        | 0    | 0      | 0        | 0        | 0        | 0        | 0        | 0        | 0        | 0        |
| Spent            | kg/hr | 0        | 0        | 0    | 0      | 0        | 0        | 0        | 0        | 21.52706 | 0        | 21.52706 | 2131.179 |
| MEOH             | kg/hr | 1218     | 0        | 8700 | 0      | 60.9     | 0        | 0        | 0        | 0        | 0.000104 | 0        | 0        |
| 1-HEX            | kg/hr | 0        | 0        | 0    | 0      | 0        | 0.987625 | 0.002375 | 0        | 0        | 0        | 99       | 1        |
| C6               | kg/hr | 0        | 0        | 0    | 0      | 0        | 67.58009 | 0.682627 | 0        | 0        | 0        | 68.95224 | 0.696487 |
| C8               | kg/hr | 0        | 0        | 0    | 0      | 0        | 0.856039 | 83.90037 | 0.847478 | 3.04E-07 | 0        | 85.60389 | 0.864686 |
| C10              | kg/hr | 0        | 0        | 0    | 0      | 0        | 0.091287 | 1.021632 | 100.1302 | 1.011416 | 0        | 102.2545 | 1.032874 |
| C12              | kg/hr | 0        | 0        | 0    | 0      | 0        | 0.009375 | 0        | 1.189004 | 117.7114 | 0        | 118.9098 | 1.201109 |

**Supplementary Table 46.** Major mass balance data for the annual production of 3,000-ton C<sub>6</sub>H<sub>12</sub>O<sub>2</sub> from glucose (Case B1).

|                  | Unit      | GL<br>U | GLU-<br>OUT | 3HP-<br>BIO | AIR        | BIO          | GL<br>U | MED          | O2-IN       | AIR          | BIO          | BIOMAS<br>S | C6H12O<br>2 | LIPID        | SPENT        |
|------------------|-----------|---------|-------------|-------------|------------|--------------|---------|--------------|-------------|--------------|--------------|-------------|-------------|--------------|--------------|
| O <sub>2</sub>   | kg/h<br>r | 0       | 0           | 0.002212    | 1180.<br>2 | 2.21222<br>5 | 0       | 0            | 1121.1<br>9 | 2314.67<br>5 | 0.00221<br>2 | 0           | 0           | 0            | 0            |
| CO <sub>2</sub>  | kg/h<br>r | 0       | 0           | 1.758851    | 0          | 1758.85<br>1 | 0       | 0            | 0           | 0            | 1.75885<br>1 | 0           | 0           | 0            | 0            |
| N <sub>2</sub>   | kg/h<br>r | 0       | 0           | 0.22199     | 4439.<br>8 | 221.99       | 0       | 0            | 221.99      | 8707.58<br>5 | 0.22199      | 0           | 0           | 0            | 0            |
| H <sub>2</sub> O | kg/h<br>r | 0       | 0           | 43784.12    | 0          | 43784.1<br>2 | 0       | 42524.1<br>5 | 0           | 0            | 43784.1<br>2 | 2189.206    | 5.04E-32    | 0.04522<br>3 | 0.00045<br>7 |
| Biomass          | kg/h<br>r | 0       | 0           | 2040.474    | 0          | 2040.47<br>4 | 0       | 0            | 0           | 0            | 2040.47<br>4 | 1836.426    | 0           | 0            | 0            |
| Chitosa<br>n     | kg/h<br>r | 0       | 0           | 0           | 0          | 0            | 0       | 0            | 0           | 0            | 0            | 0.092       | 0.09108     | 0.09108      | 0.00092      |
| NH <sub>3</sub>  | kg/h<br>r | 0       | 0           | 4.686914    | 0          | 4.68691<br>4 | 0       | 345          | 0           | 0            | 4.68691<br>4 | 0.234346    | 1.17E-43    | 3.37E-07     | 3.41E-09     |
| Glucose          | kg/h<br>r | 7222    | 6499.8      | 400         | 0          | 400          | 4000    | 0            | 0           | 0            | 400          | 0           | 0           | 0            | 0            |
| Spent            | kg/h<br>r | 0       | 0           | 0           | 0          | 0            | 0       | 0            | 0           | 0            | 0            | 0           | 14.50647    | 14.5064<br>7 | 1436.14<br>1 |
| 1-HEX            | kg/h<br>r | 0       | 0           | 0           | 0          | 0            | 0       | 0            | 0           | 0            | 0            | 0           | 60.02746    | 752.4        | 7.6          |
| C6               | kg/h<br>r | 0       | 0           | 0           | 0          | 0            | 0       | 0            | 0           | 0            | 0            | 0           | 324.339     | 381.921<br>3 | 3.85779<br>1 |

**Supplementary Table 47.** Major mass balance data for the annual production of 3,000-ton C<sub>8</sub>H<sub>16</sub>O<sub>2</sub> from glucose (Case B2).

|                  | Unit  | GLU-IN | GLU-OUT | AIR    | BIO      | GLU  | MED      | N2-OUT  | O2-IN   | AIR      | BIO      | BIOMASS  | C8H16O2  | LIPID    | SPENT    |
|------------------|-------|--------|---------|--------|----------|------|----------|---------|---------|----------|----------|----------|----------|----------|----------|
| O <sub>2</sub>   | kg/hr | 0      | 0       | 1180.2 | 2.212225 | 0    | 0        | 59.01   | 1121.19 | 2314.675 | 0.002212 | 0        | 0        | 0        | 0        |
| CO <sub>2</sub>  | kg/hr | 0      | 0       | 0      | 1758.851 | 0    | 0        | 0       | 0       | 0        | 1.758851 | 0        | 0        | 0        | 0        |
| N <sub>2</sub>   | kg/hr | 0      | 0       | 4439.8 | 221.99   | 0    | 0        | 4217.81 | 221.99  | 8707.585 | 0.22199  | 0        | 0        | 0        | 0        |
| H <sub>2</sub> O | kg/hr | 0      | 0       | 0      | 43784.12 | 0    | 42524.15 | 0       | 0       | 0        | 43784.12 | 2189.206 | 4.11E-41 | 0.045223 | 0.000457 |
| Biomass          | kg/hr | 0      | 0       | 0      | 2040.474 | 0    | 0        | 0       | 0       | 0        | 2040.474 | 1836.426 | 0        | 0        | 0        |
| Chitosan         | kg/hr | 0      | 0       | 0      | 0        | 0    | 0        | 0       | 0       | 0        | 0        | 0.092    | 0.09108  | 0.09108  | 0.00092  |
| NH <sub>3</sub>  | kg/hr | 0      | 0       | 0      | 4.686914 | 0    | 345      | 0       | 0       | 0        | 4.686914 | 0.234346 | 4.71E-45 | 3.37E-07 | 3.41E-09 |
| Glucose          | kg/hr | 7222   | 6499.8  | 0      | 400      | 4000 | 0        | 0       | 0       | 0        | 400      | 0        | 0        | 0        | 0        |
| Spent            | kg/hr | 0      | 0       | 0      | 0        | 0    | 0        | 0       | 0       | 0        | 0        | 0        | 14.50647 | 14.50647 | 1436.141 |
| 1-HEX            | kg/hr | 0      | 0       | 0      | 0        | 0    | 0        | 0       | 0       | 0        | 0        | 0        | 2.489333 | 752.4    | 7.6      |
| C8               | kg/hr | 0      | 0       | 0      | 0        | 0    | 0        | 0       | 0       | 0        | 0        | 0        | 381.8772 | 381.9213 | 3.857791 |

**Supplementary Table 48.** Major mass balance data for the annual production of 3,000-ton C<sub>10</sub>H<sub>20</sub>O<sub>2</sub> from glucose (Case B3).

|                  | Unit  | GLU  | GLU-OUT | AIR    | BIO      | GLU  | MED      | O2-IN   | AIR      | BIO      | BIOMASS  | C10H20O2 | LIPID    | SPENT    |
|------------------|-------|------|---------|--------|----------|------|----------|---------|----------|----------|----------|----------|----------|----------|
| O <sub>2</sub>   | kg/hr | 0    | 0       | 1180.2 | 2.212225 | 0    | 0        | 1121.19 | 2314.675 | 0.002212 | 0        | 0        | 0        | 0        |
| CO <sub>2</sub>  | kg/hr | 0    | 0       | 0      | 1758.851 | 0    | 0        | 0       | 0        | 1.758851 | 0        | 0        | 0        | 0        |
| N <sub>2</sub>   | kg/hr | 0    | 0       | 4439.8 | 221.99   | 0    | 0        | 221.99  | 8707.585 | 0.22199  | 0        | 0        | 0        | 0        |
| H <sub>2</sub> O | kg/hr | 0    | 0       | 0      | 43784.12 | 0    | 42524.15 | 0       | 0        | 43784.12 | 2189.206 | 1.67E-42 | 0.045223 | 0.000457 |
| Biomass          | kg/hr | 0    | 0       | 0      | 2040.474 | 0    | 0        | 0       | 0        | 2040.474 | 1836.426 | 0        | 0        | 0        |
| Chitosan         | kg/hr | 0    | 0       | 0      | 0        | 0    | 0        | 0       | 0        | 0        | 0.092    | 0.09108  | 0.09108  | 0.00092  |
| NH <sub>3</sub>  | kg/hr | 0    | 0       | 0      | 4.686914 | 0    | 345      | 0       | 0        | 4.686914 | 0.234346 | 4.21E-45 | 3.37E-07 | 3.41E-09 |
| Glucose          | kg/hr | 7222 | 6499.8  | 0      | 400      | 4000 | 0        | 0       | 0        | 400      | 0        | 0        | 0        | 0        |
| Spent            | kg/hr | 0    | 0       | 0      | 0        | 0    | 0        | 0       | 0        | 0        | 0        | 14.50647 | 14.50647 | 1436.141 |
| 1-HEX            | kg/hr | 0    | 0       | 0      | 0        | 0    | 0        | 0       | 0        | 0        | 0        | 2.452271 | 752.4    | 7.6      |
| C10              | kg/hr | 0    | 0       | 0      | 0        | 0    | 0        | 0       | 0        | 0        | 0        | 381.9142 | 381.9213 | 3.857791 |

**Supplementary Table 49.** Major mass balance data for the annual production of 3,000-ton C<sub>12</sub>H<sub>24</sub>O<sub>2</sub> from glucose (Case B4).

|                  | Unit  | GLU  | GLU-OUT | AIR    | BIO      | GLU  | MED      | O2-IN   | AIR      | BIO      | BIOMASS  | C12H24O2 | LIPID    | SPENT    |
|------------------|-------|------|---------|--------|----------|------|----------|---------|----------|----------|----------|----------|----------|----------|
| O <sub>2</sub>   | kg/hr | 0    | 0       | 1180.2 | 2.212225 | 0    | 0        | 1121.19 | 2314.675 | 0.002212 | 0        | 0        | 0        | 0        |
| CO <sub>2</sub>  | kg/hr | 0    | 0       | 0      | 1758.851 | 0    | 0        | 0       | 0        | 1.758851 | 0        | 0        | 0        | 0        |
| N <sub>2</sub>   | kg/hr | 0    | 0       | 4439.8 | 221.99   | 0    | 0        | 221.99  | 8707.585 | 0.22199  | 0        | 0        | 0        | 0        |
| H <sub>2</sub> O | kg/hr | 0    | 0       | 0      | 43784.12 | 0    | 42524.15 | 0       | 0        | 43784.12 | 2189.206 | 1.14E-43 | 0.045223 | 0.000457 |
| Biomass          | kg/hr | 0    | 0       | 0      | 2040.474 | 0    | 0        | 0       | 0        | 2040.474 | 1836.426 | 0        | 0        | 0        |
| Chitosan         | kg/hr | 0    | 0       | 0      | 0        | 0    | 0        | 0       | 0        | 0        | 0.092    | 0.09108  | 0.09108  | 0.00092  |
| NH <sub>3</sub>  | kg/hr | 0    | 0       | 0      | 4.686914 | 0    | 345      | 0       | 0        | 4.686914 | 0.234346 | 3.84E-45 | 3.37E-07 | 3.41E-09 |
| Glucose          | kg/hr | 7222 | 6499.8  | 0      | 400      | 4000 | 0        | 0       | 0        | 400      | 0        | 0        | 0        | 0        |
| Spent            | kg/hr | 0    | 0       | 0      | 0        | 0    | 0        | 0       | 0        | 0        | 0        | 14.50647 | 14.50647 | 1436.141 |
| 1-HEX            | kg/hr | 0    | 0       | 0      | 0        | 0    | 0        | 0       | 0        | 0        | 0        | 2.446491 | 752.4    | 7.6      |
| C10              | kg/hr | 0    | 0       | 0      | 0        | 0    | 0        | 0       | 0        | 0        | 0        | 381.92   | 381.9213 | 3.857791 |

**Supplementary Table 50.** Major mass balance data for the annual production of 3,000-ton mixed MCFAs from glucose (Case B5).

|                  | Unit      | GL<br>U  | GLU-<br>OUT | BIO          | GL<br>U  | MED          | O2-IN       | BIO          | BIOMAS<br>S | C6-OUT       | C8-OUT       | C10H20O<br>2 | C12H24O<br>2 | LIPID        | SPENT        |
|------------------|-----------|----------|-------------|--------------|----------|--------------|-------------|--------------|-------------|--------------|--------------|--------------|--------------|--------------|--------------|
| O <sub>2</sub>   | kg/h<br>r | 0        | 0           | 2.21222<br>5 | 0        | 0            | 1121.1<br>9 | 0.00221<br>2 | 0           | 0            | 0            | 0            | 0            | 0            | 0            |
| CO <sub>2</sub>  | kg/h<br>r | 0        | 0           | 1758.85<br>1 | 0        | 0            | 0           | 1.75885<br>1 | 0           | 0            | 0            | 0            | 0            | 0            | 0            |
| N <sub>2</sub>   | kg/h<br>r | 0        | 0           | 221.99       | 0        | 0            | 221.99      | 0.22199      | 0           | 0            | 0            | 0            | 0            | 0            | 0            |
| H <sub>2</sub> O | kg/h<br>r | 0        | 0           | 43784.1<br>2 | 0        | 42524.1<br>5 | 0           | 43784.1<br>2 | 2189.206    | 0            | 0            | 0            | 0            | 0.04522<br>3 | 0.00045<br>7 |
| Biomass          | kg/h<br>r | 0        | 0           | 2040.47<br>4 | 0        | 0            | 0           | 2040.47<br>4 | 1836.426    | 0            | 0            | 0            | 0            | 0            | 0            |
| Chitosa<br>n     | kg/h<br>r | 0        | 0           | 4.68691<br>4 | 0        | 345          | 0           | 4.68691<br>4 | 0.234346    | 0            | 0            | 0            | 0            | 3.37E-<br>07 | 3.41E-<br>09 |
| NH <sub>3</sub>  | kg/h<br>r | 722<br>2 | 6499.8      | 400          | 400<br>0 | 0            | 0           | 400          | 0           | 0            | 0            | 0            | 0            | 0            | 0            |
| Glucose          | kg/h<br>r | 0        | 0           | 0            | 0        | 0            | 0           | 0            | 0           | 0            | 0            | 0            | 14.50647     | 14.5064<br>7 | 1436.14<br>1 |
| Spent            | kg/h<br>r | 0        | 0           | 0            | 0        | 0            | 0           | 0            | 0           | 7.50597      | 0.01803      | 0            | 0            | 752.4        | 7.6          |
| C6               | kg/h<br>r | 0        | 0           | 0            | 0        | 0            | 0           | 0            | 0           | 68.6954<br>2 | 0.69389<br>3 | 0            | 0            | 70.0902<br>1 | 0.70798<br>2 |
| C8               | kg/h<br>r | 0        | 0           | 0            | 0        | 0            | 0           | 0            | 0           | 0.87016<br>3 | 85.2847<br>2 | 0.861461     | 3.08E-07     | 87.0166<br>8 | 0.87895<br>6 |
| C10              | kg/h<br>r | 0        | 0           | 0            | 0        | 0            | 0           | 0            | 0           | 0.09292<br>5 | 1.03848<br>8 | 101.7822     | 1.028103     | 103.942<br>1 | 1.04992      |
| C12              | kg/h<br>r | 0        | 0           | 0            | 0        | 0            | 0           | 0            | 0           | 0.00956<br>9 | 0            | 1.208622     | 119.6536     | 120.872<br>3 | 1.22093<br>2 |

**Supplementary Table 51.** Major mass balance data for the annual production of 3,000-ton C<sub>6</sub>H<sub>12</sub>O<sub>2</sub> from corncob residues (Case C1).

|                  | Unit  | GLU  | GLU-OUT | AIR  | BIO      | MED      | O2-IN   | AIR      | BIO      | BIOMASS  | C6       | LIPID    | SPENT    |
|------------------|-------|------|---------|------|----------|----------|---------|----------|----------|----------|----------|----------|----------|
| O <sub>2</sub>   | kg/hr | 0    | 0       | 1407 | 2.269003 | 0        | 1336.65 | 2314.675 | 0.002269 | 0        | 0        | 0        | 0        |
| CO <sub>2</sub>  | kg/hr | 0    | 0       | 0    | 2097.43  | 0        | 0       | 0        | 2.09743  | 0        | 0        | 0        | 0        |
| N <sub>2</sub>   | kg/hr | 0    | 0       | 5293 | 264.65   | 0        | 264.65  | 8707.585 | 0.26465  | 0        | 0        | 0        | 0        |
| H <sub>2</sub> O | kg/hr | 0    | 0       | 0    | 52212.74 | 50710.23 | 0       | 0        | 52212.74 | 2610.637 | 4.48E-32 | 0.04523  | 0.000457 |
| Biomass          | kg/hr | 0    | 0       | 0    | 2433.265 | 0        | 0       | 0        | 2433.265 | 2189.938 | 0        | 0        | 0        |
| Chitosan         | kg/hr | 0    | 0       | 0    | 0        | 0        | 0       | 0        | 0        | 0.092    | 0.09108  | 0.09108  | 0.00092  |
| NH <sub>3</sub>  | kg/hr | 0    | 0       | 0    | 4.176645 | 410      | 0       | 0        | 4.176645 | 0.208832 | 8.63E-44 | 2.52E-07 | 2.55E-09 |
| Glucose          | kg/hr | 5300 | 4770    | 0    | 477      | 0        | 0       | 0        | 477      | 0        | 0        | 0        | 0        |
| Spent            | kg/hr | 0    | 0       | 0    | 0        | 0        | 0       | 0        | 0        | 0        | 18.06569 | 18.06569 | 1788.503 |
| 1-HEX            | kg/hr | 0    | 0       | 0    | 0        | 0        | 0       | 0        | 0        | 0        | 59.68623 | 752.4    | 7.6      |
| C6               | kg/hr | 0    | 0       | 0    | 0        | 0        | 0       | 0        | 0        | 0        | 322.2947 | 379.5356 | 3.833693 |

**Supplementary Table 52.** Major mass balance data for the annual production of 3,000-ton C<sub>8</sub>H<sub>16</sub>O<sub>2</sub> from corncob residues (Case C2).

|                  | Unit  | GLU  | GLU-OUT | AIR  | BIO      | MED      | O2-IN   | AIR      | BIO      | BIOMASS  | C8       | LIPID    | SPENT    |
|------------------|-------|------|---------|------|----------|----------|---------|----------|----------|----------|----------|----------|----------|
| O <sub>2</sub>   | kg/hr | 0    | 0       | 1407 | 2.269003 | 0        | 1336.65 | 2314.675 | 0.002269 | 0        | 0        | 0        | 0        |
| CO <sub>2</sub>  | kg/hr | 0    | 0       | 0    | 2097.43  | 0        | 0       | 0        | 2.09743  | 0        | 0        | 0        | 0        |
| N <sub>2</sub>   | kg/hr | 0    | 0       | 5293 | 264.65   | 0        | 264.65  | 8707.585 | 0.26465  | 0        | 0        | 0        | 0        |
| H <sub>2</sub> O | kg/hr | 0    | 0       | 0    | 52212.74 | 50710.23 | 0       | 0        | 52212.74 | 2610.637 | 3.73E-41 | 0.04523  | 0.000457 |
| Biomass          | kg/hr | 0    | 0       | 0    | 2433.265 | 0        | 0       | 0        | 2433.265 | 2189.938 | 0        | 0        | 0        |
| Chitosan         | kg/hr | 0    | 0       | 0    | 0        | 0        | 0       | 0        | 0        | 0.092    | 0.09108  | 0.09108  | 0.00092  |
| NH <sub>3</sub>  | kg/hr | 0    | 0       | 0    | 4.176645 | 410      | 0       | 0        | 4.176645 | 0.208832 | 3.51E-45 | 2.52E-07 | 2.55E-09 |
| Glucose          | kg/hr | 5300 | 4770    | 0    | 477      | 0        | 0       | 0        | 477      | 0        | 0        | 0        | 0        |
| Spent            | kg/hr | 0    | 0       | 0    | 0        | 0        | 0       | 0        | 0        | 0        | 18.06569 | 18.06569 | 1788.503 |
| 1-HEX            | kg/hr | 0    | 0       | 0    | 0        | 0        | 0       | 0        | 0        | 0        | 2.489052 | 752.4    | 7.6      |
| C8               | kg/hr | 0    | 0       | 0    | 0        | 0        | 0       | 0        | 0        | 0        | 379.4918 | 379.5356 | 3.833693 |

**Supplementary Table 53.** Major mass balance data for the annual production of 3,000-ton C<sub>10</sub>H<sub>20</sub>O<sub>2</sub> from corncob residues (Case C3).

|                  | Unit  | GLU  | GLU-OUT | AIR  | BIO      | MED      | O2-IN   | AIR      | BIO      | BIOMASS  | C10      | LIPID    | SPENT    |
|------------------|-------|------|---------|------|----------|----------|---------|----------|----------|----------|----------|----------|----------|
| O <sub>2</sub>   | kg/hr | 0    | 0       | 1407 | 2.269003 | 0        | 1336.65 | 2314.675 | 0.002269 | 0        | 0        | 0        | 0        |
| CO <sub>2</sub>  | kg/hr | 0    | 0       | 0    | 2097.43  | 0        | 0       | 0        | 2.09743  | 0        | 0        | 0        | 0        |
| N <sub>2</sub>   | kg/hr | 0    | 0       | 5293 | 264.65   | 0        | 264.65  | 8707.585 | 0.26465  | 0        | 0        | 0        | 0        |
| H <sub>2</sub> O | kg/hr | 0    | 0       | 0    | 52212.74 | 50710.23 | 0       | 0        | 52212.74 | 2610.637 | 1.53E-42 | 0.04523  | 0.000457 |
| Biomass          | kg/hr | 0    | 0       | 0    | 2433.265 | 0        | 0       | 0        | 2433.265 | 2189.938 | 0        | 0        | 0        |
| Chitosan         | kg/hr | 0    | 0       | 0    | 0        | 0        | 0       | 0        | 0        | 0.092    | 0.09108  | 0.09108  | 0.00092  |
| NH <sub>3</sub>  | kg/hr | 0    | 0       | 0    | 4.176645 | 410      | 0       | 0        | 4.176645 | 0.208832 | 3.14E-45 | 2.52E-07 | 2.55E-09 |
| Glucose          | kg/hr | 5300 | 4770    | 0    | 477      | 0        | 0       | 0        | 477      | 0        | 0        | 0        | 0        |
| Spent            | kg/hr | 0    | 0       | 0    | 0        | 0        | 0       | 0        | 0        | 0        | 18.06569 | 18.06569 | 1788.503 |
| 1-HEX            | kg/hr | 0    | 0       | 0    | 0        | 0        | 0       | 0        | 0        | 0        | 2.452232 | 752.4    | 7.6      |
| C10              | kg/hr | 0    | 0       | 0    | 0        | 0        | 0       | 0        | 0        | 0        | 379.5286 | 379.5356 | 3.833693 |

**Supplementary Table 54.** Major mass balance data for the annual production of 3,000-ton C<sub>12</sub>H<sub>24</sub>O<sub>2</sub> from corncob residues (Case C4).

|                  | Unit  | GLU  | GLU-OUT | AIR  | BIO      | MED      | O2-IN   | AIR      | BIO      | BIOMASS  | C12      | LIPID    | SPENT    |
|------------------|-------|------|---------|------|----------|----------|---------|----------|----------|----------|----------|----------|----------|
| O <sub>2</sub>   | kg/hr | 0    | 0       | 1407 | 2.269003 | 0        | 1336.65 | 2314.675 | 0.002269 | 0        | 0        | 0        | 0        |
| CO <sub>2</sub>  | kg/hr | 0    | 0       | 0    | 2097.43  | 0        | 0       | 0        | 2.09743  | 0        | 0        | 0        | 0        |
| N <sub>2</sub>   | kg/hr | 0    | 0       | 5293 | 264.65   | 0        | 264.65  | 8707.585 | 0.26465  | 0        | 0        | 0        | 0        |
| H <sub>2</sub> O | kg/hr | 0    | 0       | 0    | 52212.74 | 50710.23 | 0       | 0        | 52212.74 | 2610.637 | 1.05E-43 | 0.04523  | 0.000457 |
| Biomass          | kg/hr | 0    | 0       | 0    | 2433.265 | 0        | 0       | 0        | 2433.265 | 2189.938 | 0        | 0        | 0        |
| Chitosan         | kg/hr | 0    | 0       | 0    | 0        | 0        | 0       | 0        | 0        | 0.092    | 0.09108  | 0.09108  | 0.00092  |
| NH <sub>3</sub>  | kg/hr | 0    | 0       | 0    | 4.176645 | 410      | 0       | 0        | 4.176645 | 0.208832 | 2.87E-45 | 2.52E-07 | 2.55E-09 |
| Glucose          | kg/hr | 5300 | 4770    | 0    | 477      | 0        | 0       | 0        | 477      | 0        | 0        | 0        | 0        |
| Spent            | kg/hr | 0    | 0       | 0    | 0        | 0        | 0       | 0        | 0        | 0        | 18.06569 | 18.06569 | 1788.503 |
| 1-HEX            | kg/hr | 0    | 0       | 0    | 0        | 0        | 0       | 0        | 0        | 0        | 2.446494 | 752.4    | 7.6      |
| C12              | kg/hr | 0    | 0       | 0    | 0        | 0        | 0       | 0        | 0        | 0        | 379.5344 | 379.5356 | 3.833693 |

**Supplementary Table 55.** Major mass balance data for the annual production of 3,000-ton mixed MCFAs from corncob residues (Case C5).

|                  | Unit      | GL<br>U  | GLU-<br>OUT | BIO          | MED          | NH<br>3 | O2-IN       | BIO          | BIOMAS<br>S | C6H12O<br>2 | C8-OUT       | C10H20O<br>2 | C12H24O<br>2 | LIPID        | SPENT        |
|------------------|-----------|----------|-------------|--------------|--------------|---------|-------------|--------------|-------------|-------------|--------------|--------------|--------------|--------------|--------------|
| O <sub>2</sub>   | kg/h<br>r | 0        | 0           | 2.26900<br>3 | 0            | 0       | 1336.6<br>5 | 0.00226<br>9 | 0           | 0           | 0            | 0            | 0            | 0            | 0            |
| CO <sub>2</sub>  | kg/h<br>r | 0        | 0           | 2097.43      | 0            | 0       | 0           | 2.09743      | 0           | 0           | 0            | 0            | 0            | 0            | 0            |
| N <sub>2</sub>   | kg/h<br>r | 0        | 0           | 264.65       | 0            | 0       | 264.65      | 0.26465      | 0           | 0           | 0            | 0            | 0            | 0            | 0            |
| H <sub>2</sub> O | kg/h<br>r | 0        | 0           | 52212.7<br>4 | 50710.2<br>3 | 0       | 0           | 52212.7<br>4 | 2610.637    | 0           | 0            | 0            | 0            | 0.04523      | 0.00045<br>7 |
| Biomass          | kg/h<br>r | 0        | 0           | 2433.26<br>5 | 0            | 0       | 0           | 2433.26<br>5 | 2189.938    | 0           | 0            | 0            | 0            | 0            | 0            |
| Chitosan         | kg/h<br>r | 0        | 0           | 0            | 0            | 0       | 0           | 0            | 0.092       | 2.91E-07    | 0            | 0            | 0.091079     | 9.11E-<br>02 | 0.00092      |
| NH <sub>3</sub>  | kg/h<br>r | 0        | 0           | 4.17664<br>5 | 410          | 410     | 0           | 4.17664<br>5 | 0.208832    | 0.00E+00    | 0            | 0.00E+00     | 0.00E+00     | 2.52E-<br>07 | 2.55E-<br>09 |
| Glucose          | kg/h<br>r | 530<br>0 | 4770        | 477          | 0            | 0       | 0           | 477          | 0           | 0           | 0            | 0            | 0            | 0            | 0            |
| Spent            | kg/h<br>r | 0        | 0           | 0            | 0            | 0       | 0           | 0            | 0           | 0           | 0            | 0            | 18.06569     | 18.0656<br>9 | 1788.50<br>3 |
| 1-HEX            | kg/h<br>r | 0        | 0           | 0            | 0            | 0       | 0           | 0            | 0           | 7.50597     | 0.01803      | 0            | 0            | 752.4        | 7.6          |
| C6               | kg/h<br>r | 0        | 0           | 0            | 0            | 0       | 0           | 0            | 0           | 68.26631    | 0.68955<br>9 | 0            | 0            | 69.6524      | 0.70356      |
| C8               | kg/h<br>r | 0        | 0           | 0            | 0            | 0       | 0           | 0            | 0           | 0.864728    | 84.7519<br>9 | 0.85608      | 3.06E-07     | 86.4731<br>3 | 0.87346<br>6 |
| C10              | kg/h<br>r | 0        | 0           | 0            | 0            | 0       | 0           | 0            | 0           | 0.092323    | 1.03200<br>1 | 101.1464     | 1.021681     | 103.292<br>9 | 1.04336<br>2 |
| C12              | kg/h<br>r | 0        | 0           | 0            | 0            | 0       | 0           | 0            | 0           | 0.009482    | 0            | 1.201073     | 118.9062     | 120.117<br>2 | 1.21330<br>6 |

**Supplementary Table 56.** Major mass balance data for the annual production of 3,000-ton C<sub>6</sub>H<sub>12</sub>O<sub>2</sub> from CO<sub>2</sub> (Case D1).

|                  | Unit  | FEED     | MEOH-1   | BIO      | MED      | MEOH     | AIR      | BIO      | BIOMASS  | C6-OUT   | LIPID    | SPENT    |
|------------------|-------|----------|----------|----------|----------|----------|----------|----------|----------|----------|----------|----------|
| O <sub>2</sub>   | kg/hr | 14028.67 | 14028.67 | 6317.898 | 0        | 14028.67 | 3294.64  | 6.317898 | 0        | 0        | 0        | 0        |
| CO <sub>2</sub>  | kg/hr | 13000    | 650      | 6257.888 | 0        | 650      | 0        | 6.257888 | 0        | 0        | 0        | 0        |
| N <sub>2</sub>   | kg/hr | 0        | 0        | 0        | 0        | 0        | 12394.12 | 0        | 0        | 0        | 0        | 0        |
| H <sub>2</sub> O | kg/hr | 23.842   | 5079.278 | 73019.69 | 60527.63 | 5079.278 | 0        | 73019.69 | 3650.985 | 5.94E-13 | 0.061069 | 0.000617 |
| Biomass          | kg/hr | 0        | 0        | 2907.899 | 0        | 0        | 0        | 2617.109 | 2355.398 | 0        | 0        | 0        |
| Chitosan         | kg/hr | 0        | 0        | 0        | 0        | 0        | 0        | 0        | 0.1305   | 0.129195 | 0.129195 | 0.001305 |
| NH <sub>3</sub>  | kg/hr | 0        | 0        | 5.016515 | 490      | 0        | 0        | 5.016515 | 0.250826 | 1.18E-24 | 2.91E-07 | 2.94E-09 |
| Spent            | kg/hr | 0        | 0        | 0        | 0        | 0        | 0        | 0        | 0        | 19.63179 | 19.63179 | 1943.547 |
| H <sub>2</sub>   | kg/hr | 1767.573 | 70.48872 | 70.48872 | 0        | 70.48872 | 0        | 0.070489 | 0        | 0        | 0        | 0        |
| MEOH             | kg/hr | 0        | 8991.649 | 1258.831 | 0        | 8991.649 | 0        | 1258.831 | 62.94154 | 1.90E-11 | 0.000163 | 1.65E-06 |
| 1-HEX            | kg/hr | 0        | 0        | 0        | 0        | 0        | 0        | 0        | 0        | 7.524    | 752.4    | 7.6      |
| C6               | kg/hr | 0        | 0        | 0        | 0        | 0        | 0        | 0        | 0        | 384.4139 | 388.2969 | 3.92219  |

**Supplementary Table 57.** Major mass balance data for the annual production of 3,000-ton C<sub>8</sub>H<sub>16</sub>O<sub>2</sub> from CO<sub>2</sub> (Case D2).

|                  | Unit  | FEED     | MEOH-1   | BIO      | MED      | MEOH     | AIR      | BIO      | BIOMASS  | C8-OUT   | LIPID    | SPENT    |
|------------------|-------|----------|----------|----------|----------|----------|----------|----------|----------|----------|----------|----------|
| O <sub>2</sub>   | kg/hr | 14028.67 | 14028.67 | 6317.898 | 0        | 14028.67 | 3294.64  | 6.317898 | 0        | 0        | 0        | 0        |
| CO <sub>2</sub>  | kg/hr | 13000    | 650      | 6257.888 | 0        | 650      | 0        | 6.257888 | 0        | 0        | 0        | 0        |
| N <sub>2</sub>   | kg/hr | 0        | 0        | 0        | 0        | 0        | 12394.12 | 0        | 0        | 0        | 0        | 0        |
| H <sub>2</sub> O | kg/hr | 23.842   | 5079.278 | 73019.69 | 60527.63 | 5079.278 | 0        | 73019.69 | 3650.985 | 7.06E-41 | 0.061069 | 0.000617 |
| Biomass          | kg/hr | 0        | 0        | 2907.899 | 0        | 0        | 0        | 2617.109 | 2355.398 | 0        | 0        | 0        |
| Chitosan         | kg/hr | 0        | 0        | 0        | 0        | 0        | 0        | 0        | 0.1305   | 0.129195 | 0.129195 | 0.001305 |
| NH <sub>3</sub>  | kg/hr | 0        | 0        | 5.016515 | 490      | 0        | 0        | 5.016515 | 0.250826 | 4.14E-45 | 2.91E-07 | 2.94E-09 |
| Spent            | kg/hr | 0        | 0        | 0        | 0        | 0        | 0        | 0        | 0        | 19.63179 | 19.63179 | 1943.547 |
| H <sub>2</sub>   | kg/hr | 1767.573 | 70.48872 | 70.48872 | 0        | 70.48872 | 0        | 0.070489 | 0        | 0        | 0        | 0        |
| MEOH             | kg/hr | 0        | 8991.649 | 1258.831 | 0        | 8991.649 | 0        | 1258.831 | 62.94154 | 9.06E-23 | 0.000163 | 1.65E-06 |
| 1-HEX            | kg/hr | 0        | 0        | 0        | 0        | 0        | 0        | 0        | 0        | 2.506029 | 752.4    | 7.6      |
| C8               | kg/hr | 0        | 0        | 0        | 0        | 0        | 0        | 0        | 0        | 388.2521 | 388.2969 | 3.92219  |

**Supplementary Table 58.** Major mass balance data for the annual production of 3,000-ton C<sub>10</sub>H<sub>20</sub>O<sub>2</sub> from CO<sub>2</sub> (Case D3).

|                  | Unit  | FEED     | MEOH-1   | BIO      | MED      | MEOH     | AIR      | BIO      | BIOMASS  | C10-OUT  | LIPID    | SPENT    |
|------------------|-------|----------|----------|----------|----------|----------|----------|----------|----------|----------|----------|----------|
| O <sub>2</sub>   | kg/hr | 14028.67 | 14028.67 | 6317.898 | 0        | 14028.67 | 3294.64  | 6.317898 | 0        | 0        | 0        | 0        |
| CO <sub>2</sub>  | kg/hr | 13000    | 650      | 6257.888 | 0        | 650      | 0        | 6.257888 | 0        | 0        | 0        | 0        |
| N <sub>2</sub>   | kg/hr | 0        | 0        | 0        | 0        | 0        | 12394.12 | 0        | 0        | 0        | 0        | 0        |
| H <sub>2</sub> O | kg/hr | 23.842   | 5079.278 | 73019.69 | 60527.63 | 5079.278 | 0        | 73019.69 | 3650.985 | 2.81E-42 | 0.061069 | 0.000617 |
| Biomass          | kg/hr | 0        | 0        | 2907.899 | 0        | 0        | 0        | 2617.109 | 2355.398 | 0        | 0        | 0        |
| Chitosan         | kg/hr | 0        | 0        | 0        | 0        | 0        | 0        | 0        | 0.1305   | 0.129195 | 0.129195 | 0.001305 |
| NH <sub>3</sub>  | kg/hr | 0        | 0        | 5.016515 | 490      | 0        | 0        | 5.016515 | 0.250826 | 3.69E-45 | 2.91E-07 | 2.94E-09 |
| Spent            | kg/hr | 0        | 0        | 0        | 0        | 0        | 0        | 0        | 0        | 19.63179 | 19.63179 | 1943.547 |
| H <sub>2</sub>   | kg/hr | 1767.573 | 70.48872 | 70.48872 | 0        | 70.48872 | 0        | 0.070489 | 0        | 0        | 0        | 0        |
| MEOH             | kg/hr | 0        | 8991.649 | 1258.831 | 0        | 8991.649 | 0        | 1258.831 | 62.94154 | 4.59E-23 | 0.000163 | 1.65E-06 |
| 1-HEX            | kg/hr | 0        | 0        | 0        | 0        | 0        | 0        | 0        | 0        | 2.468394 | 752.4    | 7.6      |
| C10              | kg/hr | 0        | 0        | 0        | 0        | 0        | 0        | 0        | 0        | 388.2897 | 388.2969 | 3.92219  |

**Supplementary Table 59.** Major mass balance data for the annual production of 3,000-ton C<sub>12</sub>H<sub>24</sub>O<sub>2</sub> from CO<sub>2</sub> (Case D4).

|                  | Unit  | FEED     | MEOH-1   | BIO      | MED      | MEOH     | AIR      | BIO      | BIOMASS  | C12-OUT  | LIPID    | SPENT    |
|------------------|-------|----------|----------|----------|----------|----------|----------|----------|----------|----------|----------|----------|
| O <sub>2</sub>   | kg/hr | 14028.67 | 14028.67 | 6317.898 | 0        | 14028.67 | 3294.64  | 6.317898 | 0        | 0        | 0        | 0        |
| CO <sub>2</sub>  | kg/hr | 13000    | 650      | 6257.888 | 0        | 650      | 0        | 6.257888 | 0        | 0        | 0        | 0        |
| N <sub>2</sub>   | kg/hr | 0        | 0        | 0        | 0        | 0        | 12394.12 | 0        | 0        | 0        | 0        | 0        |
| H <sub>2</sub> O | kg/hr | 23.842   | 5079.278 | 73019.69 | 60527.63 | 5079.278 | 0        | 73019.69 | 3650.985 | 1.90E-43 | 0.061069 | 0.000617 |
| Biomass          | kg/hr | 0        | 0        | 2907.899 | 0        | 0        | 0        | 2617.109 | 2355.398 | 0        | 0        | 0        |
| Chitosan         | kg/hr | 0        | 0        | 0        | 0        | 0        | 0        | 0        | 0.1305   | 0.129195 | 0.129195 | 0.001305 |
| NH <sub>3</sub>  | kg/hr | 0        | 0        | 5.016515 | 490      | 0        | 0        | 5.016515 | 0.250826 | 3.37E-45 | 2.91E-07 | 2.94E-09 |
| Spent            | kg/hr | 0        | 0        | 0        | 0        | 0        | 0        | 0        | 0        | 19.63179 | 19.63179 | 1943.547 |
| H <sub>2</sub>   | kg/hr | 1767.573 | 70.48872 | 70.48872 | 0        | 70.48872 | 0        | 0.070489 | 0        | 0        | 0        | 0        |
| MEOH             | kg/hr | 0        | 8991.649 | 1258.831 | 0        | 8991.649 | 0        | 1258.831 | 62.94154 | 2.55E-23 | 0.000163 | 1.65E-06 |
| 1-HEX            | kg/hr | 0        | 0        | 0        | 0        | 0        | 0        | 0        | 0        | 2.462521 | 752.4    | 7.6      |
| C12              | kg/hr | 0        | 0        | 0        | 0        | 0        | 0        | 0        | 0        | 388.2956 | 388.2969 | 3.92219  |

**Supplementary Table 60.** Major mass balance data for the annual production of 3,000-ton mixed MCFAs from CO<sub>2</sub> (Case D5).

|                  | Unit  | FEED     | MEOH-1   | BIO      | MED      | MEOH     | BIO      | BIOMASS  | C6H12O2  | C8H16O2  | C10H20O2 | C12H24O2 | LIPID    | SPENT    |
|------------------|-------|----------|----------|----------|----------|----------|----------|----------|----------|----------|----------|----------|----------|----------|
| O <sub>2</sub>   | kg/hr | 14028.67 | 14028.67 | 6317.898 | 0        | 14028.67 | 6.317898 | 0        | 0        | 0        | 0        | 0        | 0        | 0        |
| CO <sub>2</sub>  | kg/hr | 13000    | 650      | 6257.888 | 0        | 650      | 6.257888 | 0        | 0        | 0        | 0        | 0        | 0        | 0        |
| N <sub>2</sub>   | kg/hr | 0        | 0        | 0        | 0        | 0        | 0        | 0        | 0        | 0        | 0        | 0        | 0        | 0        |
| H <sub>2</sub> O | kg/hr | 23.842   | 5079.278 | 73019.69 | 60527.63 | 5079.278 | 73019.69 | 3650.985 | 0        | 0        | 0        | 0        | 0.061092 | 0.000617 |
| Biomass          | kg/hr | 0        | 0        | 2907.899 | 0        | 0        | 2907.899 | 2617.109 | 0        | 0        | 0        | 0        | 0        | 0        |
| Chitosan         | kg/hr | 0        | 0        | 0        | 0        | 0        | 0        | 0.1305   | 5.49E-07 | 0        | 0        | 0.129194 | 1.29E-01 | 0.001305 |
| NH <sub>3</sub>  | kg/hr | 0        | 0        | 5.016515 | 490      | 0        | 0.016515 | 0.000826 | 0.00E+00 | 0        | 0        | 0.00E+00 | 9.59E-10 | 9.69E-12 |
| Spent            | kg/hr | 0        | 0        | 0        | 0        | 0        | 0        | 0        | 0        | 0        | 0        | 22.11742 | 22.11742 | 2189.624 |
| H <sub>2</sub>   | kg/hr | 1767.573 | 70.48872 | 70.48872 | 0        | 70.48872 | 0.070489 | 0        | 0        | 0        | 0        | 0        | 0        | 0        |
| MEOH             | kg/hr | 0        | 8991.649 | 1258.831 | 0        | 8991.649 | 1258.831 | 62.94154 | 0        | 0        | 0        | 0        | 0        | 0        |
| 1-HEX            | kg/hr | 0        | 0        | 0        | 0        | 0        | 0        | 0        | 0.987625 | 0.002375 | 0        | 0        | 99       | 1        |
| C6               | kg/hr | 0        | 0        | 0        | 0        | 0        | 0        | 0        | 72.18349 | 0.729126 | 0        | 0        | 73.64911 | 0.74393  |
| C8               | kg/hr | 0        | 0        | 0        | 0        | 0        | 0        | 0        | 0.914349 | 89.61534 | 0.905205 | 3.23E-07 | 91.43504 | 0.923586 |
| C10              | kg/hr | 0        | 0        | 0        | 0        | 0        | 0        | 0        | 0.097498 | 1.091222 | 106.9507 | 1.08031  | 109.2199 | 1.103231 |
| C12              | kg/hr | 0        | 0        | 0        | 0        | 0        | 0        | 0        | 0.010012 | 0        | 1.269995 | 125.7295 | 127.0097 | 1.282926 |

**Supplementary Table 61.** Major mass balance data for the annual production of 3,000-ton C<sub>6</sub>H<sub>12</sub>O<sub>2</sub> from CH<sub>4</sub> (Case E1).

|                  | Unit  | AIR     | BIO      | MED     | METHANE | O2-IN    | AIR      | BIO      | BIOMASS  | C6H12O2  | LIPID    | SPENT    |
|------------------|-------|---------|----------|---------|---------|----------|----------|----------|----------|----------|----------|----------|
| O <sub>2</sub>   | kg/hr | 11501.7 | 28.64959 | 0       | 0       | 10926.62 | 3361.602 | 0.02865  | 0        | 0        | 0        | 0        |
| CO <sub>2</sub>  | kg/hr | 0       | 5102.503 | 0       | 0       | 0        | 0        | 5.102503 | 0        | 0        | 0        | 0        |
| CH <sub>4</sub>  | kg/hr | 0       | 2480     | 0       | 6200    | 0        | 0        | 2.48     | 0        | 0        | 0        | 0        |
| N <sub>2</sub>   | kg/hr | 43268.3 | 2163.415 | 0       | 0       | 2163.415 | 12646.03 | 2.163415 | 0        | 0        | 0        | 0        |
| H <sub>2</sub> O | kg/hr | 0       | 68626.04 | 61576.7 | 0       | 0        | 0        | 68626.04 | 3431.302 | 5.07E-32 | 0.065655 | 0.000663 |
| Biomass          | kg/hr | 0       | 2959.751 | 0       | 0       | 0        | 0        | 2959.751 | 2663.776 | 0        | 0        | 0        |
| Chitosan         | kg/hr | 0       | 0        | 0       | 0       | 0        | 0        | 0        | 0.1335   | 0.132165 | 0.132165 | 0.001335 |
| NH <sub>3</sub>  | kg/hr | 0       | 1.36858  | 495     | 0       | 0        | 0        | 1.36858  | 0.068429 | 3.06E-44 | 9.12E-08 | 9.22E-10 |
| Spent            | kg/hr | 0       | 0        | 0       | 0       | 0        | 0        | 0        | 0        | 22.83861 | 22.83861 | 2261.023 |
| 1-HEX            | kg/hr | 0       | 0        | 0       | 0       | 0        | 0        | 0        | 0        | 59.16223 | 752.4    | 7.6      |
| C6               | kg/hr | 0       | 0        | 0       | 0       | 0        | 0        | 0        | 0        | 319.4186 | 376.1152 | 3.799143 |

**Supplementary Table 62.** Major mass balance data for the annual production of 3,000-ton C<sub>8</sub>H<sub>16</sub>O<sub>2</sub> from CH<sub>4</sub> (Case E2).

|                  | Unit  | AIR     | BIO      | MED     | METHANE | O2-IN    | AIR      | BIO      | BIOMASS  | C8H16O2  | LIPID    | SPENT    |
|------------------|-------|---------|----------|---------|---------|----------|----------|----------|----------|----------|----------|----------|
| O <sub>2</sub>   | kg/hr | 11501.7 | 28.64959 | 0       | 0       | 10926.62 | 3361.602 | 0.02865  | 0        | 0        | 0        | 0        |
| CO <sub>2</sub>  | kg/hr | 0       | 5102.503 | 0       | 0       | 0        | 0        | 5.102503 | 0        | 0        | 0        | 0        |
| CH <sub>4</sub>  | kg/hr | 0       | 2480     | 0       | 6200    | 0        | 0        | 2.48     | 0        | 0        | 0        | 0        |
| N <sub>2</sub>   | kg/hr | 43268.3 | 2163.415 | 0       | 0       | 2163.415 | 12646.03 | 2.163415 | 0        | 0        | 0        | 0        |
| H <sub>2</sub> O | kg/hr | 0       | 68626.04 | 61576.7 | 0       | 0        | 0        | 68626.04 | 3431.302 | 4.58E-41 | 0.065655 | 0.000663 |
| Biomass          | kg/hr | 0       | 2959.751 | 0       | 0       | 0        | 0        | 2959.751 | 2663.776 | 0        | 0        | 0        |
| Chitosan         | kg/hr | 0       | 0        | 0       | 0       | 0        | 0        | 0        | 0.1335   | 0.132165 | 0.132165 | 0.001335 |
| NH <sub>3</sub>  | kg/hr | 0       | 1.36858  | 495     | 0       | 0        | 0        | 1.36858  | 0.068429 | 1.27E-45 | 9.12E-08 | 9.22E-10 |
| Spent            | kg/hr | 0       | 0        | 0       | 0       | 0        | 0        | 0        | 0        | 22.83861 | 22.83861 | 2261.023 |
| 1-HEX            | kg/hr | 0       | 0        | 0       | 0       | 0        | 0        | 0        | 0        | 2.508965 | 752.4    | 7.6      |
| C8               | kg/hr | 0       | 0        | 0       | 0       | 0        | 0        | 0        | 0        | 376.0718 | 376.1152 | 3.799143 |

**Supplementary Table 63.** Major mass balance data for the annual production of 3,000-ton C<sub>10</sub>H<sub>20</sub>O<sub>2</sub> from CH<sub>4</sub> (Case E3).

|                  | Unit  | AIR     | BIO      | MED     | METHANE | O2-IN    | AIR      | BIO      | BIOMASS  | C10H20O2 | LIPID    | SPENT    |
|------------------|-------|---------|----------|---------|---------|----------|----------|----------|----------|----------|----------|----------|
| O <sub>2</sub>   | kg/hr | 11501.7 | 28.64959 | 0       | 0       | 10926.62 | 3361.602 | 0.02865  | 0        | 0        | 0        | 0        |
| CO <sub>2</sub>  | kg/hr | 0       | 5102.503 | 0       | 0       | 0        | 0        | 5.102503 | 0        | 0        | 0        | 0        |
| CH <sub>4</sub>  | kg/hr | 0       | 2480     | 0       | 6200    | 0        | 0        | 2.48     | 0        | 0        | 0        | 0        |
| N <sub>2</sub>   | kg/hr | 43268.3 | 2163.415 | 0       | 0       | 2163.415 | 12646.03 | 2.163415 | 0        | 0        | 0        | 0        |
| H <sub>2</sub> O | kg/hr | 0       | 68626.04 | 61576.7 | 0       | 0        | 0        | 68626.04 | 3431.302 | 1.90E-42 | 0.065655 | 0.000663 |
| Biomass          | kg/hr | 0       | 2959.751 | 0       | 0       | 0        | 0        | 2959.751 | 2663.776 | 0        | 0        | 0        |
| Chitosan         | kg/hr | 0       | 0        | 0       | 0       | 0        | 0        | 0        | 0.1335   | 0.132165 | 0.132165 | 0.001335 |
| NH <sub>3</sub>  | kg/hr | 0       | 1.36858  | 495     | 0       | 0        | 0        | 1.36858  | 0.068429 | 1.13E-45 | 9.12E-08 | 9.22E-10 |
| Spent            | kg/hr | 0       | 0        | 0       | 0       | 0        | 0        | 0        | 0        | 22.83861 | 22.83861 | 2261.023 |
| 1-HEX            | kg/hr | 0       | 0        | 0       | 0       | 0        | 0        | 0        | 0        | 2.472575 | 752.4    | 7.6      |
| C10              | kg/hr | 0       | 0        | 0       | 0       | 0        | 0        | 0        | 0        | 376.1082 | 376.1152 | 3.799143 |

**Supplementary Table 64.** Major mass balance data for the annual production of 3,000-ton C<sub>12</sub>H<sub>24</sub>O<sub>2</sub> from CH<sub>4</sub> (Case E4).

|                  | Unit  | AIR     | BIO      | MED     | METHANE | O2-IN    | AIR      | BIO      | BIOMASS  | C12H24O2 | LIPID    | SPENT    |
|------------------|-------|---------|----------|---------|---------|----------|----------|----------|----------|----------|----------|----------|
| O <sub>2</sub>   | kg/hr | 11501.7 | 28.64959 | 0       | 0       | 10926.62 | 3361.602 | 0.02865  | 0        | 0        | 0        | 0        |
| CO <sub>2</sub>  | kg/hr | 0       | 5102.503 | 0       | 0       | 0        | 0        | 5.102503 | 0        | 0        | 0        | 0        |
| CH <sub>4</sub>  | kg/hr | 0       | 2480     | 0       | 6200    | 0        | 0        | 2.48     | 0        | 0        | 0        | 0        |
| N <sub>2</sub>   | kg/hr | 43268.3 | 2163.415 | 0       | 0       | 2163.415 | 12646.03 | 2.163415 | 0        | 0        | 0        | 0        |
| H <sub>2</sub> O | kg/hr | 0       | 68626.04 | 61576.7 | 0       | 0        | 0        | 68626.04 | 3431.302 | 1.26E-43 | 0.065655 | 0.000663 |
| Biomass          | kg/hr | 0       | 2959.751 | 0       | 0       | 0        | 0        | 2959.751 | 2663.776 | 0        | 0        | 0        |
| Chitosan         | kg/hr | 0       | 0        | 0       | 0       | 0        | 0        | 0        | 0.1335   | 0.132165 | 0.132165 | 0.001335 |
| NH <sub>3</sub>  | kg/hr | 0       | 1.36858  | 495     | 0       | 0        | 0        | 1.36858  | 0.068429 | 1.04E-45 | 9.12E-08 | 9.22E-10 |
| Spent            | kg/hr | 0       | 0        | 0       | 0       | 0        | 0        | 0        | 0        | 22.84809 | 22.84809 | 2261.961 |
| 1-HEX            | kg/hr | 0       | 0        | 0       | 0       | 0        | 0        | 0        | 0        | 2.466901 | 752.4    | 7.6      |
| C12              | kg/hr | 0       | 0        | 0       | 0       | 0        | 0        | 0        | 0        | 375.176  | 375.1772 | 3.789669 |

**Supplementary Table 65.** Major mass balance data for the annual production of 3,000-ton mixed MCFAs from CH<sub>4</sub> (Case E5).

|                  | Unit  | AIR     | BIO      | MED     | METHAN<br>E | O2-IN    | BIO      | BIOMAS<br>S | C6H12O<br>2 | C8H16O<br>2 | C10H20O<br>2 | C12H24O<br>2 | LIPID    | SPENT    |
|------------------|-------|---------|----------|---------|-------------|----------|----------|-------------|-------------|-------------|--------------|--------------|----------|----------|
| O <sub>2</sub>   | kg/hr | 11501.7 | 28.64959 | 0       | 0           | 10926.62 | 0.02865  | 0           | 0           | 0           | 0            | 0            | 0        | 0        |
| CO <sub>2</sub>  | kg/hr | 0       | 5102.503 | 0       | 0           | 0        | 5.102503 | 0           | 0           | 0           | 0            | 0            | 0        | 0        |
| CH <sub>4</sub>  | kg/hr | 0       | 2480     | 0       | 6200        | 0        | 2.48     | 0           | 0           | 0           | 0            | 0            | 0        | 0        |
| N <sub>2</sub>   | kg/hr | 43268.3 | 2163.415 | 0       | 0           | 2163.415 | 2.163415 | 0           | 0           | 0           | 0            | 0            | 0        | 0        |
| H <sub>2</sub> O | kg/hr | 0       | 68626.04 | 61576.7 | 0           | 0        | 68626.04 | 3431.302    | 0           | 0           | 0            | 0            | 0.065655 | 0.000663 |
| Biomass          | kg/hr | 0       | 2959.751 | 0       | 0           | 0        | 2959.751 | 2663.776    | 0           | 0           | 0            | 0            | 0        | 0        |
| Chitosan         | kg/hr | 0       | 0        | 0       | 0           | 0        | 0        | 0.1335      | 4.18E-07    | 0           | 0            | 0.132165     | 1.32E-01 | 0.001335 |
| NH <sub>3</sub>  | kg/hr | 0       | 1.36858  | 495     | 0           | 0        | 1.36858  | 0.068429    | 0.00E+00    | 0           | 0.00E+00     | 0.00E+00     | 9.12E-08 | 9.22E-10 |
| Spent            | kg/hr | 0       | 0        | 0       | 0           | 0        | 0        | 0           | 0           | 0           | 0            | 22.83861     | 22.83861 | 2261.023 |
| 1-HEX            | kg/hr | 0       | 0        | 0       | 0           | 0        | 0        | 0           | 7.50597     | 0.01803     | 0            | 0            | 752.4    | 7.6      |
| C6               | kg/hr | 0       | 0        | 0       | 0           | 0        | 0        | 0           | 67.65108    | 0.683344    | 0            | 0            | 69.02467 | 0.697219 |
| C8               | kg/hr | 0       | 0        | 0       | 0           | 0        | 0        | 0           | 0.856938    | 83.98851    | 0.848368     | 3.03E-07     | 85.69382 | 0.865594 |
| C10              | kg/hr | 0       | 0        | 0       | 0           | 0        | 0        | 0           | 0.091487    | 1.022705    | 100.2353     | 1.012478     | 102.3619 | 1.033959 |
| C12              | kg/hr | 0       | 0        | 0       | 0           | 0        | 0        | 0           | 0.009396    | 0           | 1.190253     | 117.8351     | 119.0347 | 1.202371 |

**Supplementary Table 66.** Energy balance data for the annual production of 3,000-ton mixed MCFAs from fossil-based methanol (Case A).

|         | W        | W200     | W300     | W500     | WORK     |
|---------|----------|----------|----------|----------|----------|
| Case A1 | -4445.51 | 1617.875 | 657.2177 | 3633.053 | 5908.146 |
| Case A2 | -4445.51 | 1617.875 | 657.2177 | 3633.053 | 5908.146 |
| Case A3 | -4445.51 | 1617.875 | 657.2177 | 3633.053 | 5908.146 |
| Case A4 | -4445.51 | 1617.875 | 657.2177 | 3633.053 | 5908.146 |
| Case A5 | -2435.98 | 1610.994 | 402.4784 | 2265.676 | 4279.149 |

**Supplementary Table 67.** Energy balance data for the annual production of 3,000-ton mixed MCFAs from glucose (Case B).

|         | W           | W200       | W300       | W500       | WORK       |
|---------|-------------|------------|------------|------------|------------|
| Case B1 | -2472.09158 | 245.925877 | 477.044823 | 2166.86326 | 2889.83396 |
| Case B2 | -2472.09158 | 245.925877 | 477.044823 | 2166.86326 | 2889.83396 |
| Case B3 | -2472.09158 | 245.925877 | 477.044823 | 2166.86326 | 2889.83396 |
| Case B4 | -2472.09158 | 245.925877 | 477.044823 | 2166.86326 | 2889.83396 |
| Case B5 | -2469.24464 | 245.925877 | 477.044823 | 2166.64278 | 2889.61348 |

**Supplementary Table 68.** Energy balance data for the annual production of 3,000-ton mixed MCFAs from corncob residues (Case C).

|         | W        | W200     | W300     | W500     | WORK     |
|---------|----------|----------|----------|----------|----------|
| Case C1 | -2697.27 | 293.0344 | 477.7151 | 2181.505 | 2952.254 |
| Case C2 | -2697.27 | 293.0344 | 477.7151 | 2181.505 | 2952.254 |
| Case C3 | -2697.27 | 293.0344 | 477.7151 | 2181.505 | 2952.254 |
| Case C4 | -2697.27 | 293.0344 | 477.7151 | 2181.505 | 2952.254 |
| Case C5 | -2697.27 | 293.0344 | 477.7151 | 2181.505 | 2952.254 |

**Supplementary Table 69.** Energy balance data for the annual production of 3,000-ton mixed MCFAs from CO<sub>2</sub> (Case D).

|         | W        | W200     | W300     | W500     | WORK     |
|---------|----------|----------|----------|----------|----------|
| Case D1 | -2306.34 | 10469.86 | 5.813586 | 679.5675 | 3193.48  |
| Case D2 | -2306.34 | 10469.86 | 5.813586 | 679.5675 | 3193.48  |
| Case D3 | -2306.34 | 10469.86 | 5.813586 | 679.5675 | 3193.48  |
| Case D4 | -2306.34 | 10469.86 | 5.813586 | 679.5675 | 3193.48  |
| Case B5 | -4541.41 | 10469.86 | 5.812778 | 679.567  | 3860.283 |

**Supplementary Table 70.** Energy balance data for the annual production of 3,000-ton mixed MCFAs from CH<sub>4</sub> (Case E).

|         | W        | W200     | W300     | W500    | WORK     |
|---------|----------|----------|----------|---------|----------|
| Case E1 | -15697.5 | 2814.643 | 692.8078 | 3112.66 | 6620.111 |
| Case E2 | -15697.5 | 2814.643 | 692.8078 | 3112.66 | 6620.111 |
| Case E3 | -15697.5 | 2814.643 | 692.8078 | 3112.66 | 6620.111 |
| Case E4 | -15697.5 | 2814.643 | 692.8078 | 3112.66 | 6620.111 |
| Case E5 | -15697.5 | 2814.643 | 692.8078 | 3112.66 | 6620.111 |

**Supplementary Table 71.** Assumptions on parameters for long-chain fatty acids (LCFAs) biosynthesis via glucose and methanol.

| Feedstock            | Glucose (LCFAs)                 | Methanol (LCFAs)       | Methanol / glucose (%) |
|----------------------|---------------------------------|------------------------|------------------------|
|                      | <i>Saccharomyces cerevisiae</i> | <i>Pichia pastoris</i> |                        |
| Titer (g/L)          | 33.4                            | 23.4                   | 70%                    |
| Productivity (g/L/h) | 0.14                            | 0.11                   | 79%                    |
| FFA content (%)      | ~15%                            | NA                     | ~15% <sup>4</sup>      |
| References           | 4                               | 5                      |                        |

**Supplementary Table 72.** Assumptions on parameters for long-chain fatty acids (LCFAs) biosynthesis via glucose and methane.

| Feedstock            | Glucose (LCFAs)                 | Methane (LCFAs)                    | Methane / glucose (%) |
|----------------------|---------------------------------|------------------------------------|-----------------------|
|                      | <i>Saccharomyces cerevisiae</i> | <i>Methylobacterium buryatense</i> |                       |
| Titer (g/L)          | 33.4                            | 2.18                               | 6.43%                 |
| Productivity (g/L/h) | 0.14                            | 0.045                              | 3.24%                 |
| FFA content (%)      | ~15%                            | 14.24%                             |                       |
| References           | 4                               | 14                                 |                       |

**Supplementary Table 73.** Reaction equations for the medium-chain fatty acids (MCFAs) production from fossil-based methanol.

| <b>Carbon sources</b> | <b>Biomass production</b>                                                                                                                                                             | <b>MCFAs composition</b>                                                    | <b>MCFAs production</b>                                                                                                                                                                                                                                               |
|-----------------------|---------------------------------------------------------------------------------------------------------------------------------------------------------------------------------------|-----------------------------------------------------------------------------|-----------------------------------------------------------------------------------------------------------------------------------------------------------------------------------------------------------------------------------------------------------------------|
| Case A:<br>Methanol   | $\text{CH}_3\text{OH} + 0.118 \text{ NH}_3 + 0.9985 \text{ O}_2 \rightarrow 0.118 \text{ Biomass (C}_4\text{H}_8\text{O}_2\text{N)} + 0.528 \text{ CO}_2 + 1.705 \text{ H}_2\text{O}$ | Case 1: 100% Caproic acid (C <sub>6</sub> H <sub>12</sub> O <sub>2</sub> )  | $2 \text{ C}_4\text{H}_8\text{O}_2\text{N} \rightarrow \text{C}_6\text{H}_{12}\text{O}_2 + \text{SPENT (C}_2\text{H}_4\text{O}_2\text{N}_2)$                                                                                                                          |
|                       |                                                                                                                                                                                       | Case 2: 100% Caprylic acid (C <sub>8</sub> H <sub>16</sub> O <sub>2</sub> ) | $3 \text{ C}_4\text{H}_8\text{O}_2\text{N} \rightarrow \text{C}_8\text{H}_{16}\text{O}_2 + \text{SPENT (C}_4\text{H}_8\text{O}_4\text{N}_3)$                                                                                                                          |
|                       |                                                                                                                                                                                       | Case 3: 100% Capric acid (C <sub>10</sub> H <sub>20</sub> O <sub>2</sub> )  | $3 \text{ C}_4\text{H}_8\text{O}_2\text{N} \rightarrow \text{C}_{10}\text{H}_{20}\text{O}_2 + \text{SPENT (C}_2\text{H}_4\text{O}_4\text{N}_3)$                                                                                                                       |
|                       |                                                                                                                                                                                       | Case 4: 100% Lauric acid (C <sub>12</sub> H <sub>24</sub> O <sub>2</sub> )  | $4 \text{ C}_4\text{H}_8\text{O}_2\text{N} \rightarrow \text{C}_{12}\text{H}_{24}\text{O}_2 + \text{SPENT (C}_4\text{H}_8\text{O}_6\text{N}_4)$                                                                                                                       |
|                       |                                                                                                                                                                                       | Case 5: equimolar mixture                                                   | $10 \text{ C}_4\text{H}_8\text{O}_2\text{N} \rightarrow \text{C}_6\text{H}_{12}\text{O}_2 + \text{C}_8\text{H}_{16}\text{O}_2 + \text{C}_{10}\text{H}_{20}\text{O}_2 + \text{C}_{12}\text{H}_{24}\text{O}_2 + \text{SPENT (C}_4\text{H}_8\text{O}_{12}\text{N}_{10})$ |

**Supplementary Table 74.** Reaction equations for the medium-chain fatty acids (MCFAs) production from glucose.

| <b>Carbon sources</b> | <b>Biomass production</b>                                                                         | <b>MCFAs composition</b>                       | <b>MCFAs production</b>                                                                                                       |
|-----------------------|---------------------------------------------------------------------------------------------------|------------------------------------------------|-------------------------------------------------------------------------------------------------------------------------------|
| Case B: Glucose       | $C_6H_{12}O_6 + NH_3 + 1.75O_2$<br>$\rightarrow$ Biomass ( $C_4H_8O_2N$ ) +<br>$2CO_2 + 3.5 H_2O$ | Case 1: 100% Caproic acid ( $C_6H_{12}O_2$ )   | $2 C_4H_8O_2N \rightarrow C_6H_{12}O_2 + SPENT (C_2H_4O_2N_2)$                                                                |
|                       |                                                                                                   | Case 2: 100% Caprylic acid ( $C_8H_{16}O_2$ )  | $3 C_4H_8O_2N \rightarrow C_8H_{16}O_2 + SPENT (C_4H_8O_4N_3)$                                                                |
|                       |                                                                                                   | Case 3: 100% Capric acid ( $C_{10}H_{20}O_2$ ) | $3 C_4H_8O_2N \rightarrow C_{10}H_{20}O_2 + SPENT (C_2H_4O_4N_3)$                                                             |
|                       |                                                                                                   | Case 4: 100% Lauric acid ( $C_{12}H_{24}O_2$ ) | $4 C_4H_8O_2N \rightarrow C_{12}H_{24}O_2 + SPENT (C_4H_8O_6N_4)$                                                             |
|                       |                                                                                                   | Case 5: equimolar mixture                      | $10 C_4H_8O_2N \rightarrow C_6H_{12}O_2 + C_8H_{16}O_2 + C_{10}H_{20}O_2$<br>$+ C_{12}H_{24}O_2 + SPENT (C_4H_8O_{12}N_{10})$ |

**Supplementary Table 75.** Reaction equations for the medium-chain fatty acids (MCFAs) production from corncob residues.

| <b>Carbon sources</b>                       | <b>Biomass production</b>                                                                                                                                                                       | <b>MCFAs composition</b>                                                    | <b>MCFAs production</b>                                                                                                                                                                                                                                                                                                         |
|---------------------------------------------|-------------------------------------------------------------------------------------------------------------------------------------------------------------------------------------------------|-----------------------------------------------------------------------------|---------------------------------------------------------------------------------------------------------------------------------------------------------------------------------------------------------------------------------------------------------------------------------------------------------------------------------|
|                                             |                                                                                                                                                                                                 | Case 1: 100% Caproic acid (C <sub>6</sub> H <sub>12</sub> O <sub>2</sub> )  | 2 C <sub>4</sub> H <sub>8</sub> O <sub>2</sub> N → C <sub>6</sub> H <sub>12</sub> O <sub>2</sub> + SPENT (C <sub>2</sub> H <sub>4</sub> O <sub>2</sub> N <sub>2</sub> )                                                                                                                                                         |
|                                             |                                                                                                                                                                                                 | Case 2: 100% Caprylic acid (C <sub>8</sub> H <sub>16</sub> O <sub>2</sub> ) | 3 C <sub>4</sub> H <sub>8</sub> O <sub>2</sub> N → C <sub>8</sub> H <sub>16</sub> O <sub>2</sub> + SPENT (C <sub>4</sub> H <sub>8</sub> O <sub>4</sub> N <sub>3</sub> )                                                                                                                                                         |
| Case C:<br>Lignocellulose-<br>based glucose | C <sub>6</sub> H <sub>12</sub> O <sub>6</sub> + NH <sub>3</sub> + 1.75O <sub>2</sub><br>→ Biomass (C <sub>4</sub> H <sub>8</sub> O <sub>2</sub> N) +<br>2CO <sub>2</sub> + 3.5 H <sub>2</sub> O | Case 3: 100% Capric acid (C <sub>10</sub> H <sub>20</sub> O <sub>2</sub> )  | 3 C <sub>4</sub> H <sub>8</sub> O <sub>2</sub> N → C <sub>10</sub> H <sub>20</sub> O <sub>2</sub> + SPENT (C <sub>2</sub> H <sub>4</sub> O <sub>4</sub> N <sub>3</sub> )                                                                                                                                                        |
|                                             |                                                                                                                                                                                                 | Case 4: 100% Lauric acid (C <sub>12</sub> H <sub>24</sub> O <sub>2</sub> )  | 4 C <sub>4</sub> H <sub>8</sub> O <sub>2</sub> N → C <sub>12</sub> H <sub>24</sub> O <sub>2</sub> + SPENT (C <sub>4</sub> H <sub>8</sub> O <sub>6</sub> N <sub>4</sub> )                                                                                                                                                        |
|                                             |                                                                                                                                                                                                 | Case 5: equimolar mixture                                                   | 10 C <sub>4</sub> H <sub>8</sub> O <sub>2</sub> N → C <sub>6</sub> H <sub>12</sub> O <sub>2</sub> + C <sub>8</sub> H <sub>16</sub> O <sub>2</sub> + C <sub>10</sub> H <sub>20</sub> O <sub>2</sub><br>+ C <sub>12</sub> H <sub>24</sub> O <sub>2</sub> + SPENT (C <sub>4</sub> H <sub>8</sub> O <sub>12</sub> N <sub>10</sub> ) |

**Supplementary Table 76.** Reaction equations for the medium-chain fatty acids (MCFAs) production from carbon dioxide.

| <b>Carbon sources</b>                   | <b>Biomass production</b>                                                                                                                                                            | <b>MCFAs composition</b>                                                    | <b>MCFAs production</b>                                                                                                                                                                                                                                                                                                      |
|-----------------------------------------|--------------------------------------------------------------------------------------------------------------------------------------------------------------------------------------|-----------------------------------------------------------------------------|------------------------------------------------------------------------------------------------------------------------------------------------------------------------------------------------------------------------------------------------------------------------------------------------------------------------------|
| Case D: CO <sub>2</sub> -based methanol | CH <sub>3</sub> OH + 0.118 NH <sub>3</sub> + 0.9985 O <sub>2</sub> → 0.118 Biomass (C <sub>4</sub> H <sub>8</sub> O <sub>2</sub> N) + 0.528 CO <sub>2</sub> + 1.705 H <sub>2</sub> O | Case 1: 100% Caproic acid (C <sub>6</sub> H <sub>12</sub> O <sub>2</sub> )  | 2 C <sub>4</sub> H <sub>8</sub> O <sub>2</sub> N → C <sub>6</sub> H <sub>12</sub> O <sub>2</sub> + SPENT (C <sub>2</sub> H <sub>4</sub> O <sub>2</sub> N <sub>2</sub> )                                                                                                                                                      |
|                                         |                                                                                                                                                                                      | Case 2: 100% Caprylic acid (C <sub>8</sub> H <sub>16</sub> O <sub>2</sub> ) | 3 C <sub>4</sub> H <sub>8</sub> O <sub>2</sub> N → C <sub>8</sub> H <sub>16</sub> O <sub>2</sub> + SPENT (C <sub>4</sub> H <sub>8</sub> O <sub>4</sub> N <sub>3</sub> )                                                                                                                                                      |
|                                         |                                                                                                                                                                                      | Case 3: 100% Capric acid (C <sub>10</sub> H <sub>20</sub> O <sub>2</sub> )  | 3 C <sub>4</sub> H <sub>8</sub> O <sub>2</sub> N → C <sub>10</sub> H <sub>20</sub> O <sub>2</sub> + SPENT (C <sub>2</sub> H <sub>4</sub> O <sub>4</sub> N <sub>3</sub> )                                                                                                                                                     |
|                                         |                                                                                                                                                                                      | Case 4: 100% Lauric acid (C <sub>12</sub> H <sub>24</sub> O <sub>2</sub> )  | 4 C <sub>4</sub> H <sub>8</sub> O <sub>2</sub> N → C <sub>12</sub> H <sub>24</sub> O <sub>2</sub> + SPENT (C <sub>4</sub> H <sub>8</sub> O <sub>6</sub> N <sub>4</sub> )                                                                                                                                                     |
|                                         |                                                                                                                                                                                      | Case 5: equimolar mixture                                                   | 10 C <sub>4</sub> H <sub>8</sub> O <sub>2</sub> N → C <sub>6</sub> H <sub>12</sub> O <sub>2</sub> + C <sub>8</sub> H <sub>16</sub> O <sub>2</sub> + C <sub>10</sub> H <sub>20</sub> O <sub>2</sub> + C <sub>12</sub> H <sub>24</sub> O <sub>2</sub> + SPENT (C <sub>4</sub> H <sub>8</sub> O <sub>12</sub> N <sub>10</sub> ) |

**Supplementary Table 77.** Reaction equations for the medium-chain fatty acids (MCFAs) production from methane.

| <b>Carbon sources</b>   | <b>Biomass production</b>                                                                                                                                               | <b>MCFAs composition</b>                                                    | <b>MCFAs production</b>                                                                                                                                                                                                                                                                                                         |
|-------------------------|-------------------------------------------------------------------------------------------------------------------------------------------------------------------------|-----------------------------------------------------------------------------|---------------------------------------------------------------------------------------------------------------------------------------------------------------------------------------------------------------------------------------------------------------------------------------------------------------------------------|
| Case E: CH <sub>4</sub> | 8 CH <sub>4</sub> + NH <sub>3</sub> + 11.75 O <sub>2</sub><br>→ Biomass (C <sub>4</sub> H <sub>8</sub> O <sub>2</sub> N) +<br>4 CO <sub>2</sub> + 13.5 H <sub>2</sub> O | Case 1: 100% Caproic acid (C <sub>6</sub> H <sub>12</sub> O <sub>2</sub> )  | 2 C <sub>4</sub> H <sub>8</sub> O <sub>2</sub> N → C <sub>6</sub> H <sub>12</sub> O <sub>2</sub> + SPENT (C <sub>2</sub> H <sub>4</sub> O <sub>2</sub> N <sub>2</sub> )                                                                                                                                                         |
|                         |                                                                                                                                                                         | Case 2: 100% Caprylic acid (C <sub>8</sub> H <sub>16</sub> O <sub>2</sub> ) | 3 C <sub>4</sub> H <sub>8</sub> O <sub>2</sub> N → C <sub>8</sub> H <sub>16</sub> O <sub>2</sub> + SPENT (C <sub>4</sub> H <sub>8</sub> O <sub>4</sub> N <sub>3</sub> )                                                                                                                                                         |
|                         |                                                                                                                                                                         | Case 3: 100% Capric acid (C <sub>10</sub> H <sub>20</sub> O <sub>2</sub> )  | 3 C <sub>4</sub> H <sub>8</sub> O <sub>2</sub> N → C <sub>10</sub> H <sub>20</sub> O <sub>2</sub> + SPENT (C <sub>2</sub> H <sub>4</sub> O <sub>4</sub> N <sub>3</sub> )                                                                                                                                                        |
|                         |                                                                                                                                                                         | Case 4: 100% Lauric acid (C <sub>12</sub> H <sub>24</sub> O <sub>2</sub> )  | 4 C <sub>4</sub> H <sub>8</sub> O <sub>2</sub> N → C <sub>12</sub> H <sub>24</sub> O <sub>2</sub> + SPENT (C <sub>4</sub> H <sub>8</sub> O <sub>6</sub> N <sub>4</sub> )                                                                                                                                                        |
|                         |                                                                                                                                                                         | Case 5: equimolar mixture                                                   | 10 C <sub>4</sub> H <sub>8</sub> O <sub>2</sub> N → C <sub>6</sub> H <sub>12</sub> O <sub>2</sub> + C <sub>8</sub> H <sub>16</sub> O <sub>2</sub> + C <sub>10</sub> H <sub>20</sub> O <sub>2</sub><br>+ C <sub>12</sub> H <sub>24</sub> O <sub>2</sub> + SPENT (C <sub>4</sub> H <sub>8</sub> O <sub>12</sub> N <sub>10</sub> ) |

**Supplementary Table 78.** Input and output items along with their corresponding entries from the Ecoinvent v3.6 database.

| <b>Items</b> | <b>Ecoinvent v3.6 database</b>                                                                             |
|--------------|------------------------------------------------------------------------------------------------------------|
| Methanol     | synthetic fuel production, from coal, high temperature Fisher-Tropsch operations   methanol   APOS, S   ZA |
| Glucose      | glucose production   glucose   APOS, S   RER                                                               |
| Methane      | natural gas venting from petroleum/natural gas production   natural gas, vented   APOS, S   GLO            |
| CTec3 enzyme | enzymes production   enzymes   APOS, S   RoW                                                               |
| Ammonium     | ammonium nitrate production   ammonium nitrate, as N   APOS, S   RER                                       |
| Flocculants  | carboxymethyl cellulose production, powder   carboxymethyl cellulose, powder   APOS, S   RER               |
| Water        | tap water production, conventional treatment   tap water   APOS, S   Europe without Switzerland            |
| Sludge       | drying, sewage sludge   raw sewage sludge   APOS, S   CH                                                   |
| Electricity  | electricity production, natural gas, 10MW   electricity, high voltage   APOS, S   RoW                      |

## Supplementary References

- 1 Shih, C. F., Zhang, T., Li, J. & Bai, C. Powering the Future with Liquid Sunshine. *Joule* **2**, 1925-1949, doi:10.1016/j.joule.2018.08.016 (2018).
- 2 Zhang, C. *et al.* An upcycling bioprocess for sustainable aviation fuel production from food waste-derived greenhouse gases: Life cycle assessment and techno-economic analysis. *Chemical Engineering Journal* **486**, 150242, doi:10.1016/j.cej.2024.150242 (2024).
- 3 Meng, J. *et al.* Economical production of *Pichia pastoris* single cell protein from methanol at industrial pilot scale. *Microbial Cell Factories* **22**, 198, doi:10.1186/s12934-023-02198-9 (2023).
- 4 Yu, T. *et al.* Reprogramming yeast metabolism from alcoholic fermentation to lipogenesis. *Cell* **174**, 1549-1558. e1514 (2018).
- 5 Cai, P. *et al.* Methanol biotransformation toward high-level production of fatty acid derivatives by engineering the industrial yeast *Pichia pastoris*. *Proceedings of the National Academy of Sciences* **119**, e2201711119 (2022).
- 6 Zhang, C. *et al.* Economic and sustainable revolution to facilitate one-carbon biomanufacturing. *Nature Communications* **16**, 1-10 (2025).
- 7 Shiloach, J. & Fass, R. Growing *E. coli* to high cell density—A historical perspective on method development. *Biotechnology Advances* **23**, 345-357, doi:<https://doi.org/10.1016/j.biotechadv.2005.04.004> (2005).
- 8 Wu, J., Zhang, X., Xia, X. & Dong, M. A systematic optimization of medium chain fatty acid biosynthesis via the reverse beta-oxidation cycle in *Escherichia coli*. *Metabolic engineering* **41**, 115-124 (2017).
- 9 Xu, P. *et al.* Modular optimization of multi-gene pathways for fatty acids production in *E. coli*. *Nature communications* **4**, 1409 (2013).
- 10 Mroziak, A., Łabużek, S. & Piotrowska-Seget, Z. Changes in fatty acid composition in *Pseudomonas putida* and *Pseudomonas stutzeri* during naphthalene degradation. *Microbiological Research* **160**, 149-157, doi:<https://doi.org/10.1016/j.micres.2004.11.001> (2005).
- 11 Wang, J. *et al.* A highly selective and stable ZnO-ZrO<sub>2</sub> solid solution catalyst for CO<sub>2</sub> hydrogenation to methanol. *Science advances* **3**, e1701290, doi:10.1126/sciadv.1701290 (2017).

- 12 Wang, J. *et al.* Liquid sunshine methanol. *Chemical Industry and Engineering Progress* **41**, 1309-1317, doi:10.16085/j.issn.1000-6613.2022-0244 (2022).
- 13 Henard, C. A. *et al.* Bioconversion of methane to lactate by an obligate methanotrophic bacterium. *Scientific Reports* **6**, 21585, doi:10.1038/srep21585 (2016).
- 14 Fei, Q., Puri, A. W., Smith, H., Dowe, N. & Pienkos, P. T. Enhanced biological fixation of methane for microbial lipid production by recombinant *Methylomicrobium buryatense*. *Biotechnology for Biofuels* **11**, 129, doi:10.1186/s13068-018-1128-6 (2018).
- 15 Yan, X. *et al.* Paradigm of engineering recalcitrant non-model microorganism with dominant metabolic pathway as a biorefinery chassis. *Nature Communications* **15**, 10441, doi:10.1038/s41467-024-54897-5 (2024).
- 16 Pollmann, K. *et al.* Bio-recycling of metals: Recycling of technical products using biological applications. *Biotechnology Advances* **36**, 1048-1062, doi:<https://doi.org/10.1016/j.biotechadv.2018.03.006> (2018).
- 17 Shen, L. *et al.* Isolation and purification of biosurfactant mannosylerythritol lipids from fermentation broth with methanol/water/n-hexane. *Separation and Purification Technology* **219**, 1-8 (2019).
- 18 Breyer, C., Fasihi, M., Bajamundi, C. & Creutzig, F. Direct air capture of CO<sub>2</sub>: a key technology for ambitious climate change mitigation. *Joule* **3**, 2053-2057 (2019).
- 19 Aui, A., Goldstein, H. M., Ellebracht, N. C., Li, W. & Pang, S. H. Comparative techno-economic analysis of synthetic renewable natural gas production via reactive CO<sub>2</sub> capture and conversion. *Cell Reports Sustainability* (2025).
- 20 Cameli, F. *et al.* Conceptual Process Design and Technoeconomic Analysis of an e-Methanol Plant with Direct Air-Captured CO<sub>2</sub> and Electrolytic H<sub>2</sub>. *Energy & Fuels* **38**, 3251-3261 (2024).
- 21 Valencia, L. E. *et al.* Engineering *Pseudomonas putida* KT2440 for chain length tailored free fatty acid and oleochemical production. *Communications Biology* **5**, 1363 (2022).
- 22 Fei, Q. *et al.* Biological valorization of natural gas for the production of lactic acid: techno-economic analysis and life cycle assessment. *Biochemical Engineering Journal* **158**, 107500, doi:10.1016/j.bej.2020.107500 (2020).

- 23 Li, Z. *et al.* Effects of controlled release urea combined with fulvic acid on wheat yield and soil physical and chemical properties. *Journal of Plant Nutrition and Fertilizers* **24**, 959-968, doi:10.11674/zwyf.17426 (2018).
- 24 Vasilakou, K., Nimmegeers, P., Billen, P. & Van Passel, S. Geospatial environmental techno-economic assessment of pretreatment technologies for bioethanol production. *Renewable and Sustainable Energy Reviews* **187**, 113743, doi:10.1016/j.rser.2023.113743 (2023).
- 25 Gomes, D. P. P. *et al.* Biological production of n-caproic acid by different anaerobic inocula: Chain elongation performance, kinetics, and changes in microbial community composition. *Biomass and Bioenergy* **200**, 108044, doi:<https://doi.org/10.1016/j.biombioe.2025.108044> (2025).
- 26 Mohd, N. K., Wen-Huei, L., Abu Hassan, N. A. s. & Shoot-Kian, Y. Potential application of palm oil products as electrical insulating medium in oil-immersed transformers. *Environmental Progress & Sustainable Energy* **40**, e13728, doi:<https://doi.org/10.1002/ep.13728> (2021).
- 27 Deutz, S. & Bardow, A. Life-cycle assessment of an industrial direct air capture process based on temperature–vacuum swing adsorption. *Nature Energy* **6**, 203-213, doi:10.1038/s41560-020-00771-9 (2021).
- 28 Ember. *Energy Institute - Statistical Review of World Energy (2025) – with major processing by Our World in Data. “Carbon intensity of electricity generation – Ember”* <<https://ourworldindata.org/grapher/carbon-intensity-electricity>> (2025).
- 29 Lilliestam, J., Eckardt, J. & Bersalli, G. Sequencing, spending, and symbolism: Low carbon taxes primarily serve purposes other than emissions reduction. *One Earth* **8**, 101390, doi:<https://doi.org/10.1016/j.oneear.2025.101390> (2025).
- 30 Hughes, S. *et al.* Cost of capturing CO<sub>2</sub> from industrial sources. (National Energy Technology Laboratory (NETL), Pittsburgh, PA, Morgantown, WV ..., 2023).
- 31 U.S. Energy Information Administration. *Henry Hub Natural Gas Spot Price*, <<https://www.eia.gov/dnav/ng/hist/rngwhhdm.htm>> (2025).
- 32 ICE. *Dutch TTF Natural Gas Futures*, <[ice.com/products/27996665/Dutch-TTF-Natural-Gas-Futures/data](https://ice.com/products/27996665/Dutch-TTF-Natural-Gas-Futures/data)> (2025).
- 33 EU Natural Gas. *Natural Gas EU*, <<https://tradingeconomics.com/commodity/eu-natural-gas>> (2025).

- 34 Japan Organization for Metals and Energy Security. *Trend of Natural Gas and LNG Prices*, <[https://oilgas-info.jogmec.go.jp/nglng\\_en/1007907/1010532.html](https://oilgas-info.jogmec.go.jp/nglng_en/1007907/1010532.html)> (2025).
- 35 National Bureau of Statistics of China. *National Economy was Generally Stable with Sustained Momentum of Steady Progress in October*, <<https://www.stats.gov.cn/english/>> (2025).
- 36 ETEnergyWorld. *Govt fixes domestic natural gas price at \$6.89 per mmBtu for July*, <<https://energy.economictimes.indiatimes.com/news/oil-and-gas/govt-fixes-domestic-natural-gas-price-at-6-89-per-mmbtu-for-july/122171298>> (2025).
- 37 AEMO. *GSH data dashboard*, <<https://www.aemo.com.au/energy-systems/gas/gas-supply-hub-gsh/data-gsh/data-dashboard>> (2025).
- 38 Wei, D. *et al.* Where will China's shale gas industry go? A scenario analysis of socio-technical transition. *Energy Strategy Reviews* **44**, 100990, doi:<https://doi.org/10.1016/j.esr.2022.100990> (2022).
- 39 Luo, D. K., Dai, Y. J. & Xia, L. Y. Economic evaluation based policy analysis for coalbed methane industry in China. *Energy* **36**, 360-368, doi:<https://doi.org/10.1016/j.energy.2010.10.031> (2011).
- 40 IEA. *Sustainable supply potential and costs*, <<https://www.iea.org/reports/outlook-for-biogas-and-biomethane-prospects-for-organic-growth/sustainable-supply-potential-and-costs>> (2025).
- 41 Alvarez, N. *Conversion of CO<sub>2</sub> to methanol*, (2023).
- 42 Sollai, S., Porcu, A., Tola, V., Ferrara, F. & Pettinau, A. Renewable methanol production from green hydrogen and captured CO<sub>2</sub>: A techno-economic assessment. *Journal of CO<sub>2</sub> Utilization* **68**, 102345, doi:<https://doi.org/10.1016/j.jcou.2022.102345> (2023).
- 43 Gu, Y., Wang, D., Chen, Q. & Tang, Z. Techno-economic analysis of green methanol plant with optimal design of renewable hydrogen production: A case study in China. *International Journal of Hydrogen Energy* **47**, 5085-5100, doi:<https://doi.org/10.1016/j.ijhydene.2021.11.148> (2022).
- 44 Cordero-Lanzac, T. *et al.* A techno-economic and life cycle assessment for the production of green methanol from CO<sub>2</sub>: catalyst and process bottlenecks. *Journal of Energy Chemistry* **68**, 255-266, doi:<https://doi.org/10.1016/j.jechem.2021.09.045> (2022).
